# Supplementary material for: Rapid and selective synthesis of spiropyrazolines and pyrazolylphthalides employing Seyferth–Gilbert reagent
Source: Royal Society of Chemistry journal article supplement (doi:10.1039/c7ob01417a), 2017-01-01

# Rapid and Selective Synthesis of Spiropyrazolines and Pyrazolyphthalides Employing Seyferth-Gilbert Reagent

Ashis Kumar Gupta, Narendra Kumar Vaishanv, Ruchir Kant and Kishor Mohanan\*

Medicinal and Process Chemistry Division  
CSIR-Central Drug Research Institute, Jankipuram Extension, Sitapur road,  
Lucknow, India-226031  
kishor.mohanan@cdri.res.in

## SUPPORTING INFORMATION

Content:

1. General experimental information (p. S2)
2. Procedure for preparation of the reaction substrates (2-arylidineindane-1,3-dione and Seyferth-Gilbert reagent) (p. S2)
3. Optimization studies (p. S4)
4. General Procedure for the synthesis of spiropyrazolines and pyrazolyphthalides **3a-3q** and **4a-4w** (p. S5)
5. Characterization data for compounds **3a-3q** and **4a-4w** (p. S7)
6. Copies of  $^1\text{H}$ ,  $^{13}\text{C}$  and  $^{31}\text{P}$  NMR spectra for all compounds (p. S30)

## **General experimental information:**

Unless otherwise specified, all reactions were carried out under air atmosphere in oven dried round-bottom flasks. Dimethyl 2-oxopropylphosphonate and 1,3-Indanedione were purchased from commercial sources and were used without further purification. The reactions were monitored by TLC visualized by UV (254 nm) and/or with iodine. Flash chromatography was performed on 100-200 mesh silica gel using the gradient system ethyl acetate-hexane (0-50%)/Acetone-Dichloromethane (0-30%). NMR data were recorded at Bruker AV 400 MHz in DMSO-d<sub>6</sub>/CDCl<sub>3</sub> using as internal standards the residual DMSO signal for <sup>1</sup>H NMR (δ = 2.50 ppm), CHCl<sub>3</sub> (δ = 7.26 ppm) respectively. The corresponding deuterated solvent signal for <sup>13</sup>C NMR were assigned as DMSO (δ = 39.51 ppm), CDCl<sub>3</sub> (77.16). Coupling constants are given in Hertz (Hz) and the classical abbreviations are used to describe the signal multiplicities. Melting points were measured with a Büchi B-540 apparatus and are uncorrected. High resolution mass spectra were obtained using Q-TOF mass spectrometer. All commercially available reagents were used as received.

## **General procedure for the synthesis of arylidene indanedione**

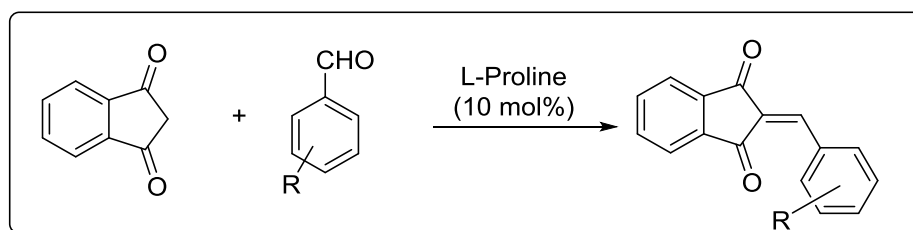

1,3-Indanedione (1.1 mmol), aldehydes (1 mmol), and L-proline (10 mol%) were mixed in a mortar under solvent-free conditions. The completion of the reaction was monitored by Thin Layer Chromatography (TLC), ethyl acetate was added to the crude reaction mixture. The reaction mixture in ethyl acetate was washed with brine and organic layers were separated and dried over anhydrous Na<sub>2</sub>SO<sub>4</sub> and evaporated under vacuum. The crude residues were purified by column chromatography (ethyl acetate/hexane: 1/9). Purified compounds were characterised by comparing with literature data.<sup>1</sup>

## Procedure for the preparation of Seyferth-Gilbert reagent (SGR)

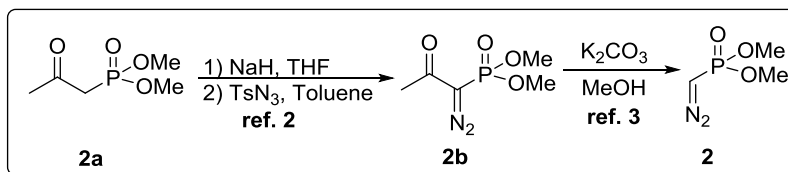

Dimethyl diazomethylphosphonate **2** was prepared by modifying the literature report.<sup>2,3</sup> To a stirred suspension of NaH (576 mg, 24.0 mmol) in dry THF (30 mL) at 0 °C, added a solution of 2-oxopropyl phosphonate **2a** (2.0 g, 12.0 mmol) in dry THF (10 mL) dropwise. The reaction mixture was stirred at 0 °C for 30 minutes and then solution of TsN<sub>3</sub> in toluene was added dropwise, the reaction mixture was further stirred at 25 °C for 3 h. After the completion of reaction, as indicated by TLC, the precipitate was filtered off. Solvent was removed on rotary evaporator and the residue was purified by column chromatography on silica gel (Acetone/Dichloromethane = 1/9). Compound **2b** was obtained as yellow liquid (1.96 g, 83% yield).

A solution of **2b** (1.92 g, 10 mmol) in 10 mL of MeOH was stirred with potassium carbonate (276 mg, 2 mmol) at room temperature for 15 min (monitored by TLC analysis). The precipitate was filtered off. Solvent was removed on rotary evaporator and the residue was purified by column chromatography on silica gel (Acetone/Dichloromethane = 1/9). Compound **2** was obtained as yellow liquid (1.3 g, 87 % yield).

### References

1. P. Goswami and B. Das, *Tetrahedron Lett.*, 2009, **50**, 897.
2. P. Callant, L. Dhaenens and M. Vandewalle, *Synth. Commun.*, 1984, **14**, 155.
3. S. Ohira, *Synth. Commun.*, 1989, **19**, 561.

## Optimization studies by varying base, solvent and stoichiometry: Synthesis of spiropyrazolines

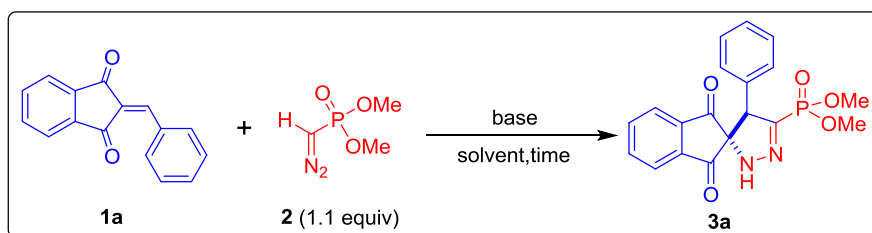

| S.No | Solvent                                          | Base              | Equiv | Yield |
|------|--------------------------------------------------|-------------------|-------|-------|
| 1    | Et <sub>2</sub> O                                | NaOH              | 2.0   | <5%   |
| 2    | CH <sub>3</sub> CN                               | <i>t</i> -BuOK    | 2.0   | <5%   |
| 3    | CH <sub>3</sub> CN                               | NaOEt             | 2.0   | <5%   |
| 4    | CH <sub>3</sub> CN                               | Et <sub>3</sub> N | 2.0   | 82%   |
| 5    | CH <sub>3</sub> CN                               | DBU               | 2.0   | 75%   |
| 6    | CH <sub>3</sub> CN                               | CsF               | 0.1   | 72%   |
| 7    | CH <sub>2</sub> Cl <sub>2</sub>                  | CsF               | 0.1   | 75%   |
| 8    | THF                                              | CsF               | 0.1   | 81%   |
| 9    | CH <sub>3</sub> COCH <sub>3</sub>                | CsF               | 0.1   | 87%   |
| 10   | Toluene                                          | CsF               | 0.1   | 56%   |
| 11   | CH <sub>3</sub> COOC <sub>2</sub> H <sub>5</sub> | CsF               | 0.1   | 79%   |
| 12   | Et <sub>2</sub> O                                | CsF               | 0.1   | 21%   |

## Optimization studies by varying base and stoichiometry of SGR: Synthesis of pyrazolylphthalides

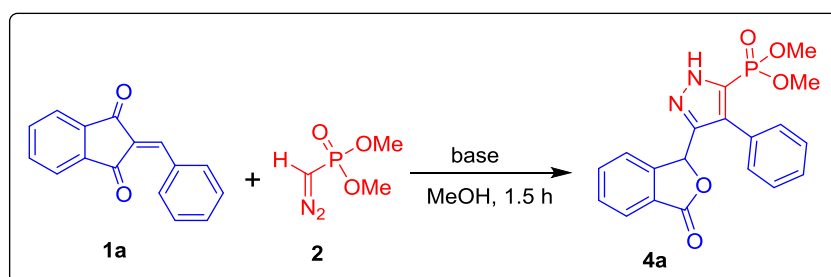

| S.No | Base                            | SGR (equiv) | Yield |
|------|---------------------------------|-------------|-------|
| 1    | NaOMe                           | 1.1         | 75%   |
| 2    | <i>t</i> -BuOK                  | 1.1         | 70%   |
| 3    | K <sub>2</sub> CO <sub>3</sub>  | 1.1         | 72%   |
| 4    | KOH                             | 1.1         | 77%   |
| 5    | NaOH                            | 1.1         | 79%   |
| 6    | DBU                             | 1.1         | 75%   |
| 7    | Na <sub>2</sub> CO <sub>3</sub> | 1.1         | 32%   |
| 8    | Et <sub>3</sub> N               | 1.1         | <5%   |
| 9    | NaOH                            | 1.5         | 86%   |

## Procedures

### Synthesis of spiropyrazolines 3a-3q

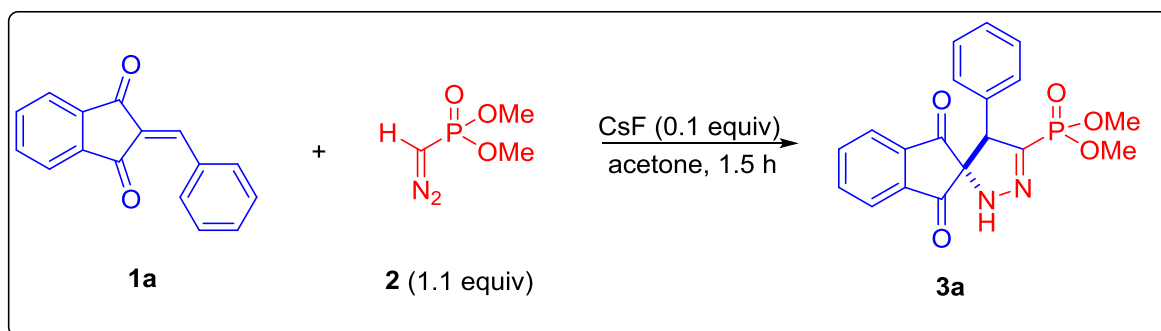

#### General procedure for the synthesis of spiropyrazolines 3a-3q

To an oven-dried round bottom flask was added 2-(benzylidene)-1H-indene-1,3(2H)-dione **1a** (50 mg, 0.21 mmol) and dissolved in 3 mL of acetone. Subsequently, a solution of Seyferth Gilbert reagent (33 mg, 0.24 mmol) in 2 mL of acetone was added to the reaction mixture and kept stirring. After addition of cesium fluoride (3.0 mg, 0.021 mmol), the reaction mixture was stirred at 25 °C for 1.5 h. After the completion of reaction, as indicated by TLC, solvent was evaporated off and extracted using ethyl acetate. The organic layer was dried over Na<sub>2</sub>SO<sub>4</sub> and evaporated under reduced pressure. The residue was purified using column chromatography (100-200 mesh silica gel) using acetone/dichloromethane as the eluent to afford the corresponding spiropyrazoline **3a** as a white solid (70 mg) in 87% yield.

## Synthesis of pyrazolylphthalides of 4a – 4w

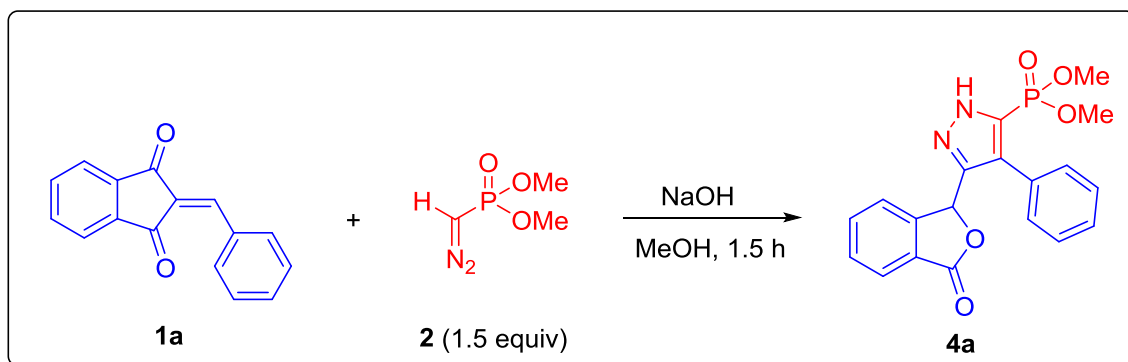

### **General procedure for the synthesis of pyrazolylphthalides 4a-4w**

To an oven-dried round bottom flask was added 2-(benzylidene)-1H-indene-1,3(2H)-dione **1a** (50 mg, 0.21 mmol) and dissolved in 3 mL of MeOH. Subsequently, Seyferth Gilbert reagent (48 mg, 0.33 mmol) in 2 mL of MeOH was added to the reaction mixture and kept stirring. After addition of Sodium hydroxide (21.0 mg, 0.53 mmol), the reaction mixture was stirred at 25 °C for 1.5 h. After the completion of reaction, as indicated by TLC, solvent was evaporated off and extracted using ethyl acetate. The organic layer was dried over  $\text{Na}_2\text{SO}_4$  and evaporated under reduced pressure. The residue was purified using column chromatography (100-200 mesh silica gel) using acetone/dichloromethane as the eluent to afford pyrazolylphthalides **4a** as a white solid (69 mg) in 86 % yield.

**Dimethyl (1,3-dioxo-4'-phenyl-1,2',3,4'-tetrahydrospiro[indene-2,3'-pyrazol]-5'-yl)phosphonate (3a)**

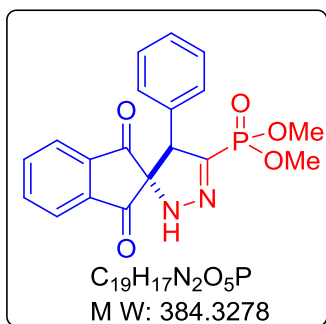

Following the general procedure, treatment of 2-(benzylidene)-1H-indene-1,3(2H)-dione (50 mg, 0.21 mmol) with SGR (36 mg, 0.24 mmol) in the presence of CsF (3.0 mg, 0.021 mmol) in acetone (3 mL) at 25 °C for 1.5 h followed by column chromatography afforded the product **3a** as a yellow solid (70 mg, 87%).  $R_f$  (Acetone/Dichloromethane: 1/9) = 0.29. **Mp** 178-180 °C.  $^{13}C$  NMR (100 MHz, ppm/ $CDCl_3$ ): 197.1 (C), 195.4 (C), 142.6 (d,  $J_{C-P}$  = 227.0 Hz, C), 141.6 (C), 140.1 (C), 136.6 (CH), 136.4 (CH), 131.8 (C), 129.5 (CH), 129.5 (CH), 128.7 (CH), 128.5 (CH), 128.5 (CH), 124.1 (CH), 123.5 (CH), 79.1 (d,  $J_{C-P}$  = 23.8 Hz, C), 65.3 (d,  $J_{C-P}$  = 23.8 Hz, CH), 53.6 (d,  $J_{C-P}$  = 5.5 Hz,  $CH_3$ ), 53.4 (d,  $J_{C-P}$  = 5.9 Hz,  $CH_3$ ).  $^1H$  NMR (400 MHz, ppm/ $CDCl_3$ ): 7.98 (d,  $J$  = 7.6 Hz, 1H), 7.82 (t,  $J$  = 7.6 Hz, 1H), 7.73 (t,  $J$  = 7.4 Hz, 1H), 7.54 (d,  $J$  = 7.6 Hz, 1H), 7.16-7.15 (m, 3H), 6.93-6.91 (m, 3H), 4.72 (s, 1H), 3.62 (d,  $J$  = 11.6 Hz, 3H), 3.58 (d,  $J$  = 11.2 Hz, 3H).  $^{31}P$  NMR (161.9 MHz,  $CDCl_3$ ): 8.95. **HRMS** for  $C_{19}H_{18}N_2O_5P^+$ : calcd.  $[M+H]^+$ : 385.0948, found: 385.0949.

**Dimethyl (4'-(4-methoxyphenyl)-1,3-dioxo-1,2',3,4'-tetrahydrospiro[indene-2,3'-pyrazol]-5'-yl)phosphonate (3b)**

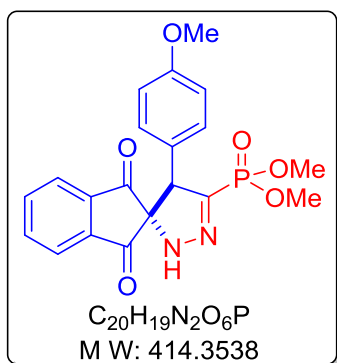

Following the general procedure, treatment of 2-(4-methoxybenzylidene)-1H-indene-1,3(2H)-dione (50 mg, 0.19 mmol) with SGR (32 mg, 0.21 mmol) in the presence of CsF (3.0 mg, 0.019 mmol) in acetone (3 mL) at 25 °C for 1.5 h followed by column chromatography afforded the product **3b** as a yellow solid (59 mg, 75%).  $R_f$  (Acetone/Dichloromethane: 1/9) = 0.31. **Mp** 160-162 °C.  $^{13}C$  NMR (100 MHz, ppm/ $CDCl_3$ ): 197.2 (C), 195.5 (C), 159.6 (C), 142.4 (d,  $J_{C-P}$  = 182.0 Hz, C), 141.5 (C), 140.1 (C), 136.5 (CH), 136.2 (CH), 130.7 (CH), 130.7 (CH), 123.9 (C), 123.7 (CH), 123.4 (CH), 113.8 (CH), 113.8 (CH), 79.0 (d,  $J_{C-P}$  = 3.6 Hz, C), 64.6 (d,  $J_{C-P}$  = 19.1 Hz, CH), 55.1 ( $CH_3$ ), 53.4 (d,  $J_{C-P}$  = 4.5 Hz,  $CH_3$ ), 53.3 (d,  $J_{C-P}$  = 4.9 Hz,  $CH_3$ ).  $^1H$  NMR (400 MHz, ppm/ $CDCl_3$ ): 7.96 (d,  $J$  = 7.6 Hz, 1H), 7.81 (t,  $J$  = 7.4 Hz, 1H), 7.73 (t,  $J$  = 7.4 Hz, 1H), 7.56 (d,  $J$  = 7.6 Hz, 1H), 6.92 (s, 1H), 6.83 (d,  $J$  = 8.4 Hz, 2H), 6.66 (d,  $J$  = 8.4 Hz,

2H), 4.68 (s, 1H), 3.69 (s, 3H), 3.60 (d,  $J = 11.2$  Hz, 3H), 3.58 (d,  $J = 11.6$  Hz, 3H).  $^{31}\text{P}$  NMR (161.9 MHz,  $\text{CDCl}_3$ ): 9.14. HRMS for  $\text{C}_{20}\text{H}_{20}\text{N}_2\text{O}_6\text{P}^+$ : calcd.  $[\text{M}+\text{H}]^+$ : 415.1053, found: 415.1053.

**Dimethyl (4'-(4-isopropylphenyl)-1,3-dioxo-1,2',3,4'-tetrahydrospiro[indene-2,3'-pyrazol]-5'-yl)phosphonate (3c)**

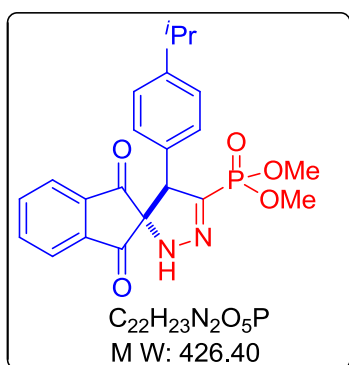

Following the general procedure, treatment of 2-(4-isopropylbenzylidene)-1H-indene-1,3(2H)-dione (50 mg, 0.18 mmol) with SGR (30 mg, 0.20 mmol) in the presence of CsF (3.0 mg, 0.018 mmol) in acetone (3 mL) at 25 °C for 1.5 h followed by column chromatography afforded the product **3c** as a yellow solid (71 mg, 92%).  $R_f$  (Acetone/Dichloromethane: 1/9) = 0.53. **Mp** 178-180 °C.  $^{13}\text{C}$  NMR (100 MHz, ppm/ $\text{CDCl}_3$ ): 197.1 (C), 195.6 (C), 149.4 (C), 143.1 (d,  $J_{\text{C-P}} = 226.7$  Hz, C), 141.6 (C), 140.3 (C), 136.5 (CH), 136.2 (CH), 129.5 (CH), 129.5 (CH), 129.0 (C), 126.6 (CH), 126.6 (CH), 124.0 (CH), 123.5 (CH), 79.6 (d,  $J_{\text{C-P}} = 4.1$  Hz, C), 65.4 (d,  $J_{\text{C-P}} = 24.0$  Hz, CH), 53.6 (d,  $J_{\text{C-P}} = 5.6$  Hz,  $\text{CH}_3$ ), 53.4 (d,  $J_{\text{C-P}} = 5.8$  Hz,  $\text{CH}_3$ ), 33.8 (CH), 23.9 ( $\text{CH}_3$ ), 23.8 ( $\text{CH}_3$ ).  $^1\text{H}$  NMR (400 MHz, ppm/ $\text{CDCl}_3$ ): 8.03 (d,  $J = 7.6$  Hz, 1H), 7.86 (t,  $J = 7.4$  Hz, 1H), 7.76 (t,  $J = 7.4$  Hz, 1H), 7.58 (d,  $J = 7.6$  Hz, 1H), 7.02 (d,  $J = 6.8$  Hz, 2H), 6.87 (d,  $J = 6.4$  Hz, 2H), 6.76-6.71 (m, 1H), 4.78 (s, 1H), 3.69 (d,  $J = 11.2$  Hz, 3H), 3.64 (d,  $J = 13.6$  Hz, 3H) 2.84-2.77 (m, 1H), 1.16 (d,  $J = 6.8$  Hz, 6H).  $^{31}\text{P}$  NMR (161.9 MHz,  $\text{CDCl}_3$ ): 9.00. HRMS for  $\text{C}_{22}\text{H}_{24}\text{N}_2\text{O}_5\text{P}^+$ : calcd.  $[\text{M}+\text{H}]^+$ : 427.1417, found: 427.1414.

**Dimethyl (4'-(4-ethylphenyl)-1,3-dioxo-1,2',3,4'-tetrahydrospiro[indene-2,3'-pyrazol]-5'-yl)phosphonate (3d)**

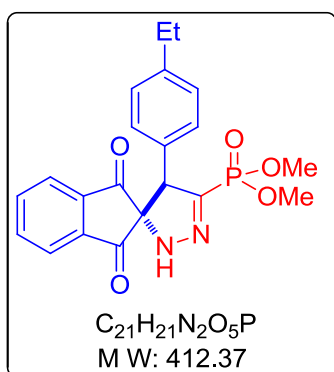

Following the general procedure, treatment of 2-(4-ethylbenzylidene)-1H-indene-1,3(2H)-dione (50 mg, 0.19 mmol) with SGR (32 mg, 0.21 mmol) in the presence of CsF (3.0 mg, 0.019 mmol) in acetone (3 mL) at 25 °C for 1.5 h followed by column chromatography afforded the product **3d** as a yellow solid (69 mg, 88%).  $R_f$  (Acetone/Dichloromethane: 1/9) = 0.58. **Mp** 170-172 °C.  $^{13}\text{C}$  NMR (100 MHz, ppm/ $\text{CDCl}_3$ ): 197.1 (C), 195.5 (C), 144.8 (C), 143.0 (d,  $J_{\text{C-P}} = 226.7$  Hz, C), 141.6 (C), 140.2 (C), 136.5 (CH), 136.3 (CH),



129.5 (CH), 129.5 (CH), 128.9 (C), 128.0 (CH), 128.0 (CH), 124.0 (CH), 123.5 (CH), 79.3 (d,  $J_{C-P}$  = 4.3 Hz, C), 65.2 (d,  $J_{C-P}$  = 23.9 Hz, CH), 53.6 (d,  $J_{C-P}$  = 5.4 Hz, CH<sub>3</sub>), 53.3 (d,  $J_{C-P}$  = 5.8 Hz, CH<sub>3</sub>), 28.5 (CH<sub>2</sub>), 15.3 (CH<sub>3</sub>). **<sup>1</sup>H NMR** (400 MHz, ppm/CDCl<sub>3</sub>): 7.99-7.96 (m, 1H), 7.84-7.79 (m, 1H), 7.73-7.72 (m, 1H), 7.56-7.53 (m, 1H), 6.97 (d,  $J$  = 4.8 Hz, 2H), 6.84-6.81 (m, 3H), 4.71 (s, 1H), 3.65-3.57 (m, 6H), 2.53-2.50 (m, 2H), 1.13-1.09 (m, 3H). **<sup>31</sup>P NMR** (161.9 MHz, CDCl<sub>3</sub>): 8.98. **HRMS** for C<sub>21</sub>H<sub>22</sub>N<sub>2</sub>O<sub>5</sub>P<sup>+</sup>: calcd. [M+H]<sup>+</sup>: 413.1261, found: 413.1251.

**Dimethyl (1,3-dioxo-4'-(*p*-tolyl)-1,2',3,4'-tetrahydrospiro[indene-2,3'-pyrazol]-5'-yl)phosphonate (3e)**

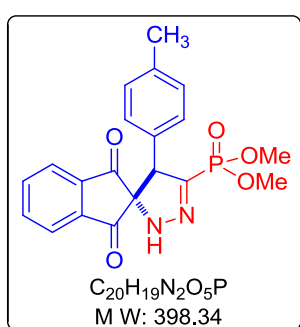

Following the general procedure, treatment of 2-(4-methylbenzylidene)-1H-indene-1,3(2H)-dione (50 mg, 0.20 mmol) with SGR (33 mg, 0.22 mmol) in the presence of CsF (3.0 mg, 0.02 mmol) in acetone (3 mL) at 25 °C for 1.5 h followed by column chromatography afforded the product **3e** as a yellow solid (70 mg, 88%). **R<sub>f</sub>** (Acetone/Dichloromethane: 1/9) = 0.41. **Mp** 192-194 °C.

**<sup>13</sup>C NMR** (100 MHz, ppm/ DMSO-*d*<sub>6</sub>): 197.4 (C), 195.0 (C), 141.1 (C), 139.6 (C), 139.0 (d,  $J_{C-P}$  = 182.0 Hz, C), 137.1 (C), 136.8 (CH), 136.6 (CH), 129.8 (C), 129.0 (CH), 129.0 (CH), 128.6 (CH), 128.6 (CH), 123.8 (CH), 122.8 (CH), 77.5 (d,  $J_{C-P}$  = 3.5 Hz, C), 62.2 (d,  $J_{C-P}$  = 19 Hz, CH), 52.8 (d,  $J_{C-P}$  = 4.8 Hz, CH<sub>3</sub>), 52.8 (d,  $J_{C-P}$  = 4.8 Hz, CH<sub>3</sub>), 20.7 (CH<sub>3</sub>). **<sup>1</sup>H NMR** (400 MHz, ppm/DMSO-*d*<sub>6</sub>): 8.59 (s, 1H), 8.03 (d,  $J$  = 7.6 Hz, 1H), 7.98 (t,  $J$  = 7.2 Hz, 1H), 7.92 (t,  $J$  = 7.4 Hz, 1H), 7.66 (d,  $J$  = 7.6 Hz, 1H), 6.99 (d,  $J$  = 8.0 Hz, 2H), 6.82 (d,  $J$  = 6.4 Hz, 2H), 4.71 (s, 1H), 3.55 (d,  $J$  = 11.2 Hz, 3H), 3.51 (d,  $J$  = 11.2 Hz, 3H), 2.21 (s, 3H). **<sup>31</sup>P NMR** (161.9 MHz, DMSO-*d*<sub>6</sub>): 10.14. **HRMS** for C<sub>20</sub>H<sub>20</sub>N<sub>2</sub>O<sub>5</sub>P<sup>+</sup>: calcd. [M+H]<sup>+</sup>: 399.1104, found: 399.1092.

**Dimethyl (4'-([1,1'-biphenyl]-4-yl)-1,3-dioxo-1,2',3,4'-tetrahydrospiro[indene-2,3'-pyrazol]-5'-yl)phosphonate (3f)**

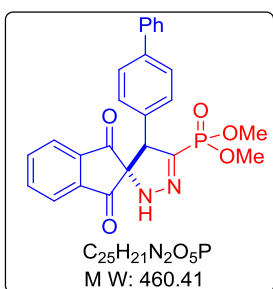

Following the general procedure, treatment of 2-([1,1'-biphenyl]-4-ylmethylene)-1H-indene-1,3(2H)-dione (50 mg, 0.16 mmol) with SGR (27 mg, 0.18 mmol) in the presence of CsF (2.0 mg, 0.016 mmol) in acetone (3 mL) at 25 °C for 1.5 h followed by column chromatography afforded the product **3f** as a yellow solid (66 mg,

90%).  $R_f$  (Acetone/Dichloromethane : 1/9) = 0.41. **Mp** 163-165 °C.  $^{13}\text{C}$  NMR (100 MHz, ppm/ $\text{CDCl}_3$ ): 197.0 (C), 195.4 (C), 142.5 (d,  $J_{\text{C-P}} = 227.4$  Hz, C), 141.6 (C), 141.3 (C), 140.2 (C), 136.7 (CH), 136.4 (CH), 130.8 (C), 130.0 (CH), 130.0 (CH), 128.9 (CH), 128.9 (CH), 127.7 (C), 127.1 (CH), 127.1 (CH), 127.0 (CH), 127.0 (CH), 124.1 (CH), 123.6 (CH), 79.2 (d,  $J_{\text{C-P}} = 4.1$  Hz, C), 65.0 (d,  $J_{\text{C-P}} = 23.8$  Hz, CH), 53.6 (d,  $J_{\text{C-P}} = 5.5$  Hz,  $\text{CH}_3$ ), 53.4 (d,  $J_{\text{C-P}} = 5.8$  Hz,  $\text{CH}_3$ ).  $^1\text{H}$  NMR (400 MHz, ppm/ $\text{CDCl}_3$ ): 8.02 (d,  $J = 7.6$  Hz, 1H), 7.84 (t,  $J = 7.6$  Hz, 1H), 7.72 (t,  $J = 7.4$  Hz, 1H), 7.59 (d,  $J = 7.6$  Hz, 1H), 7.52-7.50 (m, 2H), 7.43-7.38 (m, 4H), 7.34-7.32 (m, 1H), 7.02 (d,  $J = 8.4$  Hz, 2H), 6.78 (s, 1H), 4.82 (s, 1H), 3.69 (d,  $J = 11.6$  Hz, 3H), 3.65 (d,  $J = 11.2$  Hz, 3H).  $^{31}\text{P}$  NMR (161.9 MHz,  $\text{CDCl}_3$ ): 8.78. **HRMS** for  $\text{C}_{25}\text{H}_{22}\text{N}_2\text{O}_5\text{P}^+$ : calcd.  $[\text{M}+\text{H}]^+$ : 461.1261, found: 461.1259.

**Dimethyl (4'-(4-bromophenyl)-1,3-dioxo-1,2',3,4'-tetrahydrospiro[indene-2,3'-pyrazol]-5'-yl)phosphonate (3g)**

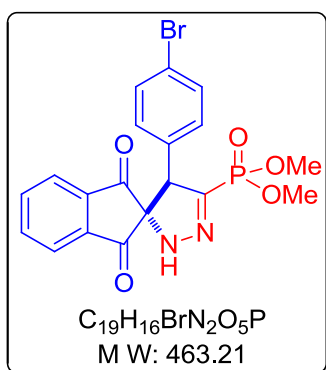

Following the general procedure, treatment of 2-(4-bromobenzylidene)-1H-indene-1,3(2H)-dione (50 mg, 0.16 mmol) with SGR (27 mg, 0.18 mmol) in the presence of  $\text{CsF}$  (2 mg, 0.016 mmol) in acetone (3 mL) at 25 °C for 1.5 h followed by column chromatography afforded the product **3g** as a yellow solid (63 mg, 85%).  $R_f$  (Acetone/Dichloromethane: 1/9) = 0.44. **Mp** 204-206 °C.  $^{13}\text{C}$  NMR (100 MHz,  $\delta$  ppm/ $\text{CDCl}_3$ ): 196.2 (C), 194.1 (C), 140.5 (C), 138.9 (C), 137.8 (d,  $J_{\text{C-P}} = 200.4$  Hz, C), 135.6 (CH), 135.4 (CH), 130.9 (C), 130.3 (CH), 130.3 (CH), 130.1 (CH), 130.1 (CH), 122.9 (CH), 122.2 (CH), 121.3 (C), 61.7 (d,  $J_{\text{C-P}} = 23.5$  Hz, CH), 52.2 (d,  $J_{\text{C-P}} = 5.6$  Hz, CH  $\text{CH}_3$ ), 52.1 (d,  $J_{\text{C-P}} = 5.6$  Hz, CH  $\text{CH}_3$ ).  $^1\text{H}$  NMR (400 MHz,  $\delta$  ppm/ $\text{CDCl}_3$ ): 8.03 (d,  $J = 7.6$  Hz, 1H), 7.88 (t,  $J = 7.0$  Hz, 1H), 7.81 (t,  $J = 7.0$  Hz, 1H), 7.66 (d,  $J = 7.6$  Hz, 1H), 7.33 (d,  $J = 8.4$  Hz, 2H), 6.86 (d,  $J = 8.4$  Hz, 2H), 6.70 (s, 1H), 4.74 (s, 1H), 3.71 (d,  $J = 11.2$  Hz, 3H), 3.67 (d,  $J = 11.2$  Hz, 3H).  $^{31}\text{P}$  NMR (161.9 MHz,  $\text{CDCl}_3$ ): 14.53. **HRMS** for  $\text{C}_{19}\text{H}_{17}\text{N}_2\text{O}_5\text{PBr}^+$ : calcd.  $[\text{M}+\text{H}]^+$ : 463.0053, found: 463.0052.

**Dimethyl(4'-(4-chlorophenyl)-2-oxo-2',4'-dihydrospiro[indoline-3,3'-pyrazol]-5'-yl)phosphonate (3h)**

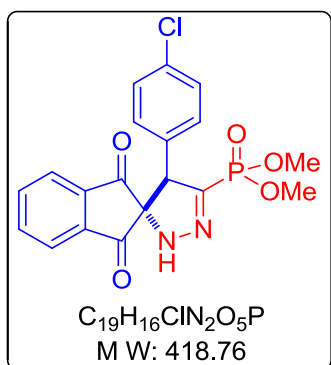

Following the general procedure, treatment of 2-(4-chlorobenzylidene)-1H-indene-1,3(2H)-dione (50 mg, 0.19 mmol) with SGR (32 mg, 0.21 mmol) in the presence of CsF (3.0 mg, 0.019 mmol) in acetone (3 mL) at 25 °C for 1.5 h followed by column chromatography afforded the product **3h** as a yellow solid (61 mg, 77%).  $R_f$  (Acetone/Dichloromethane: 1/9) = 0.49.

**Mp** 180-182 °C.  $^{13}C$  NMR (100 MHz,  $\delta$  ppm/DMSO- $d_6$ ): 197.0 (C), 194.9 (C), 141.1 (C), 139.5 (C), 138.7 (d,  $J_{C-P}$  = 227.9 Hz, C), 136.8 (CH), 136.7 (CH), 132.7 (C), 132.2 (C), 131.0 (CH), 131.0 (CH), 128.0 (CH), 128.0 (CH), 124.0 (CH), 122.9 (CH), 76.9 (d,  $J_{C-P}$  = 3.7 Hz, C), 60.9 (d,  $J_{C-P}$  = 23.6 Hz, CH), 52.9 (d,  $J_{C-P}$  = 6.2 Hz, CH<sub>3</sub>), 52.8 (d,  $J_{C-P}$  = 5.8 Hz, CH<sub>3</sub>).  $^1H$  NMR (400 MHz,  $\delta$  ppm/DMSO- $d_6$ ): 8.67 (s, 1H), 8.05-7.93 (m, 3H), 7.71 (s, 1H), 7.29 (d,  $J$  = 3.2 Hz, 2H), 7.00 (d,  $J$  = 4.0 Hz, 2H), 4.84 (s, 1H), 3.59 (d,  $J$  = 9.2 Hz, 3H), 3.55 (d,  $J$  = 6.0 Hz, 3H)  $^{31}P$  NMR (161.9 MHz, DMSO- $d_6$ ): 9.90. HRMS for  $C_{19}H_{17}N_2O_5P^{+}$ : calcd.  $[M+H]^+$ : 419.0558, found: 419.0505.

**Dimethyl (4'-(3-chlorophenyl)-2-oxo-2',4'-dihydrospiro[indoline-3,3'-pyrazol]-5'-yl)phosphonate (3i)**

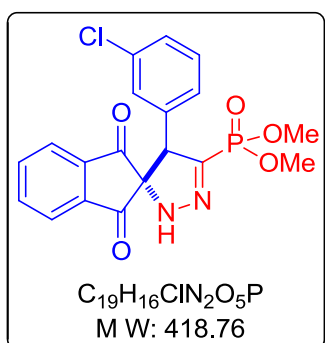

Following the general procedure, treatment of 2-(3-chlorobenzylidene)-1H-indene-1,3(2H)-dione (50 mg, 0.19 mmol) with SGR (32 mg, 0.21 mmol) in the presence of CsF (3.0 mg, 0.019 mmol) in acetone (3 mL) at 25 °C for 1.5 h followed by column chromatography afforded the product **3i** as a yellow solid (74 mg, 93%).  $R_f$  (Acetone/Dichloromethane: 1/9) = 0.44.

**Mp** 154-156 °C.  $^{13}C$  NMR (100 MHz, ppm/ $CDCl_3$ ): 196.7 (C), 195.0 (C), 142.2 (d,  $J_{C-P}$  = 228.5 Hz, C), 141.6 (C), 140.1 (C), 136.9 (CH), 136.7 (CH), 134.5 (C), 133.9 (C), 129.9 (CH), 129.6 (CH), 129.0 (CH), 127.8 (CH), 124.3 (CH), 123.7 (CH), 78.6 (d,  $J_{C-P}$  = 3.8 Hz, C), 64.4 (d,  $J_{C-P}$  = 23.7 Hz, CH), 53.7 (d,  $J_{C-P}$  = 5.9 Hz, CH<sub>3</sub>), 53.4 (d,  $J_{C-P}$  = 5.8 Hz, CH<sub>3</sub>).  $^1H$  NMR (400 MHz, ppm/ $CDCl_3$ ): 8.01 (d,  $J$  = 7.6 Hz, 1H), 7.87 (t,  $J$  = 7.4 Hz, 1H), 7.78 (t,  $J$  = 7.6 Hz, 1H), 7.62 (d,  $J$

= 7.6 Hz, 1H), 7.18-7.11 (m, 2H), 6.93-6.86 (m, 3H), 4.67 (s, 1H), 3.67 (d,  $J = 11.6$  Hz, 3H), 3.62 (d,  $J = 11.2$  Hz, 3H).  $^{31}\text{P}$  NMR (161.9 MHz,  $\text{CDCl}_3$ ): 8.55. HRMS for  $\text{C}_{19}\text{H}_{17}\text{N}_2\text{O}_5\text{P}^+$ : calcd.  $[\text{M}+\text{H}]^+$ : 419.0558, found: 419.0572.

**Dimethyl (4'-(3-methoxyphenyl)-1,3-dioxo-1,2',3,4'-tetrahydrospiro[indene-2,3'-pyrazol]-5'-yl)phosphonate (3j)**

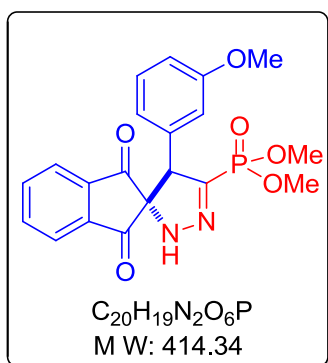

Following the general procedure, treatment of 2-(3-methoxybenzylidene)-1H-indene-1,3(2H)-dione (50 mg, 0.19 mmol) with SGR (32 mg, 0.21 mmol) in the presence of CsF (3.0 mg, 0.019 mmol) in acetone (3 mL) at 25 °C for 1.5 h followed by column chromatography afforded the product **3j** as a yellow solid (67 mg, 86%).  $R_f$  (Acetone/Dichloromethane: 1/9) = 0.44. **Mp** 134-136 °C.  $^{13}\text{C}$  NMR (100 MHz, ppm/ $\text{CDCl}_3$ ): 197.1 (C), 195.3 (C), 159.5 (C), 142.3 (d,  $J_{\text{C-P}} = 227.6$  Hz, C), 141.6 (C), 140.2 (C), 136.6 (CH), 136.3 (CH), 133.1 (C), 129.5 (CH), 124.0 (CH), 123.5 (CH), 121.8 (CH), 114.8 (CH), 114.6 (CH), 79.2 (d,  $J_{\text{C-P}} = 4.4$  Hz, C), 65.2 (d,  $J_{\text{C-P}} = 23.8$  Hz, CH), 55.2 ( $\text{CH}_3$ ), 53.5 (d,  $J_{\text{C-P}} = 5.7$  Hz,  $\text{CH}_3$ ), 53.3 (d,  $J_{\text{C-P}} = 6.1$  Hz,  $\text{CH}_3$ ).  $^1\text{H}$  NMR (400 MHz, ppm/ $\text{CDCl}_3$ ): 7.95 (d,  $J = 7.6$  Hz, 1H), 7.80 (t,  $J = 7.2$  Hz, 1H), 7.72 (t,  $J = 7.4$  Hz, 1H), 7.54 (d,  $J = 7.6$  Hz, 1H), 7.02 (t,  $J = 7.8$  Hz, 1H), 6.96 (s, 1H), 6.8 (d,  $J = 8.4$  Hz, 1H), 6.46 (d,  $J = 10.4$  Hz, 2H), 4.67 (s, 1H), 3.64 (s, 3H), 3.61 (d,  $J = 5.6$  Hz, 3H), 3.61 (d,  $J = 6.0$  Hz, 3H).  $^{31}\text{P}$  NMR (161.9 MHz,  $\text{CDCl}_3$ ): 9.08. HRMS for  $\text{C}_{20}\text{H}_{20}\text{N}_2\text{O}_6\text{P}^+$ : calcd.  $[\text{M}+\text{H}]^+$ : 415.1053, found: 415.1053.

**Dimethyl (1,3-dioxo-4'-(o-tolyl)-1,2',3,4'-tetrahydrospiro[indene-2,3'-pyrazol]-5'-yl)phosphonate (3k)**

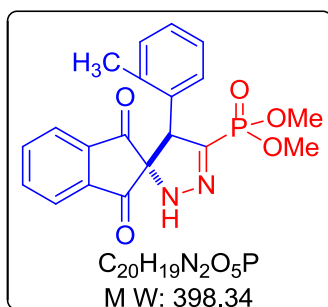

Following the general procedure, treatment of 2-(2-methylbenzylidene)-1H-indene-1,3(2H)-dione (50 mg, 0.20 mmol) with SGR (33 mg, 0.22 mmol) in the presence of CsF (3.0 mg, 0.02 mmol) in acetone (3 mL) at 25 °C for 1.5 h followed by column chromatography afforded the product **3k** as a yellow solid (70 mg, 88%).  $R_f$  (Acetone/Dichloromethane: 1/9) = 0.44. **Mp** 160-162 °C.  $^{13}\text{C}$  NMR (100 MHz, ppm/ $\text{CDCl}_3$ ): 197.3 (C), 195.3 (C), 142.8 (d,  $J_{\text{C-P}} = 227.6$  Hz, C), 141.3 (C), 140.1 (C), 136.7 (CH), 136.3 (CH), 135.9 (C), 130.9 (CH), 130.3 (CH), 129.9

(C), 128.5 (CH), 126.3 (CH), 123.8 (CH), 123.3 (CH), 78.7 (d,  $J_{C-P}$  = 4.5 Hz, C), 60.7 (d,  $J_{C-P}$  = 23.9 Hz, CH), 53.5 (d,  $J_{C-P}$  = 5.7 Hz, CH<sub>3</sub>), 53.2 (d,  $J_{C-P}$  = 6.1 Hz, CH<sub>3</sub>), 19.4 (CH<sub>3</sub>). **<sup>1</sup>H NMR** (400 MHz, ppm/CDCl<sub>3</sub>): 7.99 (d,  $J$  = 7.6 Hz, 1H), 7.83 (t,  $J$  = 7.4 Hz, 1H), 7.74 (d,  $J$  = 7.6 Hz, 1H), 7.56 (d,  $J$  = 7.6 Hz, 1H), 7.17 (d,  $J$  = 7.4 Hz, 1H), 7.12-7.03 (m, 2H), 6.86 (d,  $J$  = 7.6 Hz, 1H), 6.84 (s, 1H), 5.01 (s, 1H), 3.62 (d,  $J$  = 11.2 Hz, 3H), 3.56 (d,  $J$  = 11.2 Hz, 3H) 1.76 (s, 3H). **<sup>31</sup>P NMR** (161.9 MHz, CDCl<sub>3</sub>): 9.02. **HRMS** for C<sub>20</sub>H<sub>20</sub>N<sub>2</sub>O<sub>5</sub>P<sup>+</sup>: calcd. [M+H]<sup>+</sup>: 399.1104, found: 399.1103. **CCDC No.** 1547228.

**Dimethyl (4'-(3,4-dimethoxyphenyl)-1,3-dioxo-1,2',3,4'-tetrahydrospiro[indene-2,3'-pyrazol]-5'-yl)phosphonate (3l)**

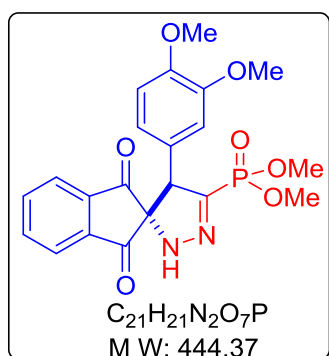

Following the general procedure, treatment of 2-(3,4-dimethoxybenzylidene)-1H-indene-1,3(2H)-dione (50 mg, 0.17 mmol) with SGR (29 mg, 0.19 mmol) in the presence of CsF (3.0 mg, 0.017 mmol) in acetone (3 mL) at 25 °C for 1.5 h followed by column chromatography afforded the product **3l** as a yellow solid (49 mg, 65%). **R<sub>f</sub>** (Acetone/Dichloromethane: 2/8) = 0.42. **Mp** 184-186 °C. **<sup>13</sup>C NMR** (100 MHz, ppm/CDCl<sub>3</sub>): 197.3 (C), 195.6 (C),

149.1 (C), 148.7 (C), 142.6 (d,  $J_{C-P}$  = 227.6 Hz, C), 141.5 (C), 140.4 (C), 136.6 (CH), 136.2 (CH), 124.0 (C), 123.9 (CH), 123.5 (CH), 122.1 (CH), 112.7 (CH), 110.7 (CH), 79.4 (d,  $J_{C-P}$  = 4.3 Hz, C), 65.3 (d,  $J_{C-P}$  = 24.0 Hz, CH), 55.9 (CH<sub>3</sub>), 55.7 (CH<sub>3</sub>), 53.6 (d,  $J_{C-P}$  = 5.7 Hz, CH<sub>3</sub>), 53.4 (d,  $J_{C-P}$  = 6.0 Hz, CH<sub>3</sub>). **<sup>1</sup>H NMR** (400 MHz, ppm/CDCl<sub>3</sub>): 7.99 (d,  $J$  = 7.6 Hz, 1H), 7.83 (t,  $J$  = 7.2 Hz, 1H), 7.75 (t,  $J$  = 7.4 Hz, 1H), 7.59 (d,  $J$  = 7.6 Hz, 1H), 6.75 (s, 1H), 6.61 (d,  $J$  = 8.8 Hz, 1H), 6.48-6.46 (m, 2H), 4.75 (s, 1H), 3.77 (s, 3H), 3.72 (s, 3H), 3.67 (d,  $J$  = 6.0 Hz, 3H), 3.64 (d,  $J$  = 6.0 Hz, 3H). **<sup>31</sup>P NMR** (161.9 MHz, CDCl<sub>3</sub>): 9.13. **HRMS** for C<sub>21</sub>H<sub>22</sub>N<sub>2</sub>O<sub>7</sub>P<sup>+</sup>: calcd. [M+H]<sup>+</sup>: 445.1159, found: 445.1152.

**Dimethyl (1,3-dioxo-4'-(3,4,5-trimethoxyphenyl)-1,2',3,4'-tetrahydrospiro[indene-2,3'-pyrazol]-5'-yl)phosphonate (3m)**

Following the general procedure, treatment of 2-(3,4,5 trimethoxybenzylidene)-1H-indene-1,3(2H)-dione (50 mg, 0.15 mmol) with SGR (26 mg, 0.17 mmol) in the presence of CsF (2.0

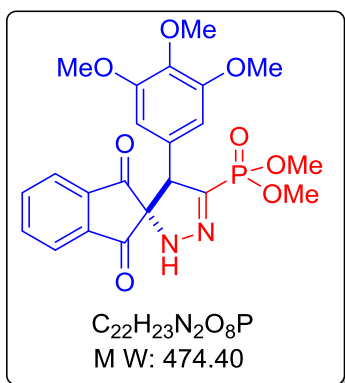

mg, 0.015 mmol) in acetone (3 mL) at 25 °C for 1.5 h followed by column chromatography afforded the product **3m** as a yellow solid (57 mg, 80%).  $R_f$ (Acetone/Dichloromethane: 2/8) = 0.48. **Mp** 180-182 °C.  $^{13}C$  NMR (100 MHz, ppm/ $CDCl_3$ ): 197.3 (C), 195.6 (C), 152.9 (C), 152.9 (C), 142.0 (d,  $J_{C-P}$  = 228.0 Hz, C), 141.5 (C), 140.6 (C), 137.9 (C), 136.7 (CH), 136.1 (CH), 127.0 (C), 123.7 (CH), 123.5 (CH), 106.9 (CH), 106.9 (CH), 79.8 (d,  $J_{C-P}$  = 4.0 Hz, C),

65.6 (d,  $J_{C-P}$  = 24.0 Hz, CH), 60.8 (CH<sub>3</sub>), 56.6 (CH<sub>3</sub>), 56.6 (CH<sub>3</sub>), 53.6 (d,  $J_{C-P}$  = 5.6 Hz, CH<sub>3</sub>), 53.3 (d,  $J_{C-P}$  = 6.1 Hz, CH<sub>3</sub>).  $^1H$  NMR (400 MHz, ppm/ $CDCl_3$ ): 7.95 (d,  $J$  = 7.6 Hz, 1H), 7.80 (t,  $J$  = 7.4 Hz, 1H), 7.72 (t,  $J$  = 7.4 Hz, 1H), 7.55 (d,  $J$  = 7.6 Hz, 1H), 6.95 (s, 1H), 6.09 (s, 2H), 4.70 (s, 1H), 3.68 (s, 3H), 3.66 (d,  $J$  = 5.2 Hz, 3H), 3.63 (d,  $J$  = 5.2 Hz, 3H), 3.61 (s, 6H).  $^{31}P$  NMR (161.9 MHz,  $CDCl_3$ ): 9.10. **HRMS** for  $C_{22}H_{24}N_2O_8P^+$ : calcd.  $[M+H]^+$ : 475.1265, found: 475.1277.

#### Dimethyl (1,3-dioxo-4'-(1H-pyrrol-2-yl)-1,2',3,4'-tetrahydrospiro[indene-2,3'-pyrazol]-5'-yl)phosphonate (**3n**)

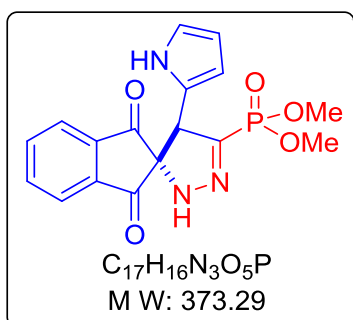

Following the general procedure, treatment of 2-(pyrrole-2-ylmethylene)-1H-indene-1,3(2H)-dione (50 mg, 0.22 mmol) with SGR (38 mg, 0.25 mmol) in the presence of CsF (3.0 mg, 0.022 mmol) in acetone (3 mL) at 25 °C for 1.5 h followed by column chromatography afforded the product **3n** as a yellow solid (66 mg, 80%).  $R_f$ (Acetone/Dichloromethane: 2/8) = 0.3.

**Mp** 176-178 °C.  $^{13}C$  NMR (100 MHz, ppm/  $DMSO-d_6$ ): 198.8 (C), 151.9 (C), 136.9 (C), 134.3 (d,  $J_{C-P}$  = 232.0 Hz, C), 132.5 (C), 131.6 (C), 131.0 (CH), 124.9 (CH), 123.6 (CH), 114.6 (CH), 113.1 (CH), 100.7 (CH), 92.3 (CH), 87.0 (d,  $J_{C-P}$  = 4.2 Hz, C), 56.0 (d,  $J_{C-P}$  = 24.2 Hz, CH), 52.9 (d,  $J_{C-P}$  = 5.7 Hz, CH<sub>3</sub>), 52.8 (d,  $J_{C-P}$  = 5.8 Hz, CH<sub>3</sub>).  $^1H$  NMR (400 MHz, ppm/ $DMSO-d_6$ ): 9.17 (s, 1H), 8.10 (d,  $J$  = 7.6 Hz, 1H), 7.87 (t,  $J$  = 7 Hz, 1H), 7.67 (d,  $J$  = 7.6 Hz, 1H), 7.68-7.62 (m, 2H), 7.24 (s, 1H), 6.20 (s, 1H), 5.74 (s, 1H), 4.73 (s, 1H), 3.68 (d,  $J$  = 11.2 Hz, 3H), 3.65 (d,  $J$  = 11.2 Hz, 3H).  $^{31}P$  NMR (161.9 MHz,  $DMSO-d_6$ ): 11.10. **HRMS** for  $C_{17}H_{17}N_3O_5P^+$ : calcd.  $[M+H]^+$ : 374.0900, found: 374.0889.

**Dimethyl (1,3-dioxo-4'-(thiophen-2-yl)-1,2',3,4'-tetrahydrospiro[indene-2,3'-pyrazol]-5'-yl)phosphonate (3o)**

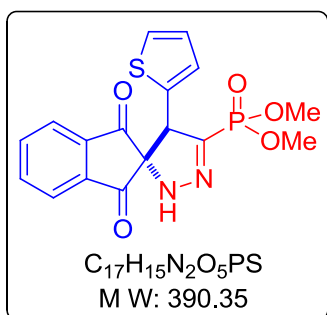

Following the general procedure, treatment of 2-(thiophen-2-ylmethylene)-1H-indene-1,3(2H)-dione (50 mg, 0.21 mmol) with SGR (35 mg, 0.23 mmol) in the presence of CsF (3.0 mg, 0.021 mmol) in acetone (3 mL) at 25 °C for 1.5 h followed by column chromatography afforded the product **3o** as a yellow solid (71 mg, 87%).  $R_f$  (Acetone/Dichloromethane: 1/9) = 0.41. **Mp** 172-174 °C.  $^{13}C$  NMR (100 MHz, ppm/ DMSO- $d_6$ ): 197.2 (C), 194.7 (C), 141.0 (C), 140.0 (C), 139.1 (C), 136.9 (CH), 136.7 (CH), 134.3 (C), 128.6 (CH), 126.9 (CH), 126.8 (CH), 123.8 (CH), 123.0 (CH), 77.6 (d,  $J_{C-P}$  = 3.7 Hz, C), 56.7 (d,  $J_{C-P}$  = 23.6 Hz, CH), 53.0 (d,  $J_{C-P}$  = 6.1 Hz, CH<sub>3</sub>), 52.9 (d,  $J_{C-P}$  = 5.8 Hz, CH<sub>3</sub>).  $^1H$  NMR (400 MHz, ppm/DMSO- $d_6$ ): 8.68 (s, 1H), 8.06-7.92 (m, 3H), 7.76 (d,  $J$  = 7.6 Hz, 1H), 7.37 (d,  $J$  = 5.2 Hz, 1H), 6.90-6.88 (m, 1H), 6.77 (d,  $J$  = 3.2 Hz, 1H), 5.14 (s, 1H), 3.61 (d,  $J$  = 11.2 Hz, 3H), 3.57 (d,  $J$  = 11.6 Hz, 3H).  $^{31}P$  NMR (161.9 MHz, DMSO- $d_6$ ): 14.35. **HRMS** for  $C_{17}H_{16}N_2O_5PS^+$ : calcd.  $[M+H]^+$ : 391.0512, found: 391.0501.

**Dimethyl (4'-(naphthalen-1-yl)-1,3-dioxo-1,2',3,4'-tetrahydrospiro[indene-2,3'-pyrazol]-5'-yl)phosphonate (3p)**

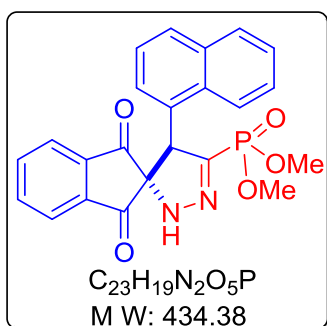

Following the general procedure, treatment of 2-(naphthalen-1-ylmethylene)-1H-indene-1,3(2H)-dione (50 mg, 0.18 mmol) with SGR (30 mg, 0.20 mmol) in the presence of CsF (3.0 mg, 0.02 mmol) in acetone (3 mL) at 25 °C for 1.5 h followed by column chromatography afforded the product **3p** as a yellow solid (69 mg, 89%).  $R_f$  (Acetone/Dichloromethane: 1/9) = 0.44. **Mp** 208-210 °C.  $^{13}C$  NMR (100 MHz, ppm/ $CDCl_3$ ): 197.7 (C), 195.5 (C), 143.0 (d,  $J_{C-P}$  = 228.0 Hz, C), 141.0 (C), 140.6 (C), 136.5 (CH), 136.0 (CH), 133.6 (C), 131.1 (C), 129.6 (CH), 129.3 (CH), 129.0 (CH), 127.4 (C), 126.3 (CH), 125.5 (CH), 125.3 (CH), 123.6 (CH), 123.1 (CH), 122.1 (C), 79.0 (d,  $J_{C-P}$  = 3.8 Hz, C), 59.6 (d,  $J_{C-P}$  = 23.5 Hz, CH), 53.5 (d,  $J_{C-P}$  = 5.7 Hz, CH<sub>3</sub>), 53.4 (d,  $J_{C-P}$  = 5.7 Hz, CH<sub>3</sub>).  $^1H$  NMR (400 MHz, ppm/ $CDCl_3$ ): 7.91 (d,  $J$  = 7.6 Hz, 1H), 7.71-7.64 (m, 3H), 7.53-7.46 (m, 2H), 7.42 (d,  $J$  = 6.8 Hz, 1H), 7.35 (d,  $J$  = 8.4 Hz, 1H), 7.12-7.03 (m, 2H), 7.11-7.07 (m, 1H), 6.83 (s, 1H), 5.73 (s, 1H), 3.69 (d,  $J$  = 11.6 Hz, 3H), 3.61 (d,  $J$  =

11.2 Hz, 3H). <sup>31</sup>P NMR (161.9 MHz, CDCl<sub>3</sub>): 8.98. HRMS for C<sub>23</sub>H<sub>20</sub>N<sub>2</sub>O<sub>5</sub>P<sup>+</sup>: calcd. [M+H]<sup>+</sup>: 435.1104, found: 435.1089.

**Dimethyl (1,3-dioxo-4'-(ferrocenyl)-1,2',3,4'-tetrahydrospiro[indene-2,3'-pyrazol]-5'-yl)phosphonate (3q)**

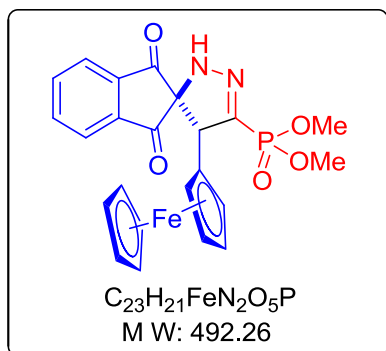

Following the general procedure, treatment of 2-(ferrocenyldiene)-1H-indene-1,3(2H)-dione (50 mg, 0.15 mmol) with SGR (25 mg, 0.17 mmol) in the presence of CsF (2.0 mg, 0.02 mmol) in acetone (3 mL) at 25 °C for 1.5 h followed by column chromatography afforded the product **3q** as a yellow solid (64 mg, 87%). *R<sub>f</sub>* (Acetone/Dichloromethane : 1/9) = 0.44. **Mp** 220-222 °C. <sup>13</sup>C

NMR (100 MHz, ppm/ DMSO-*d*<sub>6</sub>): 197.9 (C), 195.7 (C), 141.2 (C), 140.2 (C), 137.2 (d, *J*<sub>C-P</sub> = 226.1 Hz, C), 136.8 (CH), 136.3 (CH), 123.3 (CH), 122.7 (CH), 80.3 (CH), 77.0 (d, *J*<sub>C-P</sub> = 4.1 Hz, C), 69.2 (CH), 68.3 (CH), 68.3 (CH), 68.3 (CH), 68.3 (CH), 68.3 (CH), 67.1 (CH), 66.7 (CH), 66.1 (CH), 57.2 (d, *J*<sub>C-P</sub> = 24.0 Hz, CH), 52.7 (d, *J*<sub>C-P</sub> = 6.4 Hz, CH<sub>3</sub>), 52.4 (d, *J*<sub>C-P</sub> = 5.7 Hz, CH<sub>3</sub>). <sup>1</sup>H NMR (400 MHz, ppm/DMSO-*d*<sub>6</sub>): 8.66 (s, 1H), 8.11 (s, 1H), 8.06 (s, 2H), 7.92 (s, 1H), 4.74 (s, 1H), 4.19 (s, 1H), 4.12 (s, 1H), 3.94 (s, 6H), 3.71 (d, *J* = 11.2 Hz, 3H), 3.65 (d, *J* = 11.2 Hz, 3H) 3.45 (s, 1H). <sup>31</sup>P NMR (161.9 MHz, DMSO-*d*<sub>6</sub>): 11.14. HRMS for C<sub>23</sub>H<sub>22</sub>N<sub>2</sub>O<sub>5</sub>PFe<sup>+</sup>: calcd. [M+H]<sup>+</sup>: 493.0610, found: 493.0598.

**Dimethyl (4-phenyl)-3-(3-oxo-1,3-dihydroisobenzofuran-1-yl)-1H-pyrazol-5-yl)phosphonate (4a)**

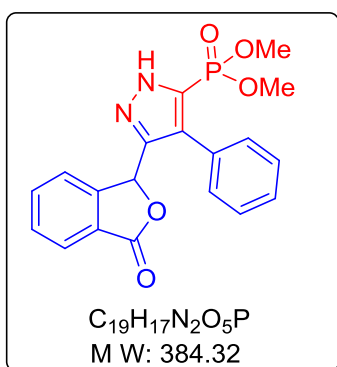

Following the general procedure, treatment of 2-(benzylidene)-1H-indene-1,3(2H)-dione (50 mg, 0.21 mmol) with SGR (48 mg, 0.32 mmol) in the presence of NaOH (21.0 mg, 0.53 mmol) in MeOH (3 mL) at 25 °C for 1.5 h followed by column chromatography afforded the product **4a** as a yellow solid (69 mg, 86%). *R<sub>f</sub>* (Acetone/Dichloromethane: 2/8) = 0.42. **Mp** 162-164 °C. <sup>13</sup>C NMR (100 MHz, ppm/CDCl<sub>3</sub>): 170.3 (C), 148.1 (C),

146.0 (C), 134.1 (CH), 130.0 (CH), 130.0 (CH), 129.9 (C), 129.3 (CH), 128.5 (C), 128.3 (C), 128.2 (CH), 128.2 (CH), 128.2 (CH), 126.3 (C), 125.4 (CH), 123.1 (CH), 76.0 (CH), 53.4 (CH<sub>3</sub>),



53.4 (CH<sub>3</sub>). <sup>1</sup>H NMR (400 MHz, ppm/CDCl<sub>3</sub>): 12.70 (s, 1H), 7.76 (d, *J* = 7.6 Hz, 1H), 7.61 (t, *J* = 7.6 Hz, 1H), 7.47 (t, *J* = 7.6 Hz, 1H), 7.33-7.27 (m, 6H), 6.53 (s, 1H), 3.67 (d, *J* = 11.6 Hz, 3H), 3.58 (d, *J* = 11.6 Hz, 3H). <sup>31</sup>P NMR (161.9 MHz, CDCl<sub>3</sub>): 8.52. HRMS for C<sub>19</sub>H<sub>18</sub>N<sub>2</sub>O<sub>5</sub>P<sup>+</sup>: calcd. [M+H]<sup>+</sup>: 385.0948, found: 385.0944.

**Dimethyl (4-(4-(allyloxy)phenyl)-3-(3-oxo-1,3-dihydroisobenzofuran-1-yl)-1H-pyrazol-5-yl)phosphonate (4b)**

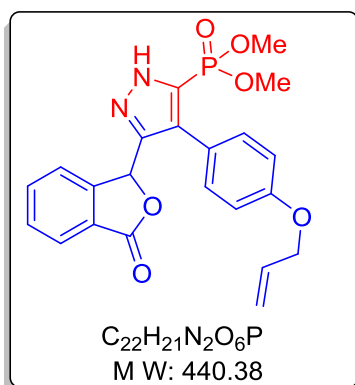

Following the general procedure, treatment of 2-(4-(allyloxy)benzylidene)-1H-indene-1,3(2H)-dione (50 mg, 0.17 mmol) with SGR (39.0 mg, 0.26 mmol) in the presence of NaOH (17.0 mg, 0.43 mmol) in MeOH (3 mL) at 25 °C for 1.5 h followed by column chromatography afforded the product **4b** as a yellow solid (55 mg, 73%). *R<sub>f</sub>* (Acetone/Dichloromethane: 2/8) = 0.31. *Mp* 142-144 °C. <sup>13</sup>C NMR (100 MHz, ppm/CDCl<sub>3</sub>): 170.3 (C), 158.5 (C), 148.1 (C), 134.1 (CH), 133.2 (CH), 131.2 (CH), 131.2 (CH), 129.3 (CH), 128.3 (C), 128.1 (C), 126.3 (C), 125.4 (CH), 123.1 (CH), 122.1 (C), 117.9 (CH<sub>2</sub>), 114.5 (CH), 114.5 (CH), 76.0 (CH), 68.8 (CH<sub>2</sub>), 53.4 (CH<sub>3</sub>), 53.4 (CH<sub>3</sub>). <sup>1</sup>H NMR (400 MHz, ppm/CDCl<sub>3</sub>): 12.83 (s, 1H), 7.75 (d, *J* = 7.6 Hz, 1H), 7.56 (t, *J* = 7.4 Hz, 1H), 7.44 (t, *J* = 7.4 Hz, 1H), 7.28 (d, *J* = 7.6 Hz, 1H), 7.17 (d, *J* = 8.4 Hz, 2H), 6.83 (d, *J* = 8.4 Hz, 2H), 6.48 (s, 1H), 6.07-6.01 (m, 1H), 5.36 (dd, *J* = 48.0, 11.2 Hz, 2H), 4.52 (d, *J* = 4.8 Hz, 2H), 3.64 (d, *J* = 11.6 Hz, 3H), 3.56 (d, *J* = 11.6 Hz, 3H). <sup>31</sup>P NMR (161.9 MHz, CDCl<sub>3</sub>): 8.88. HRMS for C<sub>22</sub>H<sub>22</sub>N<sub>2</sub>O<sub>6</sub>P<sup>+</sup>: calcd. [M+H]<sup>+</sup>: 441.1210, found: 441.1211.

**Dimethyl (4-(4-methoxyphenyl)-3-(3-oxo-1,3-dihydroisobenzofuran-1-yl)-1H-pyrazol-5-yl)phosphonate (4c)**

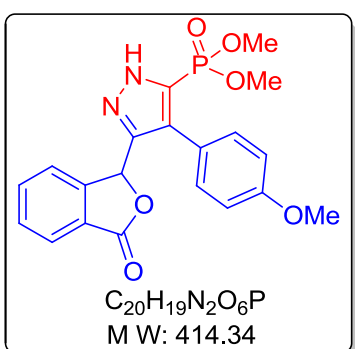

Following the general procedure, treatment of 2-(4-methoxybenzylidene)-1H-indene-1,3(2H)-dione (50 mg, 0.19 mmol) with SGR (44.0 mg, 0.29 mmol) in the presence of NaOH (19.0 mg, 0.48 mmol) in MeOH (3 mL) at 25 °C for 1.5 h followed by column chromatography afforded the product **4c** as a yellow solid (46 mg, 58%). *R<sub>f</sub>* (Acetone/Dichloromethane:

2/8) = 0.44. **Mp** 170-172 °C. **<sup>13</sup>C NMR** (100 MHz, ppm/CDCl<sub>3</sub>): 170.3 (C), 159.5 (C), 148.1 (C), 145.9 (C), 134.0 (CH), 131.2 (CH), 131.2 (CH), 129.3 (CH), 128.3 (C), 128.2 (C), 126.3 (C), 125.4 (CH), 123.1 (CH), 121.9 (C), 113.7 (CH), 113.7 (CH), 75.9 (CH), 55.3 (CH<sub>3</sub>), 53.3 (CH<sub>3</sub>), 53.3 (CH<sub>3</sub>). **<sup>1</sup>H NMR** (400 MHz, ppm/CDCl<sub>3</sub>): 7.76 (d, *J* = 7.6 Hz, 1H), 7.59 (t, *J* = 7.4 Hz, 1H), 7.46 (t, *J* = 7.4 Hz, 1H), 7.31 (d, *J* = 7.6 Hz, 1H), 7.20 (d, *J* = 8.4 Hz, 2H), 6.84 (d, *J* = 8.8 Hz, 2H), 6.51 (s, 1H), 3.82 (s, 3H), 3.67 (d, *J* = 11.6 Hz, 3H), 3.58 (d, *J* = 11.6 Hz, 3H). **<sup>31</sup>P NMR** (161.9 MHz, CDCl<sub>3</sub>): 9.01. **HRMS** for C<sub>20</sub>H<sub>20</sub>N<sub>2</sub>O<sub>6</sub>P<sup>+</sup>: calcd. [M+H]<sup>+</sup>: 415.1053, found: 415.1046.

**Dimethyl (3-(3-oxo-1,3-dihydroisobenzofuran-1-yl)-4-(4-phenoxyphenyl)-1H-pyrazol-5-yl)phosphonate (4d)**

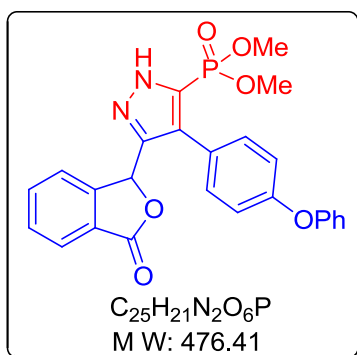

Following the general procedure, treatment of 2-(4-phenoxybenzylidene)-1H-indene-1,3(2H)-dione (50 mg, 0.15 mmol) with SGR (35 mg, 0.23 mmol) in the presence of NaOH (15.0 mg, 0.38 mmol) in MeOH (3 mL) at 25 °C for 1.5 h followed by column chromatography afforded the product **4d** as a yellow solid (56 mg, 79%). **R<sub>f</sub>**(Acetone/Dichloromethane: 2/8) = 0.38. **Mp** 167-169 °C. **<sup>13</sup>C NMR** (100 MHz, ppm/CDCl<sub>3</sub>):

170.2 (C), 157.1 (C), 156.9 (C), 148.0 (C), 134.1 (CH), 131.6 (C), 129.9 (CH), 129.9 (CH), 129.6 (CH), 129.4 (CH), 127.6 (C), 127.4 (C), 126.3 (C), 125.4 (CH), 124.9 (CH), 123.6 (CH), 123.1 (CH), 120.1 (CH), 119.1 (CH), 119.1 (CH), 118.5 (CH), 76.1 (CH), 53.4 (d, *J*<sub>C-P</sub> = 4.9 Hz, CH<sub>3</sub>), 53.4 (d, *J*<sub>C-P</sub> = 4.9 Hz, CH<sub>3</sub>). **<sup>1</sup>H NMR** (400 MHz, ppm/CDCl<sub>3</sub>): 12.95 (s, 1H), 7.80 (d, *J* = 7.6 Hz, 1H), 7.63 (t, *J* = 7.2 Hz, 1H), 7.51 (t, *J* = 7.6 Hz, 1H), 7.39-7.28 (m, 4H), 7.15 (t, *J* = 7.4 Hz, 1H), 7.02-6.96 (m, 4H), 6.82 (s, 1H), 6.56 (s, 1H), 3.63 (d, *J* = 11.6 Hz, 3H), 3.59 (d, *J* = 11.6 Hz, 3H). **<sup>31</sup>P NMR** (161.9 MHz, CDCl<sub>3</sub>): 8.43. **HRMS** for C<sub>25</sub>H<sub>22</sub>N<sub>2</sub>O<sub>6</sub>P<sup>+</sup>: calcd. [M+H]<sup>+</sup>: 477.1210, found: 477.1234.

**Dimethyl (4-(4-(tert-butyl)phenyl)-3-(3-oxo-1,3-dihydroisobenzofuran-1-yl)-1H-pyrazol-5-yl)phosphonate (4e)**

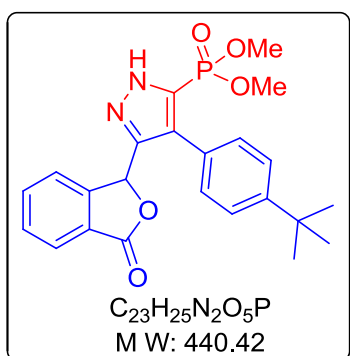

Following the general procedure, treatment of 2-(4-(tert-butyl)benzylidene)-1H-indene-1,3(2H)-dione (50 mg, 0.17 mmol) with SGR (39 mg, 0.26 mmol) in the presence of NaOH (17.0 mg, 0.43 mmol) in MeOH (3 mL) at 25 °C for 1.5 h followed by column chromatography afforded the product **4e** as a yellow solid (58 mg, 77%).  $R_f$ (Acetone/Dichloromethane : 2/8) = 0.41. **Mp** 190-192 °C.  $^{13}\text{C}$  NMR (100 MHz, ppm/ $\text{CDCl}_3$ ): 170.3 (C), 151.1 (C), 148.1 (C), 134.0 (CH), 129.7 (CH), 129.7 (CH), 129.3 (C), 128.7 (C), 128.5 (C), 126.7 (C), 126.5 (CH), 125.4 (CH), 125.1 (CH), 125.1 (CH), 123.2 (CH), 76.0 (CH), 53.4 (CH<sub>3</sub>), 53.4 (CH<sub>3</sub>), 34.7 (C), 31.4 (CH<sub>3</sub>), 31.4 (CH<sub>3</sub>), 31.4 (CH<sub>3</sub>).  $^1\text{H}$  NMR (400 MHz, ppm/ $\text{CDCl}_3$ ): 12.64 (s, 1H), 7.73 (d,  $J$  = 7.6 Hz, 1H), 7.57 (t,  $J$  = 7.4 Hz, 1H), 7.43 (t,  $J$  = 7.6 Hz, 1H), 7.29 (t,  $J$  = 7.8 Hz, 3H), 7.20 (d,  $J$  = 8.0 Hz, 2H), 6.50 (s, 1H), 3.65 (d,  $J$  = 11.6 Hz, 3H), 3.57 (d,  $J$  = 11.6 Hz, 3H), 1.31 (s, 9 H).  $^{31}\text{P}$  NMR (161.9 MHz,  $\text{CDCl}_3$ ): 8.88. **HRMS** for  $\text{C}_{23}\text{H}_{26}\text{N}_2\text{O}_5\text{P}^+$ : calcd.  $[\text{M}+\text{H}]^+$ : 441.1574, found: 441.1570.

**Dimethyl (4-(4-(isopropyl)phenyl)-3-(3-oxo-1,3-dihydroisobenzofuran-1-yl)-1H-pyrazol-5-yl)phosphonate (4f)**

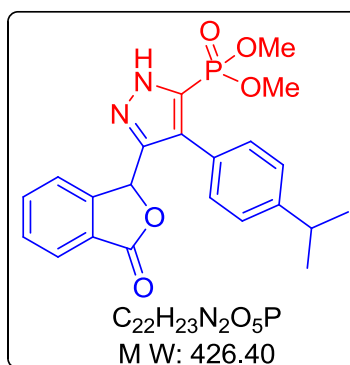

Following the general procedure, treatment of 2-(4-(isopropyl)benzylidene)-1H-indene-1,3(2H)-dione (50 mg, 0.18 mmol) with SGR (41 mg, 0.27 mmol) in the presence of NaOH (18.0 mg, 0.45 mmol) in MeOH (3 mL) at 25 °C for 1.5 h followed by column chromatography afforded the product **4f** as a yellow solid (61 mg, 80%).  $R_f$ (Acetone/Dichloromethane: 2/8) = 0.44. **Mp** 178-180 °C.  $^{13}\text{C}$  NMR (100 MHz, ppm/ $\text{CDCl}_3$ ): 170.3 (C), 148.8 (C), 148.1 (C), 134.0 (CH), 129.9 (CH), 129.9 (CH), 129.2 (CH), 128.7 (C), 128.5 (C), 127.1 (C), 126.3 (C), 126.3 (CH), 126.3 (CH), 125.3 (CH), 123.1 (CH), 76.0 (CH), 53.4 (d,  $J_{\text{C-P}}$  = 5.1 Hz, CH<sub>3</sub>), 53.3 (d,  $J_{\text{C-P}}$  = 18.0 Hz, CH<sub>3</sub>), 33.9 (CH), 24.0 (CH<sub>3</sub>), 24.0 (CH<sub>3</sub>).  $^1\text{H}$  NMR (400 MHz, ppm/ $\text{CDCl}_3$ ): 12.72 (s, 1H), 7.72 (d,  $J$  = 7.6 Hz, 1H), 7.56 (t,  $J$  = 7.6 Hz, 1H), 7.42 (t,  $J$  = 7.4 Hz, 1H), 7.27 (s, 1H), 7.17 (d,  $J$  = 8.4 Hz, 2H), 7.12 (d,  $J$  = 8.4 Hz, 2H), 6.48 (s, 1H), 3.64

(d,  $J = 11.6$  Hz, 3H), 3.55 (d,  $J = 11.6$  Hz, 3H), 2.92-2.85 (m, 1H), 1.23 (d,  $J = 7.2$  Hz, 6H).  $^{31}\text{P}$  NMR (161.9 MHz,  $\text{CDCl}_3$ ): 8.85. HRMS for  $\text{C}_{22}\text{H}_{24}\text{N}_2\text{O}_5\text{P}^+$ : calcd.  $[\text{M}+\text{H}]^+$ : 427.1417, found: 427.1426.

**Dimethyl (4-(4-(ethyl)phenyl)-3-(3-oxo-1,3-dihydroisobenzofuran-1-yl)-1H-pyrazol-5-yl)phosphonate (4g)**

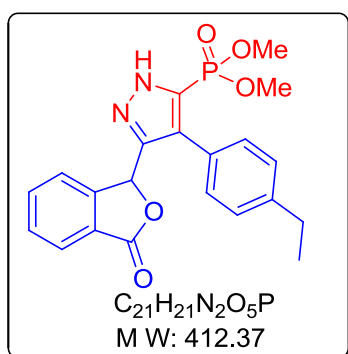

Following the general procedure, treatment of 2-(4-(ethyl)benzylidene)-1H-indene-1,3(2H)-dione (50 mg, 0.19 mmol) with SGR (44 mg, 0.29 mmol) in the presence of NaOH (19.0 mg, 0.48 mmol) in MeOH (3 mL) at 25 °C for 1.5 h followed by column chromatography afforded the product **4g** as a yellow solid (75 mg, 96%).  $R_f$  (Acetone/Dichloromethane: 1/9) = 0.35. **Mp** 158-160 °C.  $^{13}\text{C}$  NMR (100 MHz, ppm/ $\text{CDCl}_3$ ): 170.3 (C), 148.1 (C), 144.2 (C), 134.0 (CH), 130.0 (CH), 130.0 (CH), 129.3 (CH), 128.7 (C), 128.5 (C), 127.7 (CH), 127.7 (CH), 127.0 (C), 126.4 (C), 125.4 (CH), 123.1 (CH), 75.9 (CH), 53.4 (CH<sub>3</sub>), 53.4 (CH<sub>3</sub>), 28.7 (CH<sub>2</sub>), 15.6 (CH<sub>3</sub>).  $^1\text{H}$  NMR (400 MHz, ppm/ $\text{CDCl}_3$ ): 12.85 (s, 1H), 7.73 (d,  $J = 7.6$  Hz, 1H), 7.56 (t,  $J = 7.4$  Hz, 1H), 7.43 (t,  $J = 7.6$  Hz, 1H), 7.27 (t,  $J = 8.4$  Hz, 1H), 7.17 (d,  $J = 8.0$  Hz, 2H), 7.11 (d,  $J = 8.0$  Hz, 2H), 6.49 (s, 1H), 3.64 (d,  $J = 11.6$  Hz, 3H), 3.55 (d,  $J = 11.6$  Hz, 3H), 2.61 (q,  $J = 7.6$  Hz, 2H), 1.22 (t,  $J = 7.4$  Hz, 3H).  $^{31}\text{P}$  NMR (161.9 MHz,  $\text{CDCl}_3$ ): 9.04. HRMS for  $\text{C}_{21}\text{H}_{22}\text{N}_2\text{O}_5^+$ : calcd.  $[\text{M}+\text{H}]^+$ : 413.1261, found: 413.1269.

**Dimethyl (3-(3-oxo-1,3-dihydroisobenzofuran-1-yl)-4-(p-tolyl)-1H-pyrazol-5-yl)phosphonate (4h)**

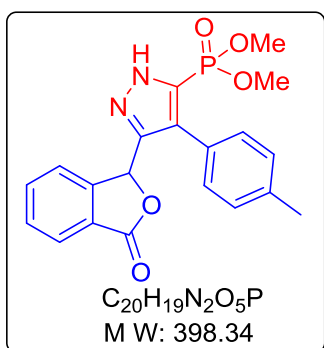

Following the general procedure, treatment of 2-(4-(methyl)benzylidene)-1H-indene-1,3(2H)-dione (50 mg, 0.20 mmol) with SGR (45 mg, 0.30 mmol) in the presence of NaOH (20.0 mg, 0.50 mmol) in MeOH (3 mL) at 25 °C for 1.5 h followed by column chromatography afforded the product **4h** as a yellow solid (68 mg, 86%).  $R_f$  (Acetone/Dichloromethane: 2/8) = 0.38. **Mp** 184-186 °C.  $^{13}\text{C}$  NMR (100 MHz, ppm/ $\text{CDCl}_3$ ): 170.3 (C), 148.1 (C), 138.0 (C), 134.1 (CH), 129.9 (CH), 129.9 (CH), 129.3 (C), 129.0 (CH), 129.0 (CH), 128.7 (d,  $J_{\text{C-P}} = 18.0$  Hz, C), 126.8 (C), 126.4 (C), 125.5 (CH), 123.2 (CH), 76.0 (CH), 53.4 (CH<sub>3</sub>), 53.4 (CH<sub>3</sub>), 21.4 (CH<sub>3</sub>).  $^1\text{H}$  NMR

(400 MHz, ppm/ $\text{CDCl}_3$ ): 7.76 (d,  $J = 7.2$  Hz, 1H), 7.59 (t,  $J = 7.4$  Hz, 1H), 7.46 (t,  $J = 7.4$  Hz, 1H), 7.29 (d,  $J = 7.6$  Hz, 1H), 7.18 (d,  $J = 8.0$  Hz, 2H), 7.11 (d,  $J = 7.6$  Hz, 2H), 6.47 (s, 1H), 3.66 (d,  $J = 11.6$  Hz, 3H), 3.56 (d,  $J = 11.6$  Hz, 3H), 2.34 (s, 3H).  $^{31}\text{P}$  NMR (161.9 MHz,  $\text{CDCl}_3$ ): 8.82. HRMS for  $\text{C}_{20}\text{H}_{20}\text{N}_2\text{O}_5\text{P}^+$ : calcd.  $[\text{M}+\text{H}]^+$ : 399.1104, found: 399.1104.

**Dimethyl (4-([1,1'-biphenyl]-4-yl)-3-(3-oxo-1,3-dihydroisobenzofuran-1-yl)-1H-pyrazol-5-yl)phosphonate (4i)**

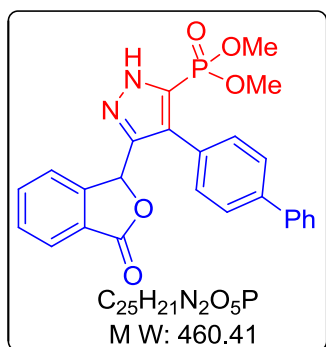

Following the general procedure, treatment of 2-([1,1'-biphenyl]-4-ylmethylene)-1H-indene-1,3(2H)-dione (50 mg, 0.16 mmol) with SGR (36.0 mg, 0.24 mmol) in the presence of NaOH (16.0 mg, 0.40 mmol) in MeOH (3 mL) at 25 °C for 1.5 h followed by column chromatography afforded the product **4i** as a yellow solid (70 mg, 95%).  $R_f$  (Acetone/Dichloromethane: 2/8 = 0.38).

**Mp** 138-140 °C.  $^{13}\text{C}$  NMR (100 MHz, ppm/ $\text{CDCl}_3$ ): 170.3 (C), 148.0 (C), 146.2 (C), 140.8 (C), 140.5 (C), 134.1 (CH), 130.4 (CH), 130.4 (CH), 129.3 (CH), 128.9 (CH), 128.9 (CH), 128.9 (C), 128.2 (C), 128.0 (C), 127.6 (CH), 127.1 (CH), 127.1 (CH), 126.9 (CH), 126.9 (CH), 126.4 (C), 125.4 (CH), 123.2 (CH), 76.0 (CH), 53.5 (CH<sub>3</sub>), 53.5 (CH<sub>3</sub>).  $^1\text{H}$  NMR (400 MHz, ppm/ $\text{CDCl}_3$ ): 12.84 (s, 1H), 7.74 (d,  $J = 7.6$  Hz, 1H), 7.58 (t,  $J = 7.8$  Hz, 3H), 7.53 (d,  $J = 8.0$  Hz, 2H), 7.46 (t,  $J = 7.4$  Hz, 3H), 7.38-7.30 (m, 4H), 6.54 (s, 1H), 3.69 (d,  $J = 11.6$  Hz, 3H), 3.61 (d,  $J = 11.6$  Hz, 3H).  $^{31}\text{P}$  NMR (161.9 MHz,  $\text{CDCl}_3$ ): 8.76. HRMS for  $\text{C}_{25}\text{H}_{22}\text{N}_2\text{O}_5\text{P}^+$ : calcd.  $[\text{M}+\text{H}]^+$ : 461.1261, found: 461.1214.

**Dimethyl (4-(4-bromophenyl)-3-(3-oxo-1,3-dihydroisobenzofuran-1-yl)-1H-pyrazol-5-yl)phosphonate (4j)**

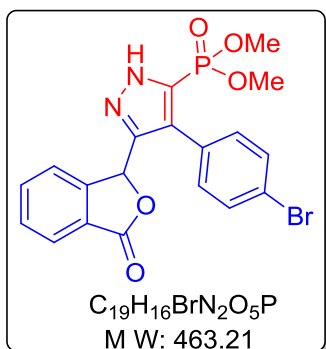

Following the general procedure, treatment of 2-(4-bromobenzylidene)-1H-indene-1,3(2H)-dione (50 mg, 0.16 mmol) with SGR (36 mg, 0.24 mmol) in the presence of NaOH (16.0 mg, 0.40 mmol) in MeOH (3 mL) at 25 °C for 1.5 h followed by column chromatography afforded the product **4j** as a yellow solid (55 mg, 74%).  $R_f$  (Acetone/Dichloromethane: 2/8) = 0.45.

**Mp** 158-160 °C.  $^{13}\text{C}$  NMR (100 MHz, ppm/ $\text{CDCl}_3$ ): 170.2 (C), 147.8 (C), 134.2 (CH), 131.6 (CH), 131.6 (CH), 131.5 (CH), 131.5 (CH), 129.5 (CH), 128.8 (C), 127.2 (C), 127.1 (C), 126.3 (C),

125.5 (CH), 123.2 (CH), 122.6 (C), 75.8 (CH), 53.5 (CH<sub>3</sub>), 53.5 (CH<sub>3</sub>). <sup>1</sup>H NMR (400 MHz, ppm/CDCl<sub>3</sub>): 13.04 (s, 1H), 7.75 (d, *J* = 7.6 Hz, 1H), 7.58 (t, *J* = 7.4 Hz, 1H), 7.47 (t, *J* = 7.6 Hz, 1H), 7.40 (d, *J* = 8.4 Hz, 2H), 7.28 (d, *J* = 7.6 Hz, 1H), 7.10 (d, *J* = 8.4 Hz, 2H), 6.47 (s, 1H), 3.66 (d, *J* = 11.6 Hz, 3H), 3.58 (d, *J* = 11.6 Hz, 3H). <sup>31</sup>P NMR (161.9 MHz, CDCl<sub>3</sub>): 8.26. HRMS for C<sub>19</sub>H<sub>17</sub>BrN<sub>2</sub>O<sub>5</sub>P<sup>+</sup>: calcd. [M+H]<sup>+</sup>: 463.0053, found: 463.0053.

**Dimethyl (4-(4-chlorophenyl)-3-(3-oxo-1,3-dihydroisobenzofuran-1-yl)-1H-pyrazol-5-yl)phosphonate (4k)**

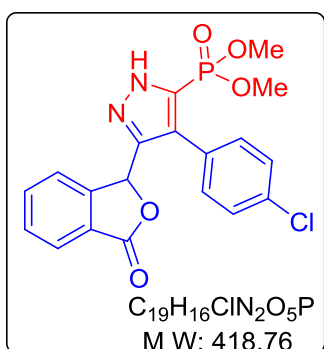

Following the general procedure, treatment of 2-(4-chlorobenzylidene)-1H-indene-1,3(2H)-dione (50 mg, 0.19 mmol) with SGR (42 mg, 0.28 mmol) in the presence of NaOH (19.0 mg, 0.48 mmol) in MeOH (3 mL) at 25 °C for 1.5 h followed by column chromatography afforded the product **4k** as a yellow solid (48 mg, 60%). *R<sub>f</sub>* (Acetone/Dichloromethane: 1/9) = 0.40. **Mp** 208-

210 °C. <sup>13</sup>C NMR (100 MHz, ppm/CDCl<sub>3</sub>): 170.1 (C), 147.8 (C), 134.5 (C), 134.2 (CH), 131.3 (CH), 131.3 (CH), 129.6 (CH), 128.6 (CH), 128.6 (CH), 128.3 (C), 127.3 (C), 127.1 (C), 126.3 (C), 125.6 (CH), 123.2 (CH), 75.9 (CH), 53.5 (CH<sub>3</sub>), 53.5 (CH<sub>3</sub>). <sup>1</sup>H NMR (400 MHz, ppm/CDCl<sub>3</sub>): 7.78 (d, *J* = 7.6 Hz, 1H), 7.60 (t, *J* = 7.4 Hz, 1H), 7.49 (t, *J* = 7.6 Hz, 1H), 7.31 (d, *J* = 7.6 Hz, 1H), 7.28 (d, *J* = 4.8 Hz, 2H), 7.19 (d, *J* = 8.8 Hz, 2H), 6.49 (s, 1H), 3.68 (d, *J* = 11.6 Hz, 3H), 3.59 (d, *J* = 11.6 Hz, 3H). <sup>31</sup>P NMR (161.9 MHz, CDCl<sub>3</sub>): 8.20. HRMS for C<sub>19</sub>H<sub>17</sub>ClN<sub>2</sub>O<sub>5</sub>P<sup>+</sup>: calcd. [M+H]<sup>+</sup>: 419.0558, found: 419.0507.

**Dimethyl (4-(4-fluorophenyl)-3-(3-oxo-1,3-dihydroisobenzofuran-1-yl)-1H-pyrazol-5-yl)phosphonate (4l)**

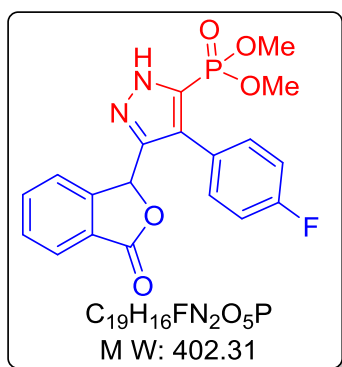

Following the general procedure, treatment of 2-(4-fluorobenzylidene)-1H-indene-1,3(2H)-dione (50 mg, 0.20 mmol) with SGR (45 mg, 0.30 mmol) in the presence of NaOH (20.0 mg, 0.50 mmol) in MeOH (3 mL) at 25 °C for 1.5 h followed by column chromatography afforded the product **4l** as a yellow solid (50 mg, 62%). *R<sub>f</sub>* (Acetone/Dichloromethane: 2/8) = 0.27.

**Mp** 168-170 °C. <sup>13</sup>C NMR (100 MHz, ppm/CDCl<sub>3</sub>): 170.1 (C), 162.7 (d, *J<sub>C-F</sub>* = 246.6 Hz, C), 147.8 (C), 146.1 (C), 134.2 (CH), 131.8 (d, *J<sub>C-F</sub>* = 8.1 Hz, CH), 131.7

(d,  $J_{C-F} = 8.1$  Hz, CH), 129.5 (CH), 127.4 (C), 127.2 (C), 126.3 (C), 125.7 (C), 125.5 (CH), 123.1 (CH), 115.4 (d,  $J_{C-F} = 21.5$  Hz CH), 115.3 (d,  $J_{C-F} = 21.5$  Hz, CH), 76.0 (CH), 53.4 (CH<sub>3</sub>), 53.4 (CH<sub>3</sub>). **<sup>1</sup>H NMR** (400 MHz, ppm/CDCl<sub>3</sub>): 13.04 (s, 1H), 7.75 (d,  $J = 7.6$  Hz, 1H), 7.58 (t,  $J = 7.4$  Hz, 1H), 7.47 (t,  $J = 7.6$  Hz, 1H), 7.40 (d,  $J = 8.4$  Hz, 2H), 7.28 (d,  $J = 7.6$  Hz, 1H), 7.10 (d,  $J = 8.0$  Hz, 2H), 6.47 (s, 1H), 3.66 (d,  $J = 11.6$  Hz, 3H), 3.58 (d,  $J = 11.6$  Hz, 3H). **<sup>31</sup>P NMR** (161.9 MHz, CDCl<sub>3</sub>): 8.34. **HRMS** for C<sub>19</sub>H<sub>17</sub>FN<sub>2</sub>O<sub>5</sub>P<sup>+</sup>: calcd. [M+H]<sup>+</sup>: 403.0854, found: 403.0853.

**Dimethyl (4-(3-methoxyphenyl)-3-(3-oxo-1,3-dihydroisobenzofuran-1-yl)-1H-pyrazol-5-yl)phosphonate (4m)**

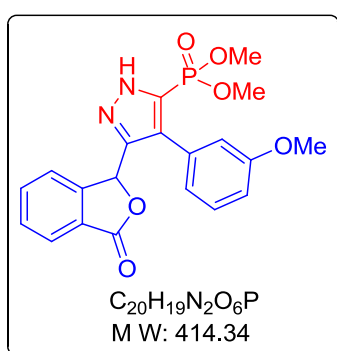

Following the general procedure, treatment of 2-(3-methoxybenzylidene)-1H-indene-1,3(2H)-dione (50 mg, 0.19 mmol) with SGR (44.0 mg, 0.29 mmol) in the presence of NaOH (19.0 mg, 0.48 mmol) in MeOH (3 mL) at 25 °C for 1.5 h followed by column chromatography afforded the product **4m** as a yellow solid (61 mg, 78%).  $R_f$ (Acetone/Dichloromethane: 2/8) =

0.46. **Mp** 162-164 °C. **<sup>13</sup>C NMR** (100 MHz, ppm/CDCl<sub>3</sub>): 170.3 (C), 159.2 (C), 148.0 (C), 134.0 (CH), 131.0 (CH), 129.3 (C), 129.3 (CH), 128.3 (C), 128.3 (C), 126.3 (C), 125.4 (CH), 123.1 (CH), 122.4 (C), 115.2 (CH), 114.2 (CH), 76.0 (CH), 55.3 (CH<sub>3</sub>), 53.3 (CH<sub>3</sub>), 53.3 (CH<sub>3</sub>). **<sup>1</sup>H NMR** (400 MHz, ppm/CDCl<sub>3</sub>): 12.78 (s, 1H), 7.75 (d,  $J = 8.0$  Hz, 1H), 7.58 (d,  $J = 7.4$  Hz, 1H), 7.45 (t,  $J = 7.6$  Hz, 1H), 7.29 (d,  $J = 7.6$  Hz, 1H), 7.19 (d,  $J = 8.0$  Hz, 1H), 6.85-6.80 (m, 3H), 6.52 (s, 1H), 3.77 (s, 3H), 3.66 (d,  $J = 11.6$  Hz, 3H), 3.58 (d,  $J = 11.6$  Hz, 3H). **<sup>31</sup>P NMR** (161.9 MHz, CDCl<sub>3</sub>): 8.67. **HRMS** for C<sub>20</sub>H<sub>20</sub>N<sub>2</sub>O<sub>6</sub>P<sup>+</sup>: calcd. [M+H]<sup>+</sup>: 415.1053, found: 415.1049.

**Dimethyl (4-(3-chlorophenyl)-3-(3-oxo-1,3-dihydroisobenzofuran-1-yl)-1H-pyrazol-5-yl)phosphonate (4n)**

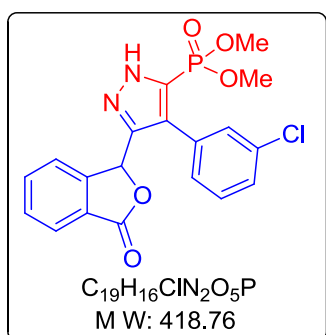

Following the general procedure, treatment of 2-(3-chlorobenzylidene)-1H-indene-1,3(2H)-dione (50 mg, 0.19 mmol) with SGR (42 mg, 0.28 mmol) in the presence of NaOH (19.0 mg, 0.48 mmol) in MeOH (3 mL) at 25 °C for 1.5 h followed by column chromatography afforded the product **4n** as a yellow solid (55 mg, 69%).  $R_f$ (Acetone/Dichloromethane: 1/9) = 0.35. **Mp** 134-

136 °C. **<sup>13</sup>C NMR** (100 MHz, ppm/CDCl<sub>3</sub>): 170.1 (C), 147.8 (C), 146.0 (C), 134.2 (CH), 133.9 (C),

131.8 (C), 129.9 (CH), 129.5 (CH), 129.5 (CH), 128.2 (CH), 126.7 (C), 126.5 (C), 126.2 (C), 125.4 (CH), 123.0 (CH), 76.0 (CH), 53.5 (d,  $J_{C-P}$  = 2.8 Hz, CH<sub>3</sub>), 53.4 (d,  $J_{C-P}$  = 2.9 Hz, CH<sub>3</sub>). **<sup>1</sup>H NMR** (400 MHz, ppm/CDCl<sub>3</sub>): 7.72 (d,  $J$  = 7.6 Hz, 1H), 7.59 (t,  $J$  = 7.4 Hz, 1H), 7.46 (t,  $J$  = 7.4 Hz, 1H), 7.29 (d,  $J$  = 7.6 Hz, 1H), 7.22 (d,  $J$  = 7.6 Hz, 2H), 7.12 (d,  $J$  = 6.8 Hz, 1H), 7.04 (s, 1H), 6.51 (s, 1H), 3.67 (d,  $J$  = 11.6 Hz, 3H), 3.59 (d,  $J$  = 11.6 Hz, 3H). **<sup>31</sup>P NMR** (161.9 MHz, CDCl<sub>3</sub>): 7.74. **HRMS** for C<sub>19</sub>H<sub>17</sub>ClN<sub>2</sub>O<sub>5</sub>P<sup>+</sup>: calcd. [M+H]<sup>+</sup>: 419.0558, found: 419.0551.

**Dimethyl (4-(3-bromophenyl)-3-(3-oxo-1,3-dihydroisobenzofuran-1-yl)-1H-pyrazol-5-yl)phosphonate (4o)**

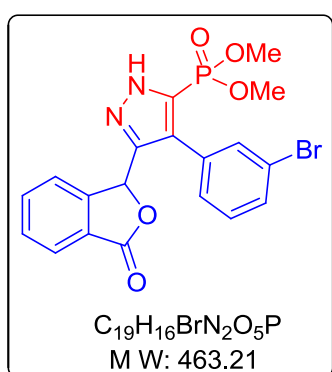

Following the general procedure, treatment of 2-(3-bromobenzylidene)-1H-indene-1,3(2H)-dione (50 mg, 0.16 mmol) with SGR (36 mg, 0.24 mmol) in the presence of NaOH (16.0 mg, 0.40 mmol) in MeOH (3 mL) at 25 °C for 1.5 h followed by column chromatography afforded the product **4o** as a yellow solid (51 mg, 69%). **R<sub>f</sub>** (Acetone/Dichloromethane: 2/8) = 0.38.

**Mp** 160-162 °C. **<sup>13</sup>C NMR** (100 MHz, ppm/CDCl<sub>3</sub>): 170.1 (C), 147.8 (C), 146.2 (C), 134.2 (CH), 132.8 (CH), 132.0 (CH), 131.2 (C), 129.7 (CH), 129.6 (CH), 128.7 (CH), 126.6 (C), 126.4 (C), 126.2 (C), 125.5 (CH), 123.0 (CH), 122.0 (C), 76.1 (CH), 53.5 (d,  $J_{C-P}$  = 2.4 Hz, CH<sub>3</sub>), 53.5 (d,  $J_{C-P}$  = 2.7 Hz, CH<sub>3</sub>). **<sup>1</sup>H NMR** (400 MHz, ppm/CDCl<sub>3</sub>): 7.73 (d,  $J$  = 7.6 Hz, 1H), 7.60 (t,  $J$  = 7.2 Hz, 1H), 7.46 (t,  $J$  = 7.4 Hz, 1H), 7.40-7.37 (m, 1H), 7.29 (d,  $J$  = 7.6 Hz, 1H), 7.18-7.13 (m, 3H), 6.51 (s, 1H), 3.67 (d,  $J$  = 11.6 Hz, 3H), 3.59 (d,  $J$  = 11.6 Hz, 3H). **<sup>31</sup>P NMR** (161.9 MHz, CDCl<sub>3</sub>): 8.88. **HRMS** for C<sub>19</sub>H<sub>17</sub>BrN<sub>2</sub>O<sub>5</sub>P<sup>+</sup>: calcd. [M+H]<sup>+</sup>: 463.0053, found: 463.0053.



**Dimethyl (4-(2-methoxyphenyl)-3-(3-oxo-1,3-dihydroisobenzofuran-1-yl)-1H-pyrazol-5-yl)phosphonate (4p)**

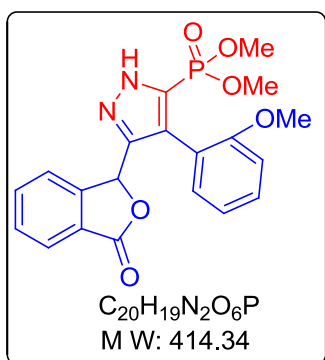

Following the general procedure, treatment of 2-(2-methoxybenzylidene)-1H-indene-1,3(2H)-dione (50 mg, 0.19 mmol) with SGR (44.0 mg, 0.29 mmol) in the presence of NaOH (16.0 mg, 0.48 mmol) in MeOH (3 mL) at 25 °C for 1.5 h followed by column chromatography afforded the product **4p** as a white solid (59 mg, 75%).  $R_f$  (Acetone/Dichloromethane: 2/8) = 0.46.

**Mp** 170-172 °C.  $^{13}C$  NMR (100 MHz, ppm/ $CDCl_3$ ): 170.3 (C), 156.8 (C), 148.0 (C), 133.6 (CH), 132.1 (CH), 130.0 (CH), 129.1 (CH), 126.1 (C), 125.0 (CH), 123.2 (CH), 120.2 (CH), 118.7 (CH), 110.2 (C), 75.9 (CH), 55.1 (CH<sub>3</sub>), 53.4 (CH<sub>3</sub>), 53.3 (CH<sub>3</sub>).  $^1H$  NMR (400 MHz, ppm/ $CDCl_3$ ): 12.77 (s, 1H), 7.69 (s, 1H), 7.55 (t,  $J$  = 7.0 Hz, 1H), 7.42 (t,  $J$  = 7.4 Hz, 1H), 7.33 (d,  $J$  = 7.6 Hz, 1H), 7.29-7.22 (m, 2H), 6.86 (s, 1H), 6.52 (s, 1H), 3.64 (s, 3H), 3.59 (d,  $J$  = 11.6 Hz, 6H).  $^{31}P$  NMR (161.9 MHz,  $CDCl_3$ ): 8.53. HRMS for  $C_{20}H_{20}N_2O_6P^+$ : calcd.  $[M+H]^+$ : 415.1053, found: 415.1030.

**Dimethyl (4-(3,4-dimethoxyphenyl)-3-(3-oxo-1,3-dihydroisobenzofuran-1-yl)-1H-pyrazol-5-yl)phosphonate (4q)**

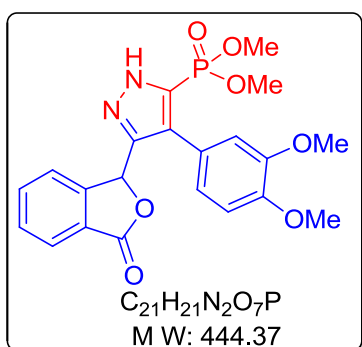

Following the general procedure, treatment of 2-(3,4-dimethoxybenzylidene)-1H-indene-1,3(2H)-dione (50 mg, 0.17 mmol) with SGR (39 mg, 0.26 mmol) in the presence of NaOH (17.0 mg, 0.43 mmol) in MeOH (3 mL) at 25 °C for 1.5 h followed by column chromatography afforded the product **4q** as a yellow solid (50 mg, 67%).  $R_f$  (Acetone/Dichloromethane:

2/8) = 0.31. **Mp** 182-184 °C.  $^{13}C$  NMR (100 MHz, ppm/ $CDCl_3$ ): 170.3 (C), 148.9 (C), 148.5 (C), 147.9 (C), 145.7 (C), 134.0 (CH), 129.3 (C), 128.5 (C), 128.2 (C), 126.4 (CH), 125.4 (CH), 123.1 (CH), 122.5 (CH), 122.2 (C), 113.1 (CH), 110.8 (CH), 76.0 (CH), 55.9 (CH<sub>3</sub>), 55.9 (CH<sub>3</sub>), 53.4 (CH<sub>3</sub>), 53.4 (CH<sub>3</sub>).  $^1H$  NMR (400 MHz, ppm/ $CDCl_3$ ): 12.91 (s, 1 H), 7.74 (d,  $J$  = 7.6 Hz, 1H), 7.56 (t,  $J$  = 7.4 Hz, 1H), 7.43 (t,  $J$  = 7.6 Hz, 1H), 7.28 (d,  $J$  = 7.6 Hz, 1H), 6.86-6.77 (m, 3H), 6.51 (s, 1H), 3.86 (s, 3H), 3.81 (s, 3H), 3.65 (d,  $J$  = 11.6 Hz, 3H), 3.57 (d,  $J$  = 11.6 Hz, 3H).  $^{31}P$  NMR

(161.9 MHz, CDCl<sub>3</sub>): 9.07. **HRMS** for C<sub>21</sub>H<sub>22</sub>N<sub>2</sub>O<sub>7</sub>P<sup>+</sup>: 445.1159, calcd. [M+H]<sup>+</sup>: found: 445.1155. **CCDC No.** 1547535.

**Dimethyl (4-(3,4,5-trimethoxyphenyl)-3-(3-oxo-1,3-dihydroisobenzofuran-1-yl)-1H-pyrazol-5-yl)phosphonate (4r)**

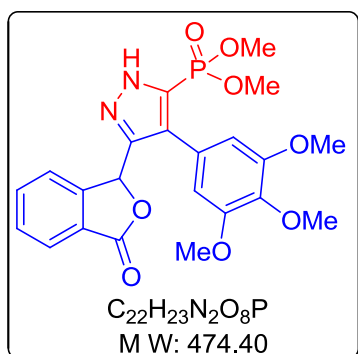

Following the general procedure, treatment of 2-(3,4,5-trimethoxybenzylidene)-1H-indene-1,3(2H)-dione (50 mg, 0.15 mmol) with SGR (35.0 mg, 0.23 mmol) in the presence of NaOH (15.0 mg, 0.38 mmol) in MeOH (3 mL) at 25 °C for 1.5 h followed by column chromatography afforded the product **4r** as a yellow solid (48 mg, 67%). **R<sub>f</sub>**(Acetone/Dichloromethane: 2/8) = 0.30. **Mp** 184-186 °C. **<sup>13</sup>C NMR** (100 MHz, ppm/CDCl<sub>3</sub>): 170.2 (C), 152.8 (C), 152.8 (C), 152.8 (C), 147.8 (C), 137.8 (C), 134.0 (CH), 129.4 (C), 128.5 (C), 128.4 (C), 126.5 (CH), 125.4 (CH), 125.2 (C), 123.2 (CH), 107.3 (CH), 107.3 (CH), 76.1 (CH), 61.0 (CH<sub>3</sub>), 56.2 (CH<sub>3</sub>), 56.2 (CH<sub>3</sub>), 53.5 (CH<sub>3</sub>), 53.5 (CH<sub>3</sub>). **<sup>1</sup>H NMR** (400 MHz, ppm/CDCl<sub>3</sub>): 12.13 (s, 1H), 7.77 (d, *J* = 8.0 Hz, 1H), 7.59 (t, *J* = 7.6 Hz, 1H), 7.47 (t, *J* = 7.4 Hz, 1H), 7.30 (d, *J* = 7.6 Hz, 1H), 6.56 (s, 1H), 6.51 (s, 2H), 3.84 (s, 3H), 3.81 (s, 6H) 3.68 (d, *J* = 11.6 Hz, 3H), 3.63 (d, *J* = 11.6 Hz, 3H). **<sup>31</sup>P NMR** (161.9 MHz, CDCl<sub>3</sub>): 9.07. **HRMS** for C<sub>22</sub>H<sub>24</sub>N<sub>2</sub>O<sub>8</sub>P<sup>+</sup>: calcd. [M+H]<sup>+</sup>: 475.1265, found: 475.1268.

**Dimethyl (3-(3-oxo-1,3-dihydroisobenzofuran-1-yl)-4-(thiophen-2-yl)-1H-pyrazol-5-yl)phosphonate (4s)**

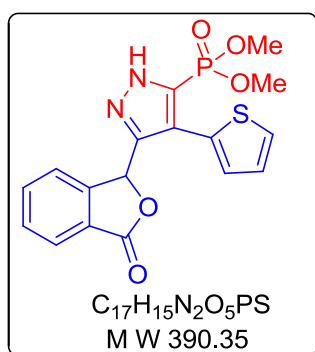

Following the general procedure, treatment of (2-(thiophen-2-ylmethylene)-1H-indene-1,3(2H)-dione (50 mg, 0.21 mmol) with SGR (48.0 mg, 0.32 mmol) in the presence of NaOH (21.0 mg, 0.53 mmol) in MeOH (3 mL) at 25 °C for 1.5 h followed by column chromatography afforded the product **4s** as a yellow solid (48 mg, 58%). **R<sub>f</sub>**(Acetone/Dichloromethane: 1/9) = 0.40. **Mp** 124-126 °C. **<sup>13</sup>C NMR** (100 MHz, ppm/CDCl<sub>3</sub>): 170.3 (C), 147.8 (C), 134.2 (CH), 129.5 (CH), 129.5 (CH), 129.4 (C), 127.3 (CH), 127.3 (CH), 126.3 (C), 125.5 (CH), 123.2 (CH), 120.7 (C), 120.5 (C), 75.8 (CH), 53.6 (CH<sub>3</sub>), 53.6 (CH<sub>3</sub>). **<sup>1</sup>H NMR** (400 MHz, ppm/CDCl<sub>3</sub>): 12.92 (s, 1H), 7.79 (d, *J* = 7.6 Hz, 1H), 7.61 (t, *J* = 7.4 Hz, 1H), 7.48 (t, *J* = 7.6 Hz, 1H), 7.33 (t, *J* = 7.0

Hz, 2H), 7.01 (s, 1H), 6.99 (d,  $J = 6.4$  Hz, 1H), 6.59 (s, 1H), 3.70 (d,  $J = 11.6$  Hz, 3H), 3.64 (d,  $J = 11.6$  Hz, 3H).  $^{31}\text{P}$  NMR (161.9 MHz,  $\text{CDCl}_3$ ): 7.76. HRMS for  $\text{C}_{17}\text{H}_{16}\text{N}_2\text{O}_5\text{PS}^+$ : calcd.  $[\text{M}+\text{H}]^+$ : 391.0512, found: 391.0502.

**Dimethyl (4-(furan-2-yl)-3-(3-oxo-1,3-dihydroisobenzofuran-1-yl)-1H-pyrazol-5-yl)phosphonate (4t)**

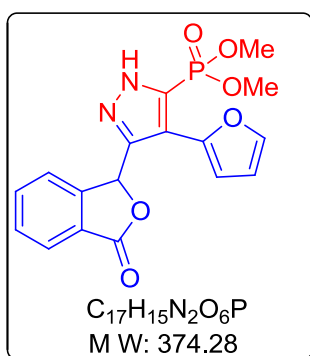

Following the general procedure, treatment of (2-(furan-2-ylmethylene)-1H-indene-1,3(2H)-dione (50 mg, 0.22 mmol) with SGR (50 mg, 0.33 mmol) in the presence of NaOH (22.0 mg, 0.55 mmol) in MeOH (3 mL) at 25 °C for 1.5 h followed by column chromatography afforded the product **4t** as a yellow solid (68 mg, 83%).  $R_f$  (Acetone/Dichloromethane: 2/8) = 0.38. **Mp** 178-180 °C.

$^{13}\text{C}$  NMR (100 MHz, ppm/ $\text{CDCl}_3$ ): 170.6 (C), 148.0 (C), 144.8 (C), 144.3 (C), 142.7 (CH), 134.2 (CH), 129.5 (CH), 126.2 (C), 125.5 (CH), 123.3 (CH), 117.5 (C), 117.3 (C), 111.7(CH), 110.2 (CH), 76.1 (CH), 53.6 ( $\text{CH}_3$ ), 53.6 ( $\text{CH}_3$ ).  $^1\text{H}$  NMR (400 MHz, ppm/ $\text{CDCl}_3$ ): 7.92 (d,  $J = 7.2$  Hz, 1H), 7.62 (d,  $J = 7.2$  Hz, 1H), 7.54 (d,  $J = 7.2$  Hz, 1H), 7.38 (t,  $J = 7.2$  Hz, 2H), 6.88 (s, 1H), 6.71 (s, 1H), 6.43 (s, 1H), 3.75 (t,  $J = 11.6$  Hz, 6H).  $^{31}\text{P}$  NMR (161.9 MHz,  $\text{CDCl}_3$ ): 8.58. HRMS for  $\text{C}_{17}\text{H}_{16}\text{N}_2\text{O}_6\text{P}^+$ : calcd.  $[\text{M}+\text{H}]^+$ : 375.0734, found: 375.0740.

**Dimethyl (3-(3-oxo-1,3-dihydroisobenzofuran-1-yl)-4-(1H-pyrrol-2-yl)-1H-pyrazol-5-yl)phosphonate (4u)**

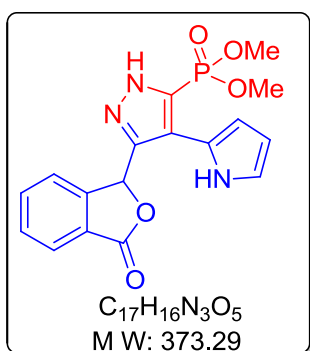

Following the general procedure, treatment of (2-(1H-pyrrol-2-yl)methylene)-1H-indene-1,3(2H)-dione (50 mg, 0.22 mmol) with SGR (50 mg, 0.33 mmol) in the presence of NaOH (22.0 mg, 0.55mmol) in MeOH (3 mL) at 25 °C for 1.5 h followed by column chromatography afforded the product **4u** as a yellow solid (73 mg, 89%).  $R_f$ (Acetone/Dichloromethane: 1/9) = 0.36. **Mp** 160-162 °C.

$^{13}\text{C}$  NMR (100 MHz, ppm/ $\text{CDCl}_3$ ): 170.2 (C), 147.3 (C), 134.5 (CH), 129.9 (CH), 126.3 (C), 125.9 (CH), 123.8 (CH), 121.8 (C), 120.4 (C), 120.0 (CH), 109.9 (CH), 109.7 (CH), 75.2 (CH), 53.8 (d,  $J_{\text{C-P}} = 5.4$  Hz,  $\text{CH}_3$ ), 53.8 (d,  $J_{\text{C-P}} = 5.4$  Hz,  $\text{CH}_3$ ).  $^1\text{H}$  NMR (400 MHz, ppm/ $\text{CDCl}_3$ ): 11.52 (s, 1H), 10.25 (s, 1H), 7.93 (d,  $J = 7.6$  Hz, 1H), 7.68 (t,  $J = 7.0$  Hz, 1H), 7.57 (t,  $J = 7.4$  Hz, 1H), 7.42 (d,  $J = 7.6$  Hz, 1H), 6.94 (s, 1H), 6.71 (s, 1H), 6.62 (s, 1H), 6.29 (d,  $J$

= 4.0 Hz, 1H), 3.76 (d,  $J$  = 11.2 Hz, 3H), 3.62 (d,  $J$  = 12.0 Hz, 3H).  $^{31}\text{P}$  NMR (161.9 MHz,  $\text{CDCl}_3$ ): 9.48. HRMS for  $\text{C}_{17}\text{H}_{17}\text{N}_3\text{O}_5\text{P}^+$ : calcd.  $[\text{M}+\text{H}]^+$ : 374.0900, found: 374.0896.

**(E)-Dimethyl (4-(ferrocene-2-yl)-3-(3-oxo-1,3-dihydroisobenzofuran-1-yl)-1H-pyrazol-5-yl)phosphonate (4v)**

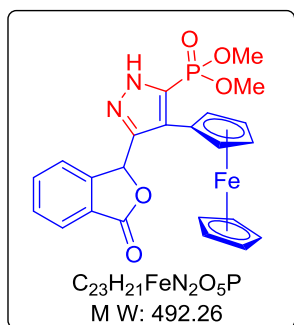

Following the general procedure, treatment of (E)-2-(ferrocenyl)-1H-indene-1,3(2H)-dione (50 mg, 0.15 mmol) with SGR (35 mg, 0.23 mmol) in the presence of NaOH (15.0 mg, 0.38 mmol) in MeOH (3 mL) at 25 °C for 1.5 h followed by column chromatography afforded the product **4v** as a yellow solid (37 mg, 50%).  $R_f$  (Acetone/Dichloromethane: 2/8) = 0.44. **Mp** 218-220°C.  $^{13}\text{C}$  NMR

(100 MHz, ppm/  $\text{DMSO}-d_6$ ): 170.0 (C), 148.9 (C), 145.7 (C), 134.2 (CH), 129.3 (CH), 127.7 (C), 125.8 (C), 125.6 (C), 125.3 (C), 124.7 (CH), 124.0 (CH), 75.4 (CH), 74.7 (C), 69.4 (CH), 69.4 (CH), 69.4 (CH), 69.4 (CH), 68.7 (CH), 68.4 (CH), 68.3 (C), 53.1 ( $\text{CH}_3$ ), 53.0 ( $\text{CH}_3$ ).  $^1\text{H}$  NMR (400 MHz, ppm/  $\text{CDCl}_3$ ): 11.59 (s, 1H), 7.97 (d,  $J$  = 7.6 Hz, 1H), 7.73 (t,  $J$  = 7.4 Hz, 1H), 7.61 (t,  $J$  = 7.4 Hz, 1H), 7.48 (d,  $J$  = 7.6 Hz, 1H), 7.35 (s, 1H), 4.92 (s, 1H), 4.83 (s, 1H), 4.39 (s, 2H), 4.15 (s, 5H), 3.77 (d,  $J$  = 11.6 Hz, 3H), 3.64 (d,  $J$  = 11.6 Hz, 3H).  $^{31}\text{P}$  NMR (161.9 MHz,  $\text{CDCl}_3$ ): 8.85. HRMS for  $\text{C}_{23}\text{H}_{22}\text{FeN}_2\text{O}_5\text{P}^+$ : calcd.  $[\text{M}+\text{Na}]^+$ : 492.0430, found: 515.0433.

**(E)-Dimethyl (4-(but-1-en-1-yl)-3-(3-oxo-1,3-dihydroisobenzofuran-1-yl)-1H-pyrazol-5-yl)phosphonate (4w)**

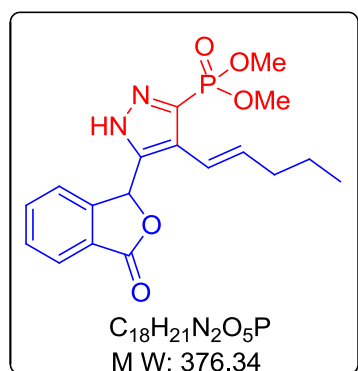

Following the general procedure, treatment of (E)-2-(hex-2-en-1-ylidene)-1H-indene-1,3(2H)-dione (50 mg, 0.22 mmol) with SGR (36 mg, 0.24 mmol) in the presence of NaOH (22.0 mg, 0.55 mmol) in MeOH (3 mL) at 25 °C for 1.5 h followed by column chromatography afforded the product **4w** as a yellow solid (41 mg, 50%).  $R_f$  (Acetone/Dichloromethane : 1/9) = 0.27.

**Mp** 178-180 °C.  $^{13}\text{C}$  NMR (100 MHz, ppm/ $\text{CDCl}_3$ ): 170.4 (C), 147.9 (C), 145.0 (C), 137.9 (CH), 134.3 (CH), 129.5 (CH), 127.2 (C), 126.5 (C), 125.8 (C), 125.6 (CH), 123.6 (CH), 117.0 (CH), 76.1 (CH), 53.4 ( $\text{CH}_3$ ), 53.4 ( $\text{CH}_3$ ), 35.6 ( $\text{CH}_2$ ), 22.3 ( $\text{CH}_2$ ), 15.5 ( $\text{CH}_3$ ).  $^1\text{H}$  NMR (400 MHz, ppm/ $\text{CDCl}_3$ ): 7.91 (d,  $J$  = 7.6 Hz, 1H), 7.65 (t,  $J$  = 7.4 Hz, 1H), 7.54 (t,  $J$  = 7.6 Hz, 1H), 7.39 (d,  $J$  = 7.6 Hz, 1H), 6.59 (s, 1H), 6.20-6.05 (m, 2H), 3.75 (d,  $J$  = 11.6 Hz,

3H), 3.72 (d,  $J = 12.0$  Hz, 3H), 2.08 (q,  $J = 7.2$  Hz, 2H), 1.39 (q,  $J = 7.2$  Hz, 2H), 0.88 (t,  $J = 7.4$  Hz, 3H).  **$^{31}\text{P}$  NMR** (161.9 MHz,  $\text{CDCl}_3$ ): 8.85. **HRMS** for  $\text{C}_{18}\text{H}_{22}\text{N}_2\text{O}_5\text{P}^+$ : calcd.  $[\text{M}+\text{H}]^+$ : 377.1261, found: 377.1256.

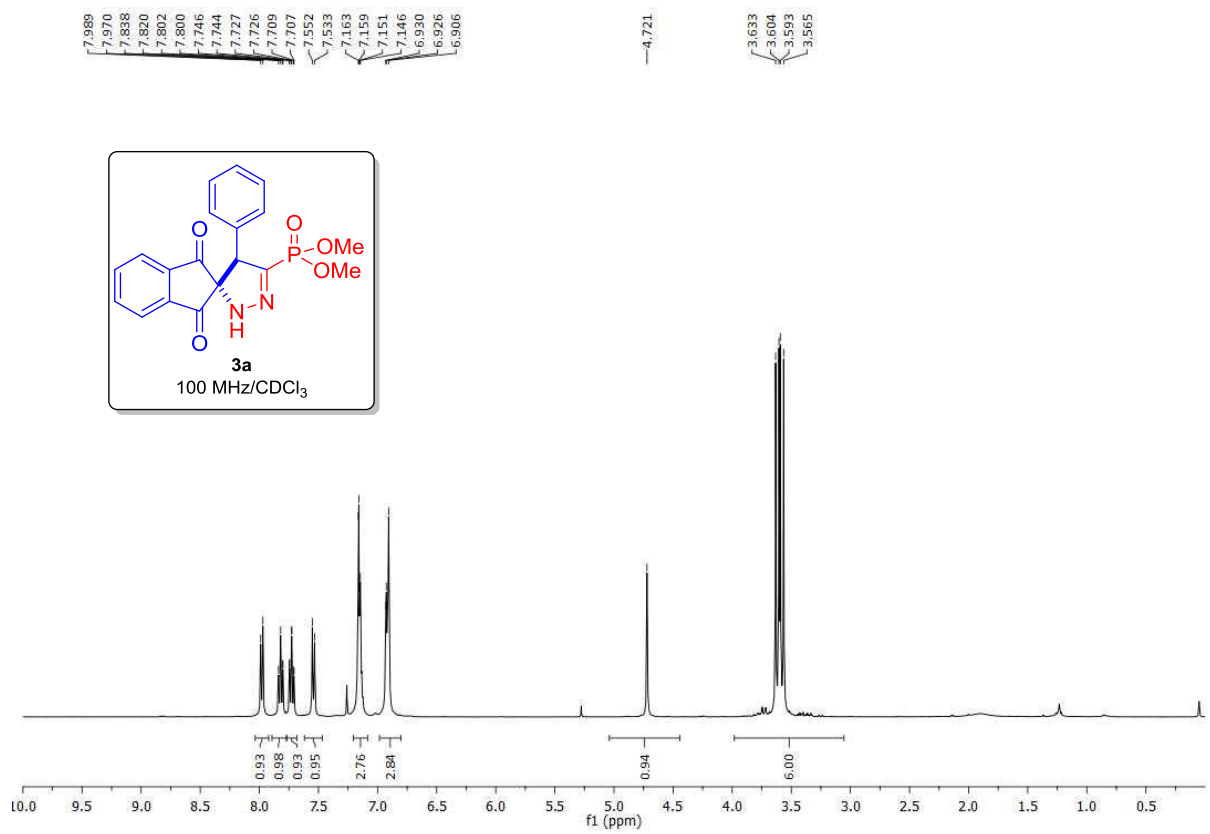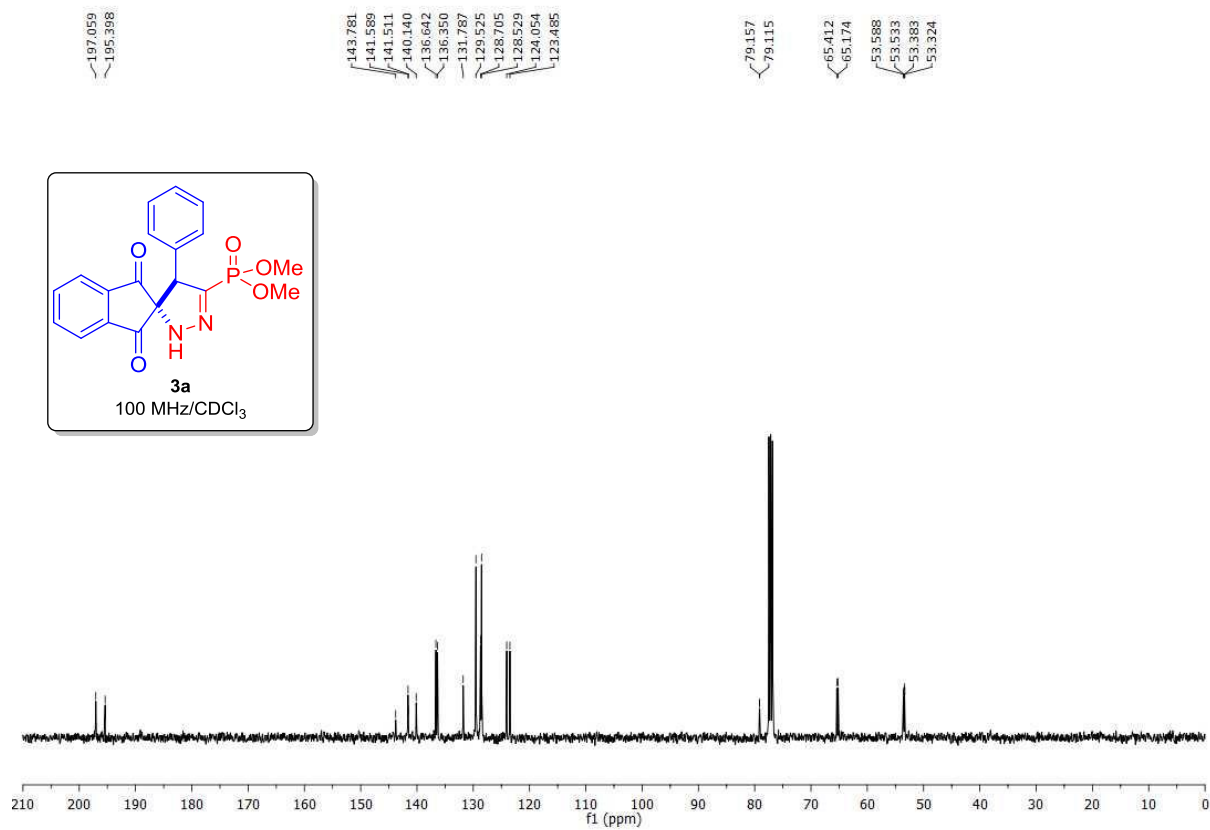

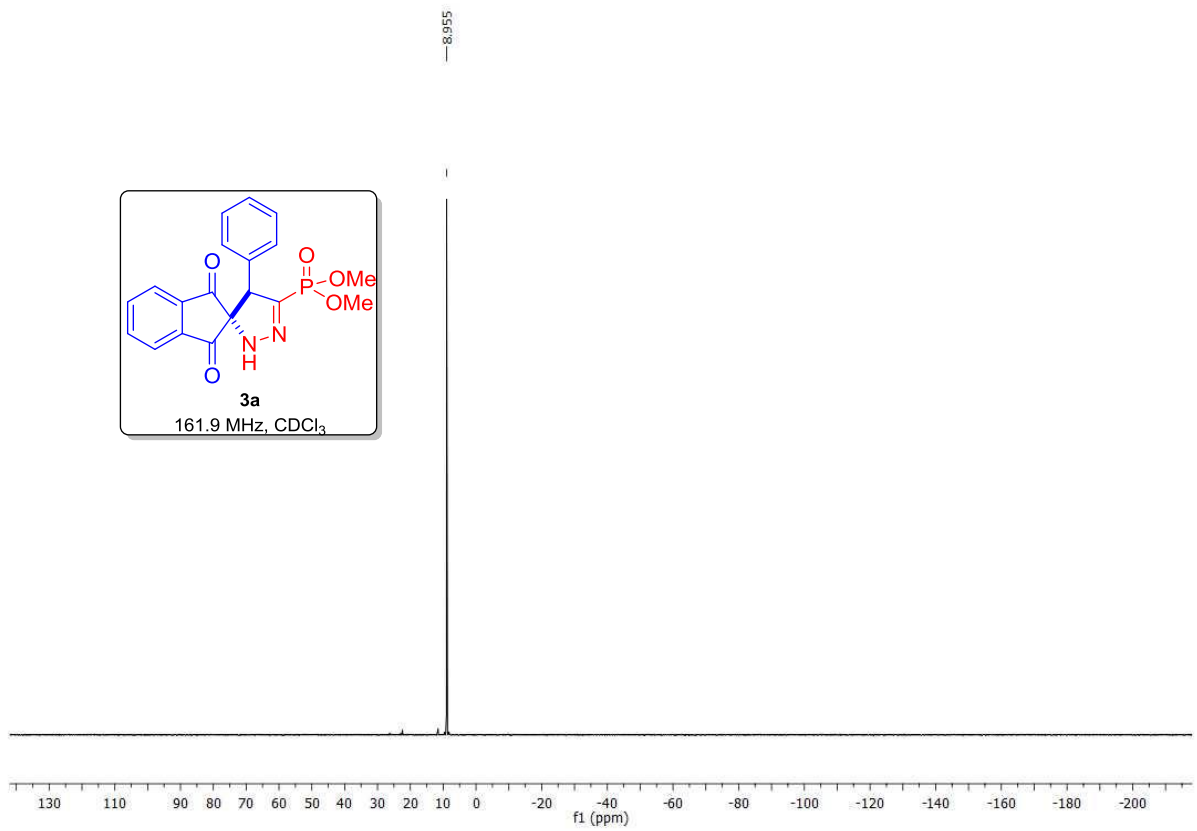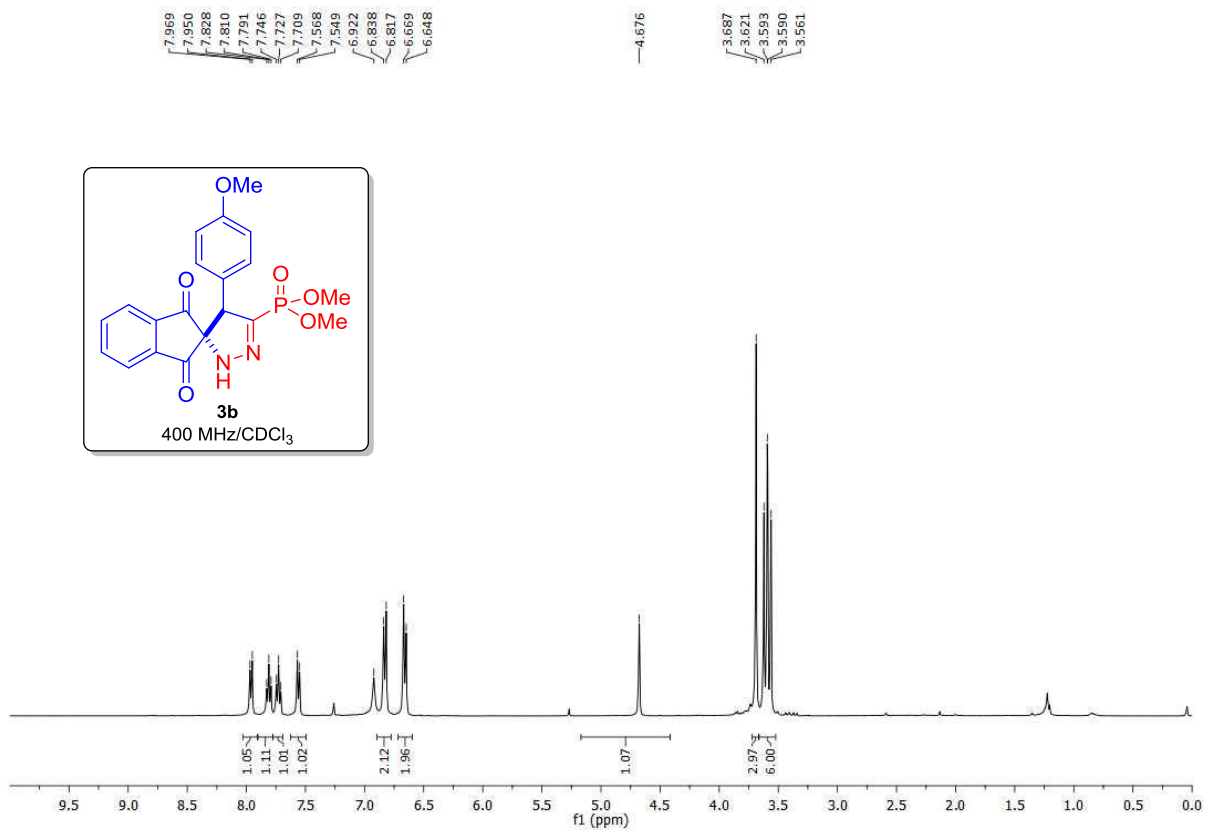

197.201  
195.459

159.605

143.277  
141.547  
141.459  
140.096  
136.507  
136.209  
130.691  
123.928  
123.692  
123.386

113.805

79.031  
78.995  
77.414  
77.160  
76.905  
64.701  
64.510  
55.118  
53.466  
53.421  
53.316  
53.267

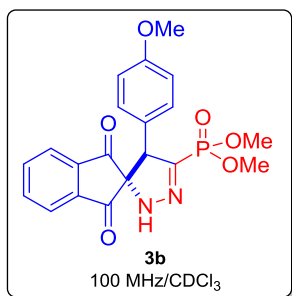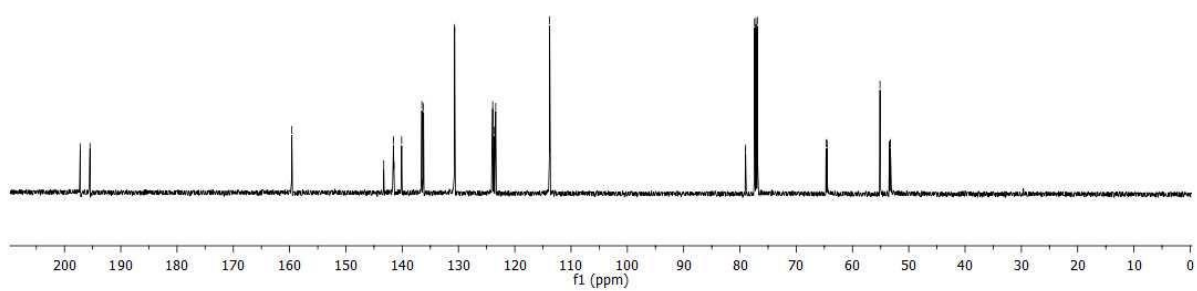

9.139

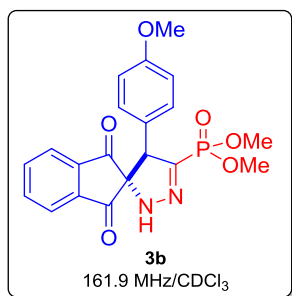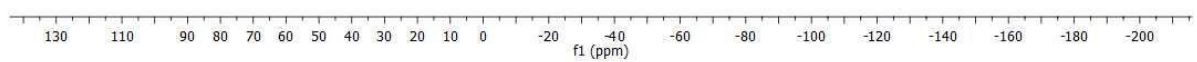



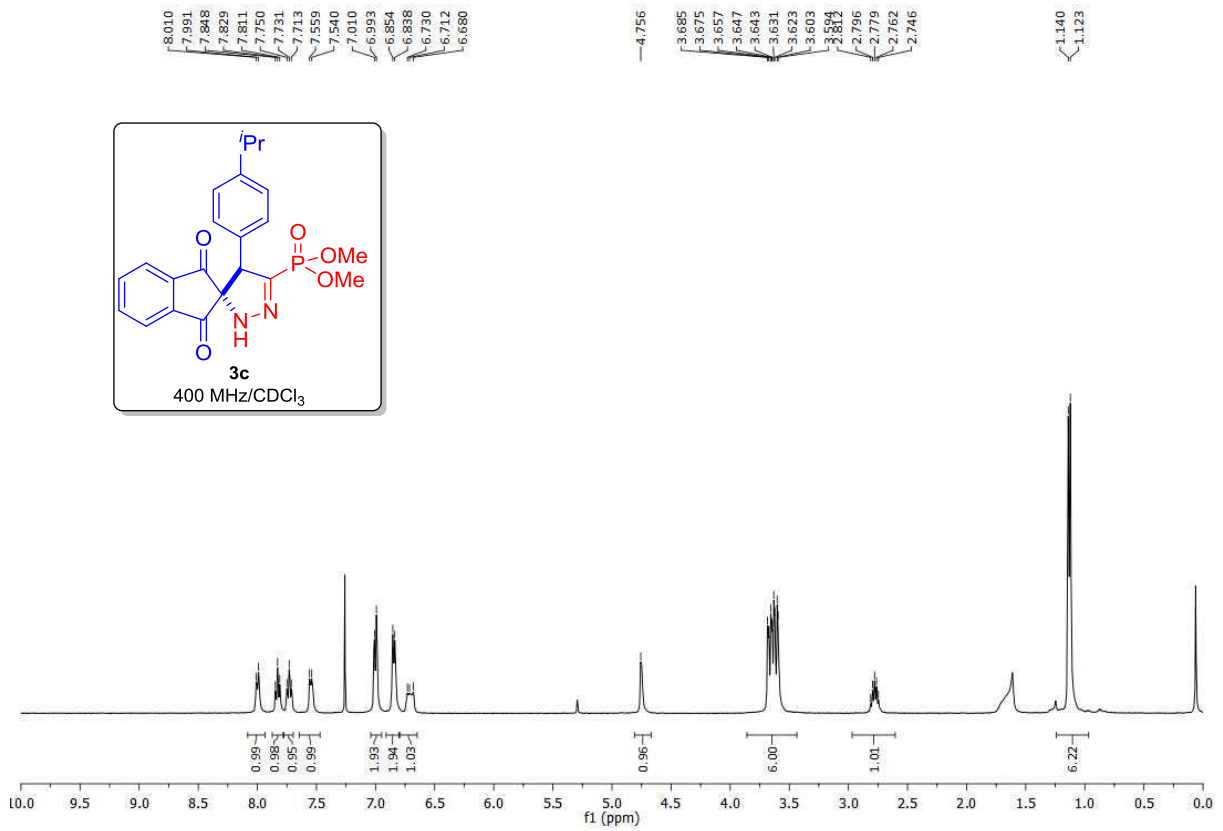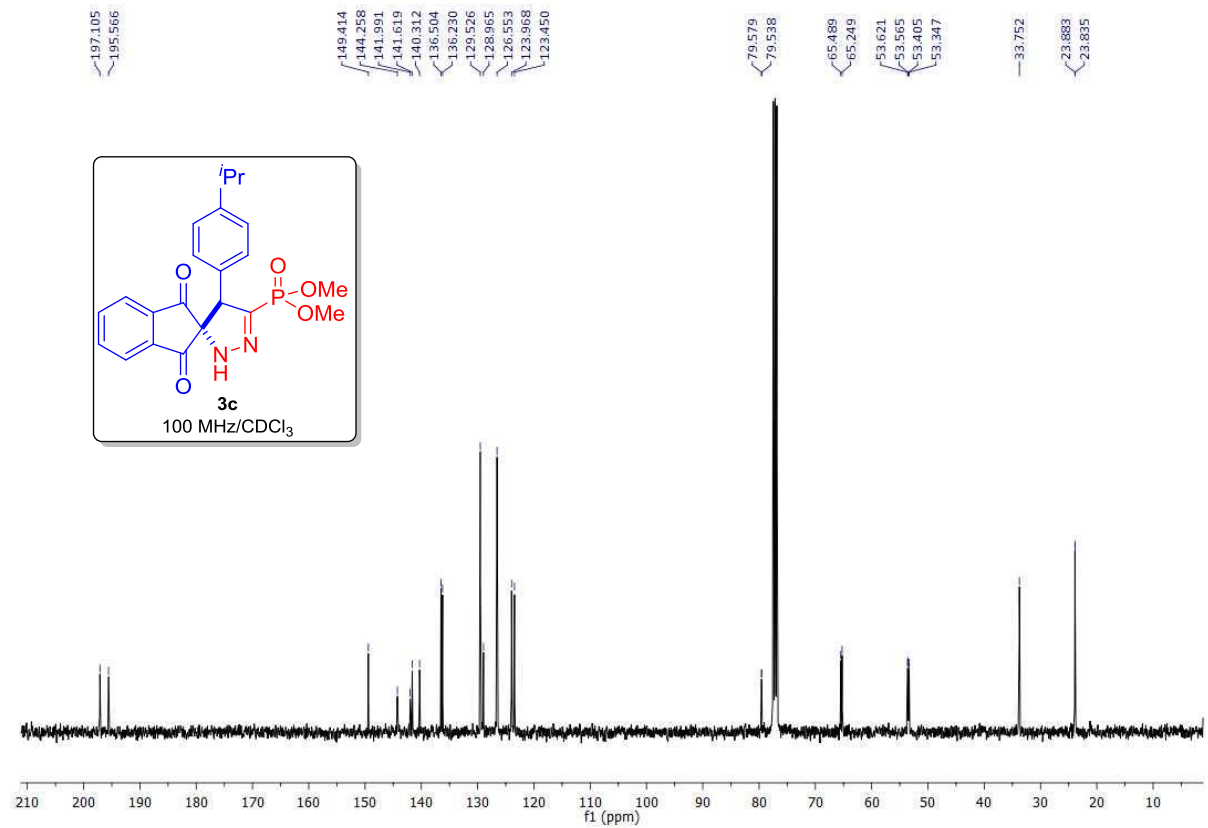

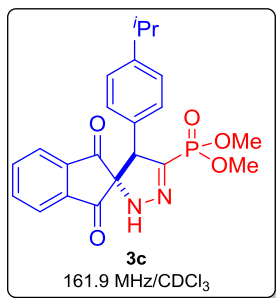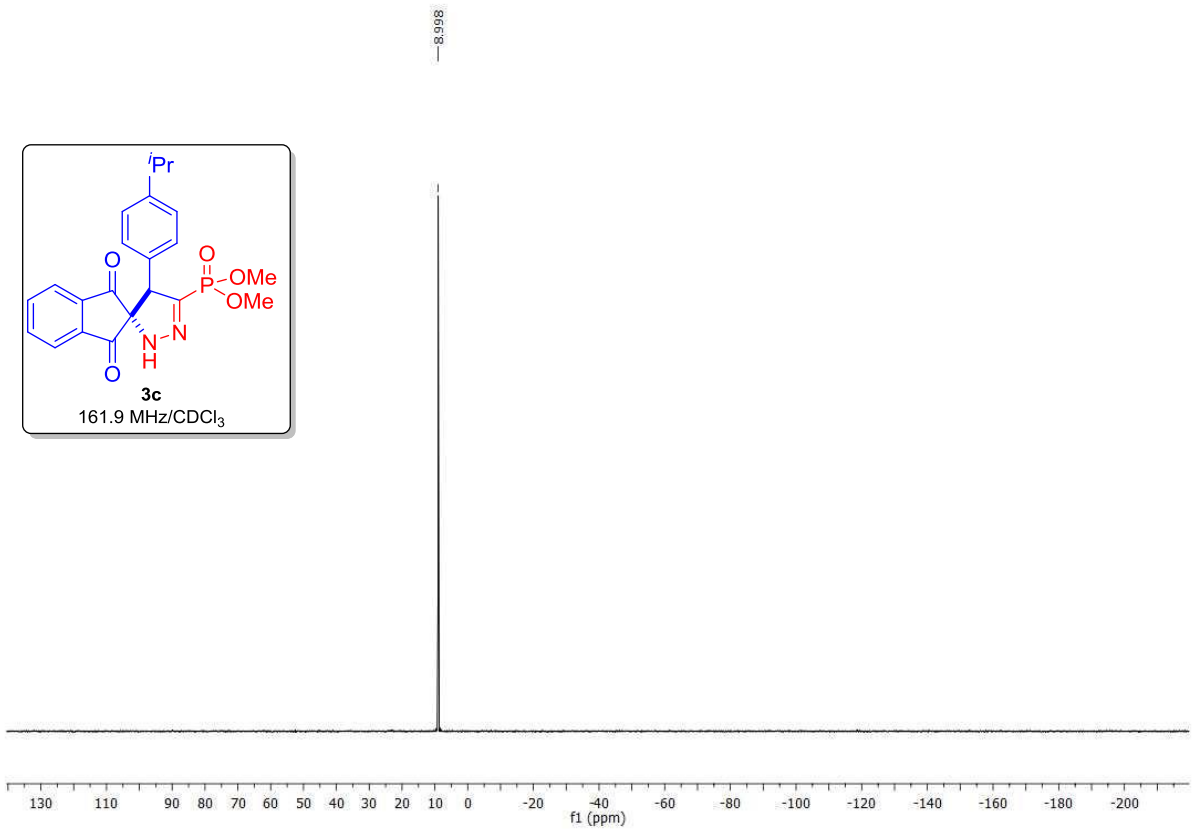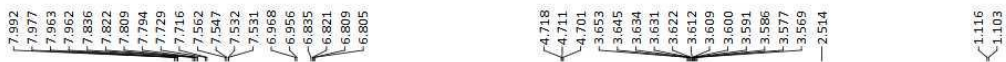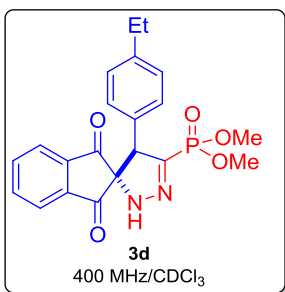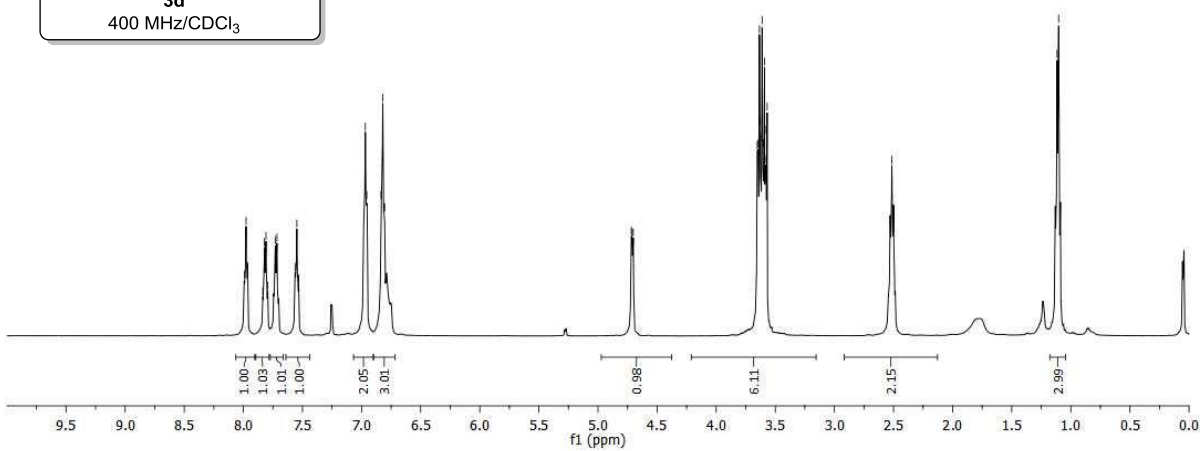

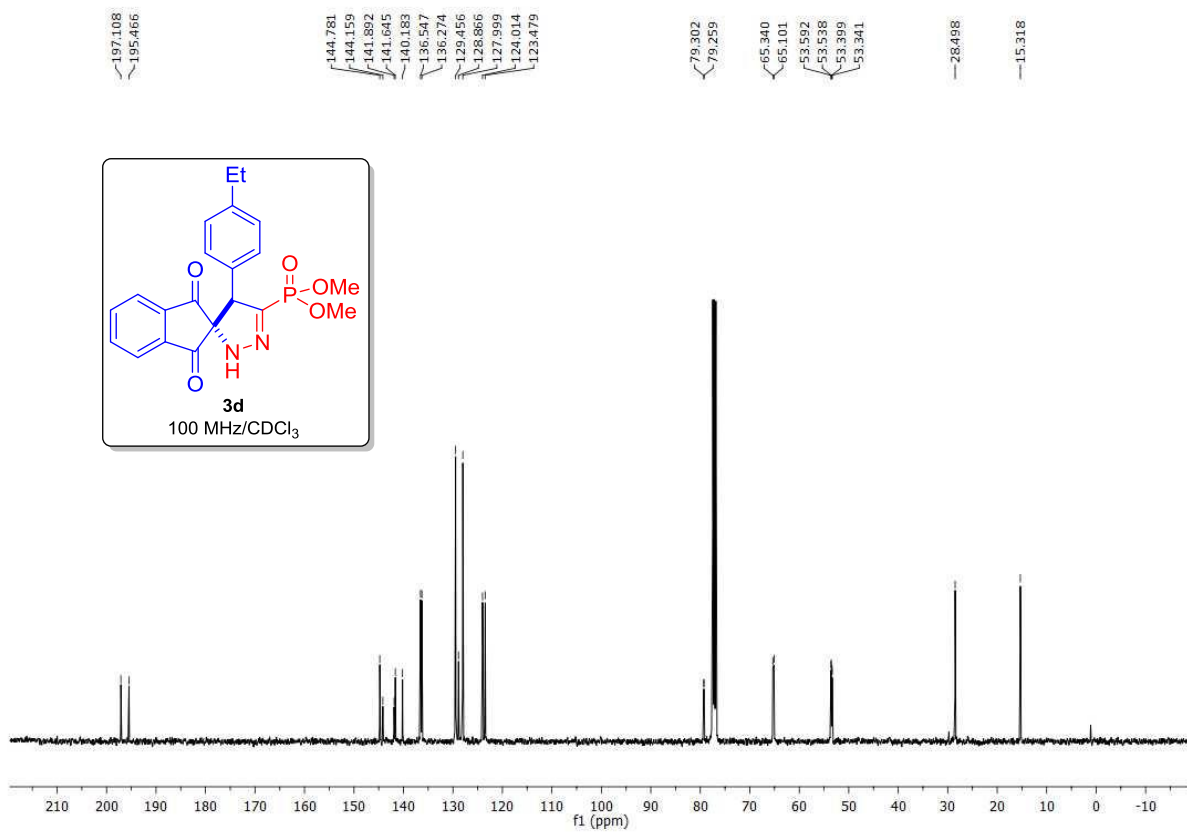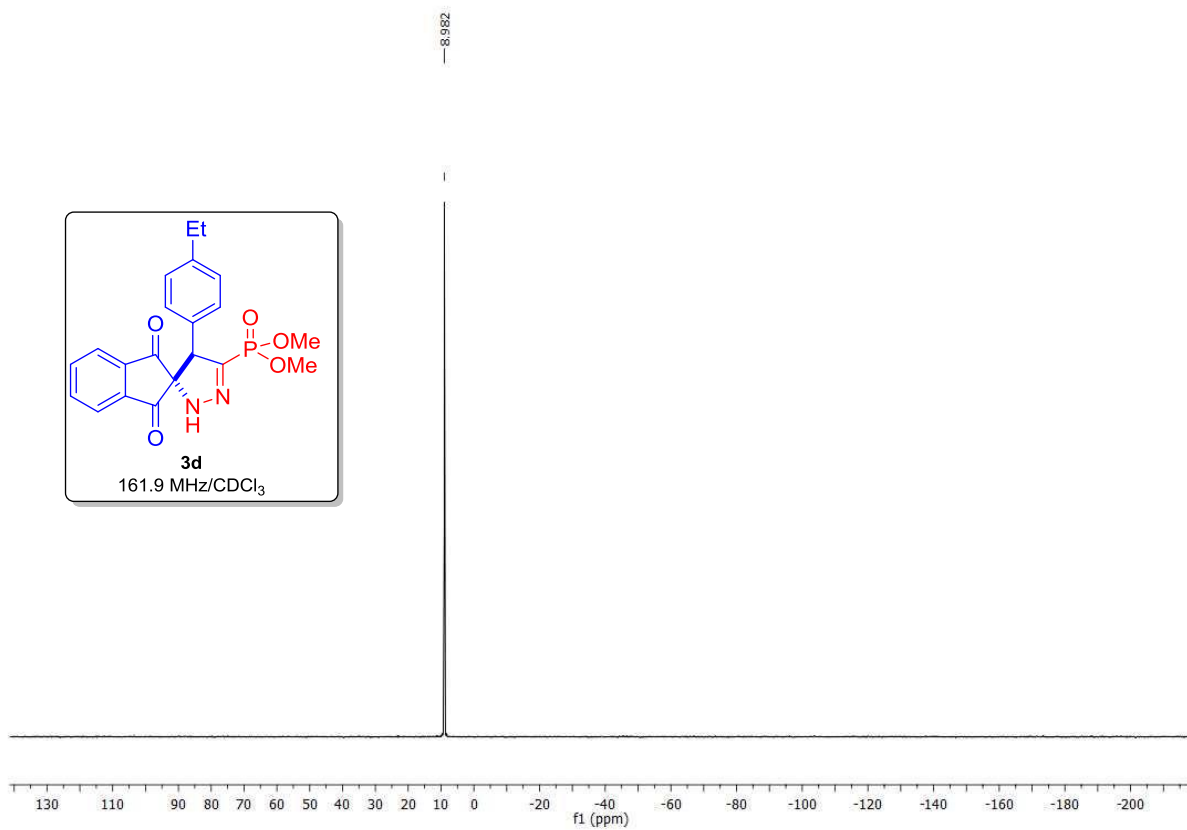

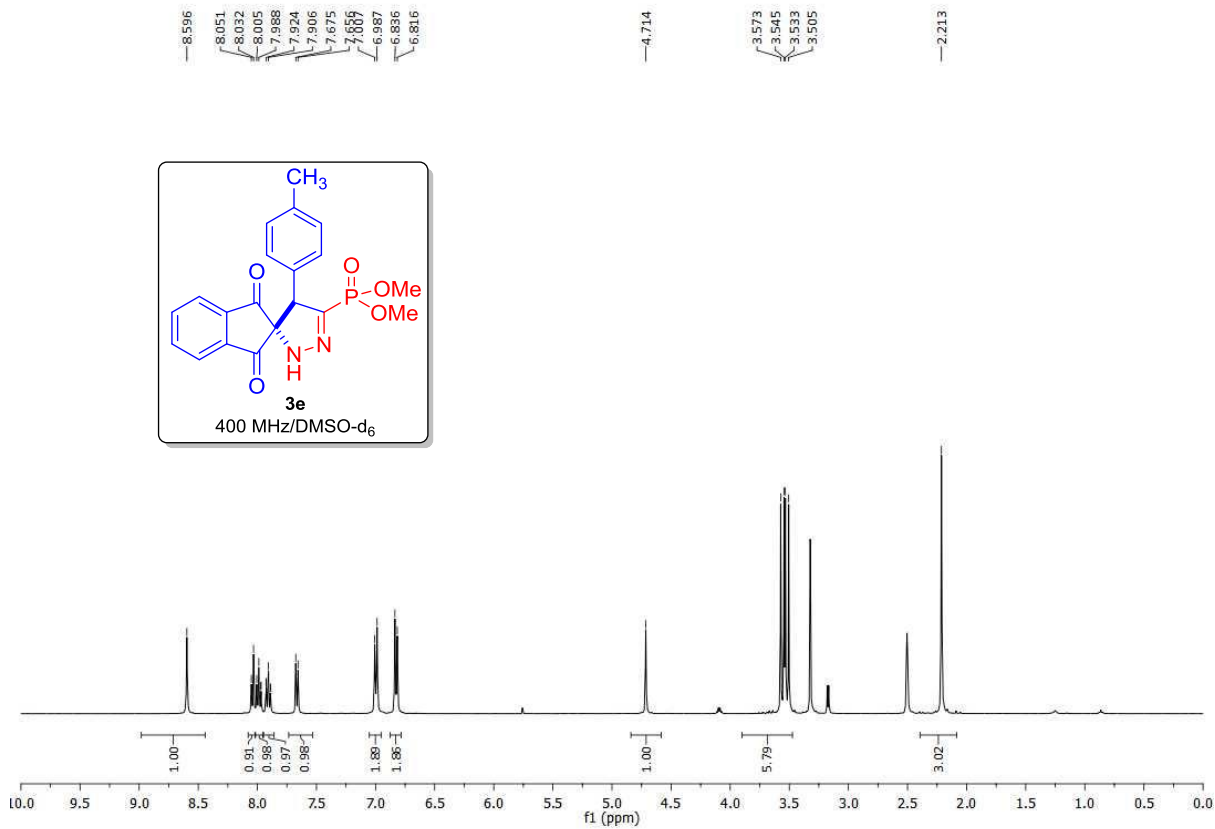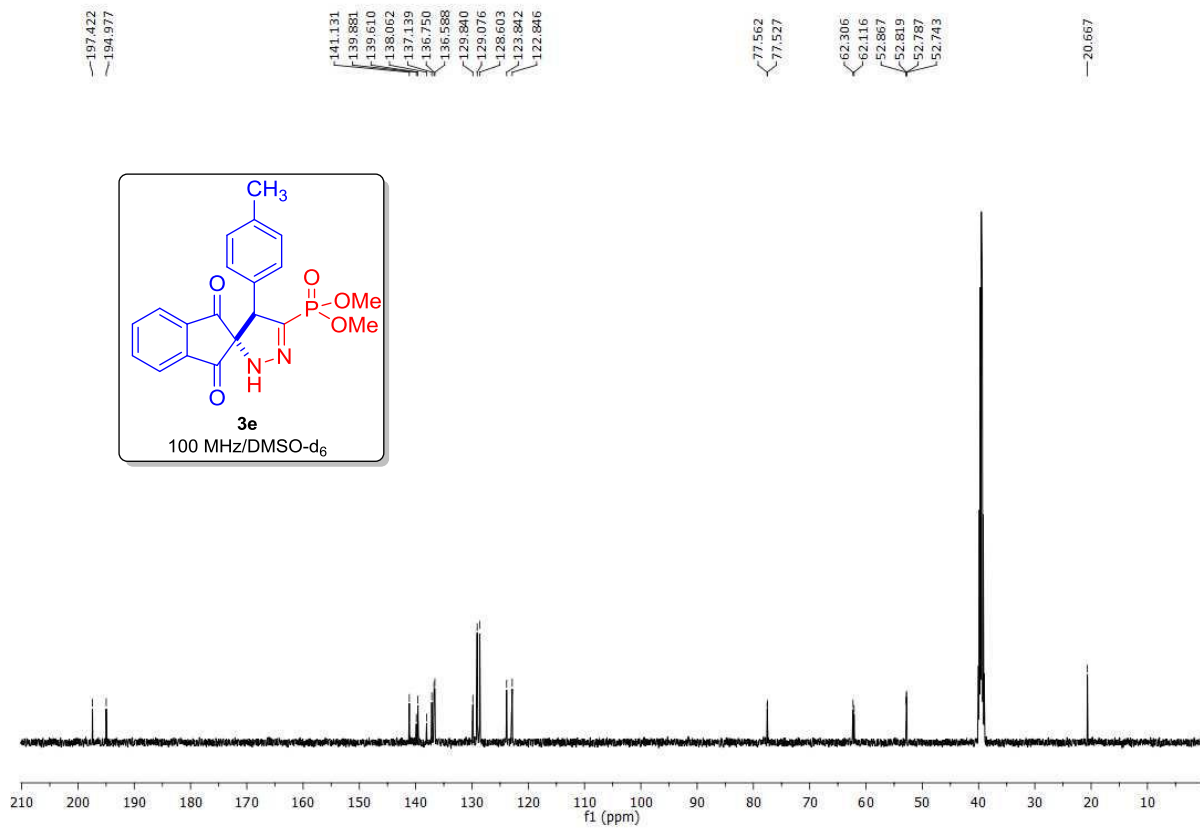

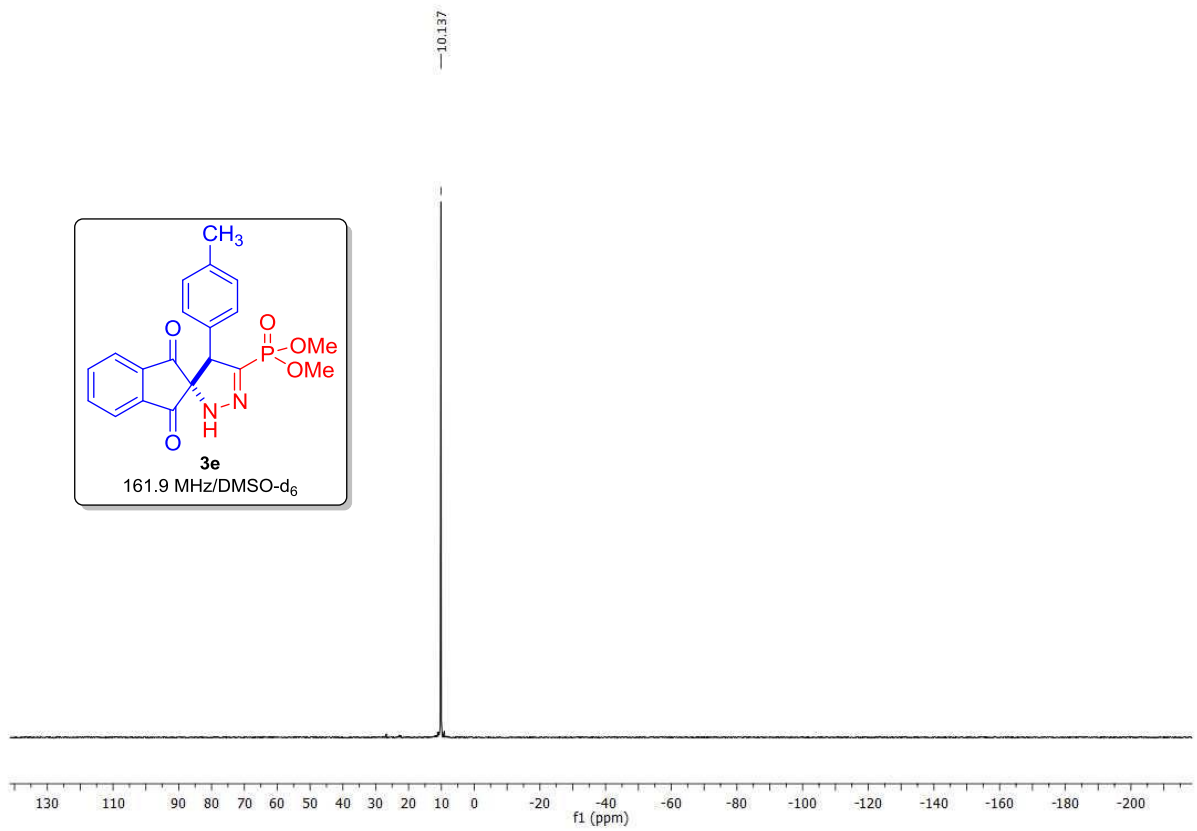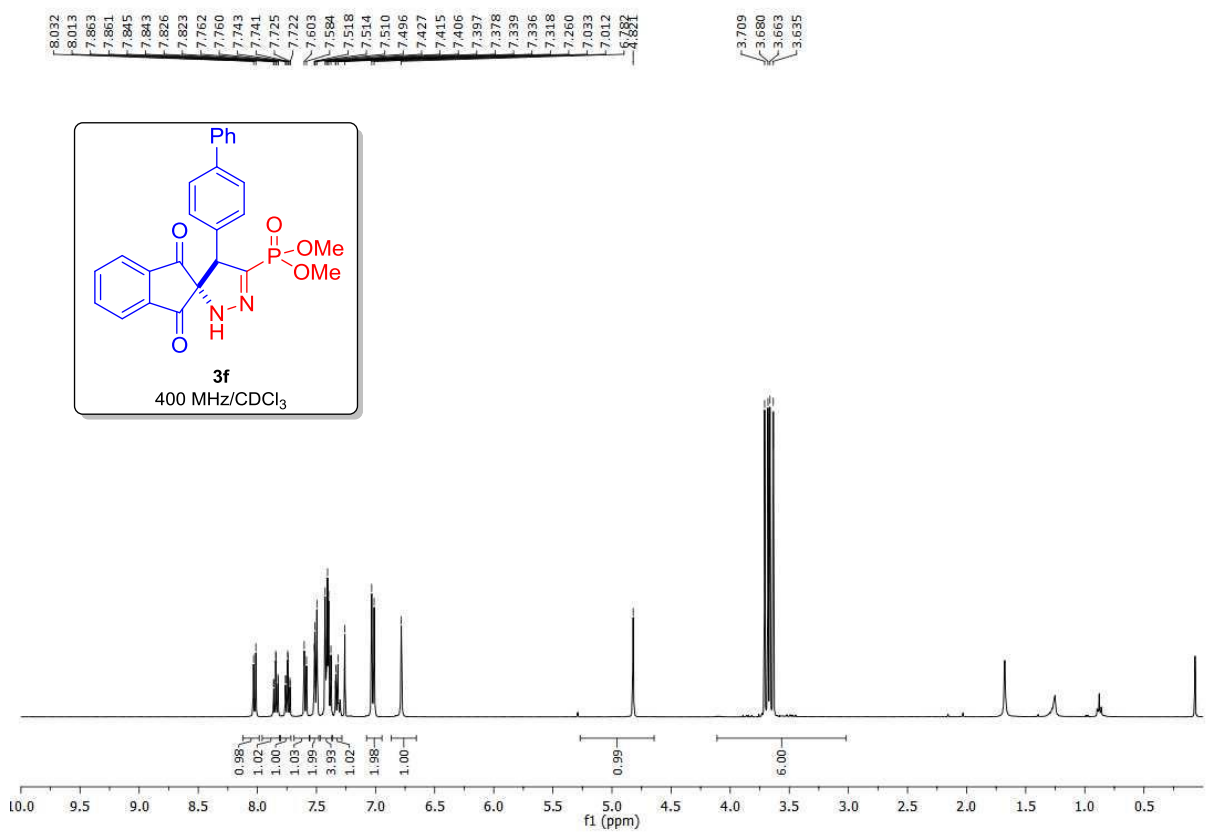

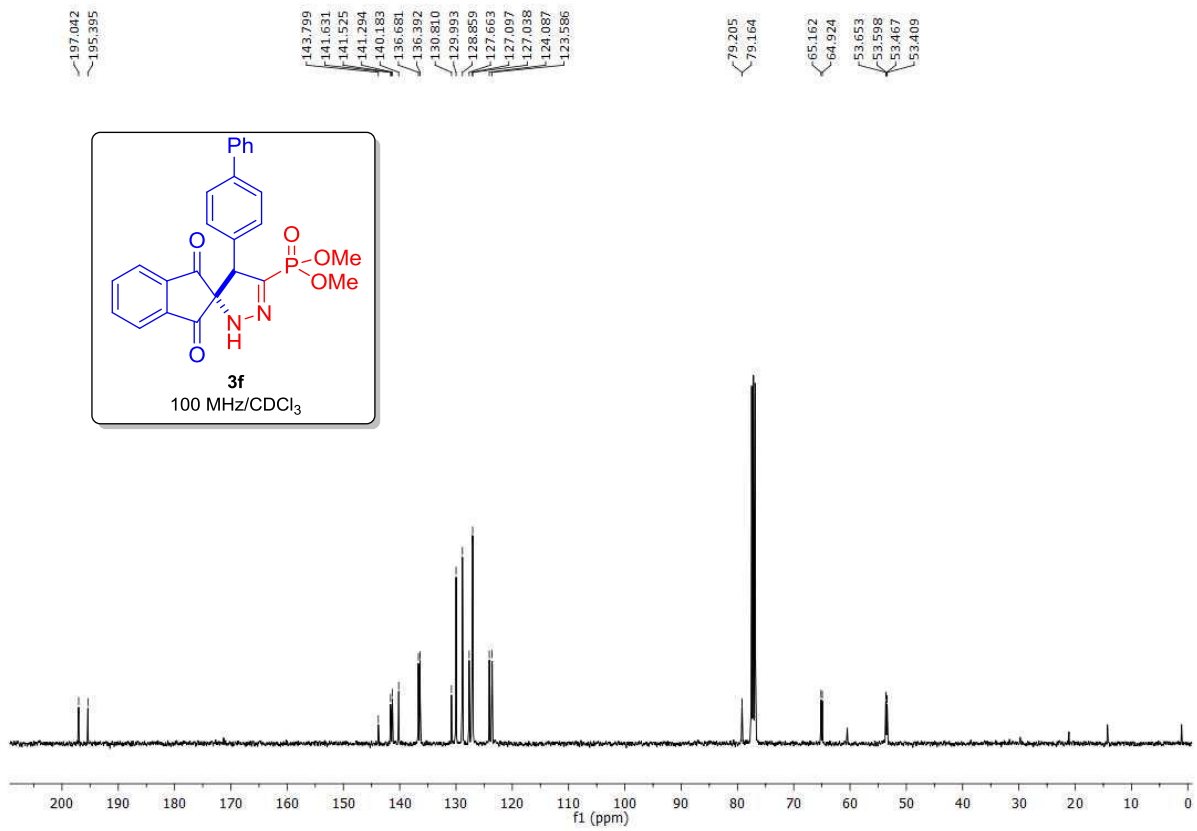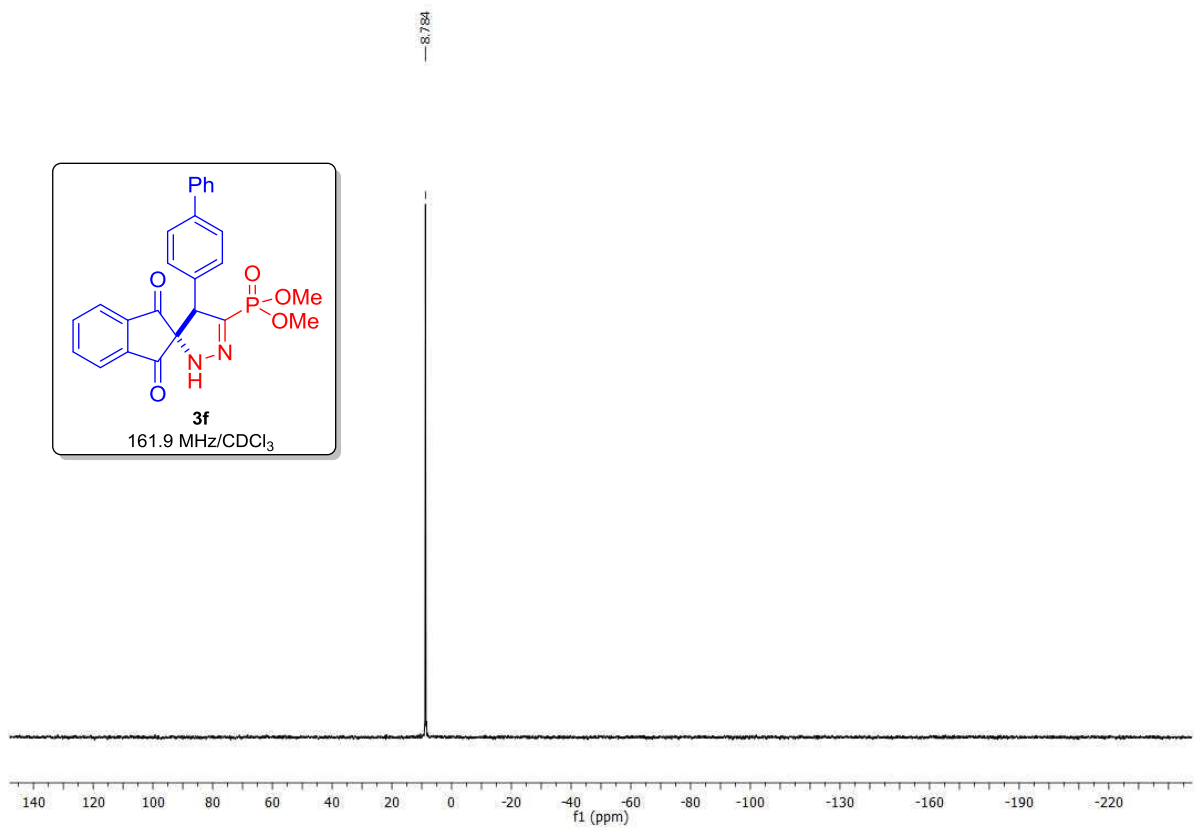

8.036  
7.897  
7.878  
7.862  
7.809  
7.790  
7.669  
7.650  
7.337  
7.316  
6.866  
6.845  
6.697  
4.739  
3.724  
3.696  
3.687  
3.659

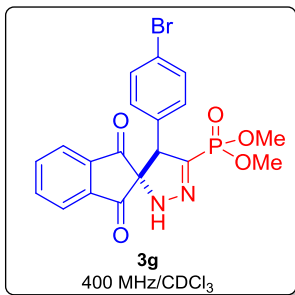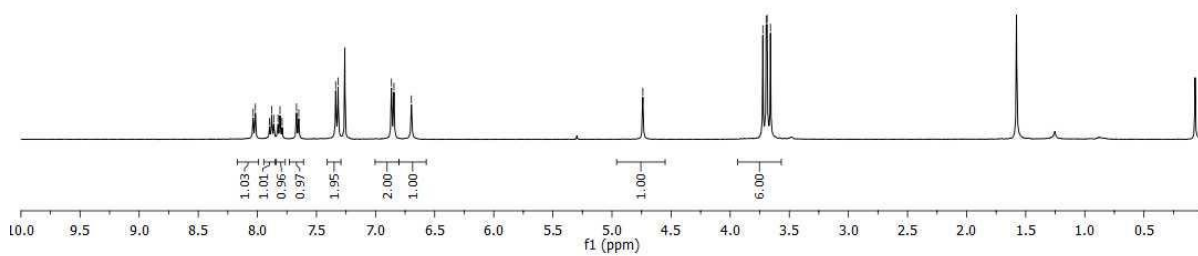

196.224  
194.098  
140.517  
138.975  
138.907  
136.671  
135.624  
135.444  
130.883  
130.341  
130.147  
122.923  
122.221  
121.316  
61.781  
61.546  
52.231  
52.175

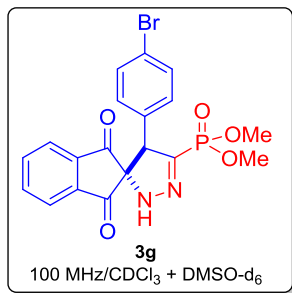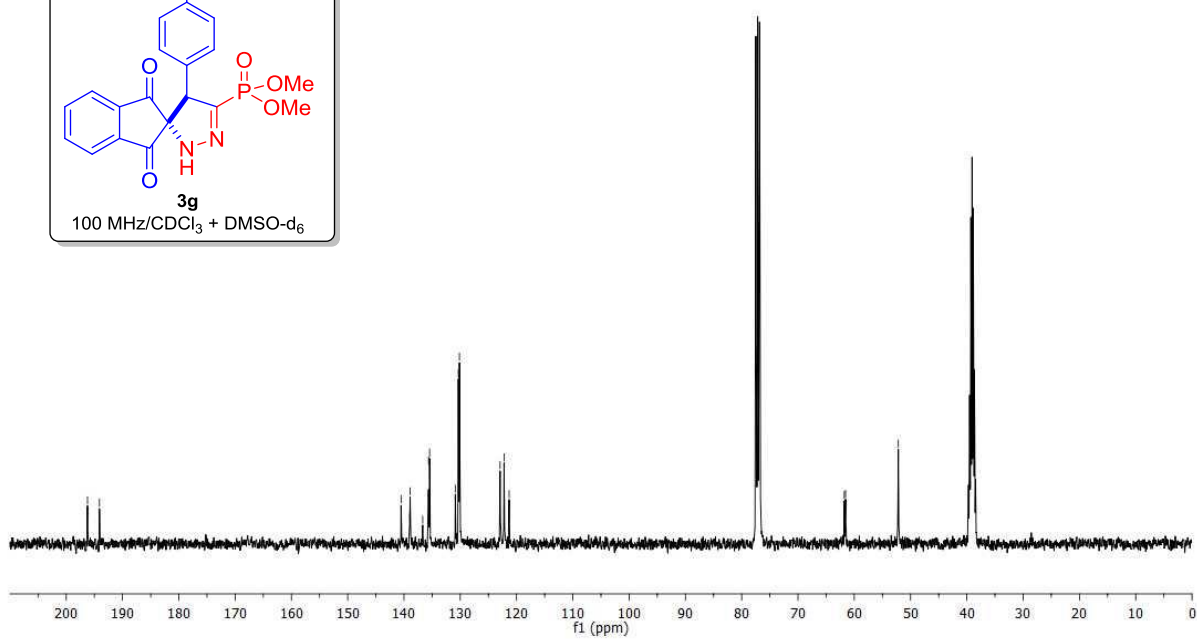

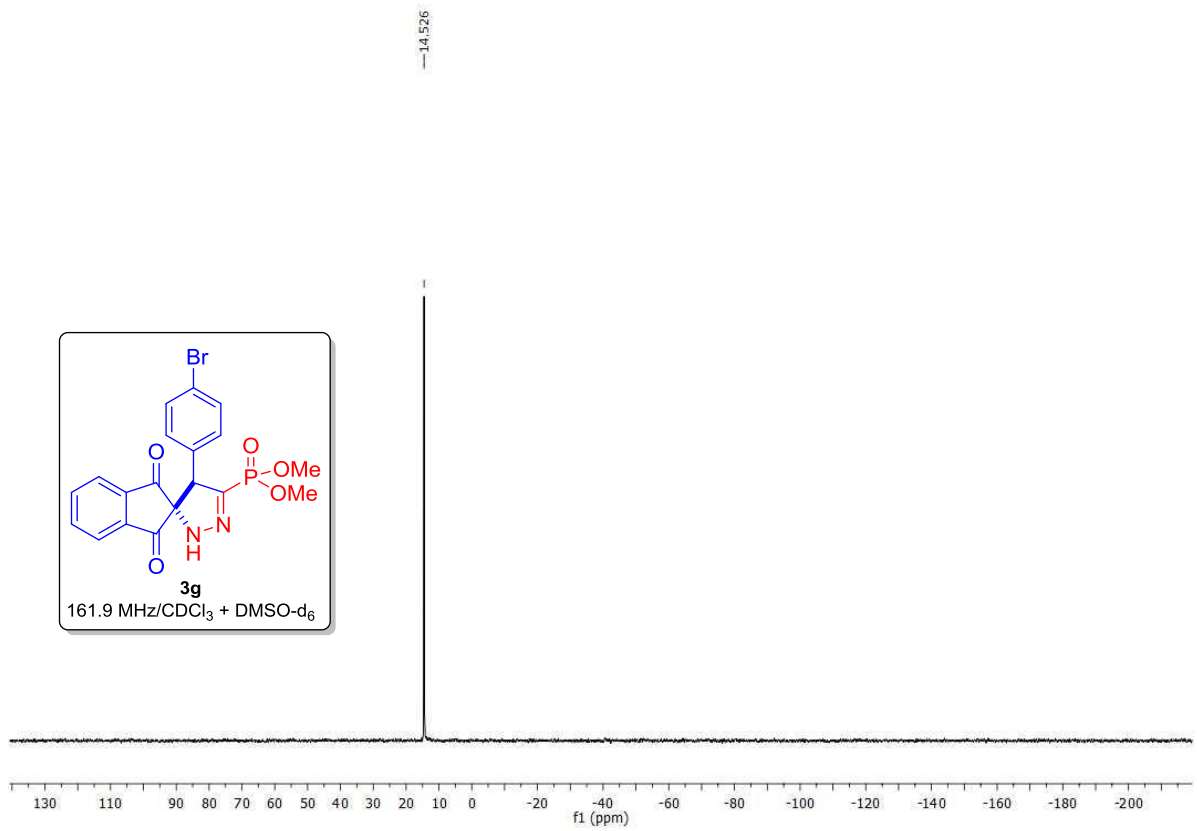

—8.672  
 —8.047  
 —8.006  
 —7.925  
 —7.711  
 —7.290  
 —7.282  
 —6.997  
 —6.987  
 —4.843  
 —3.598  
 —3.575  
 —3.573  
 —3.558  
 —3.536

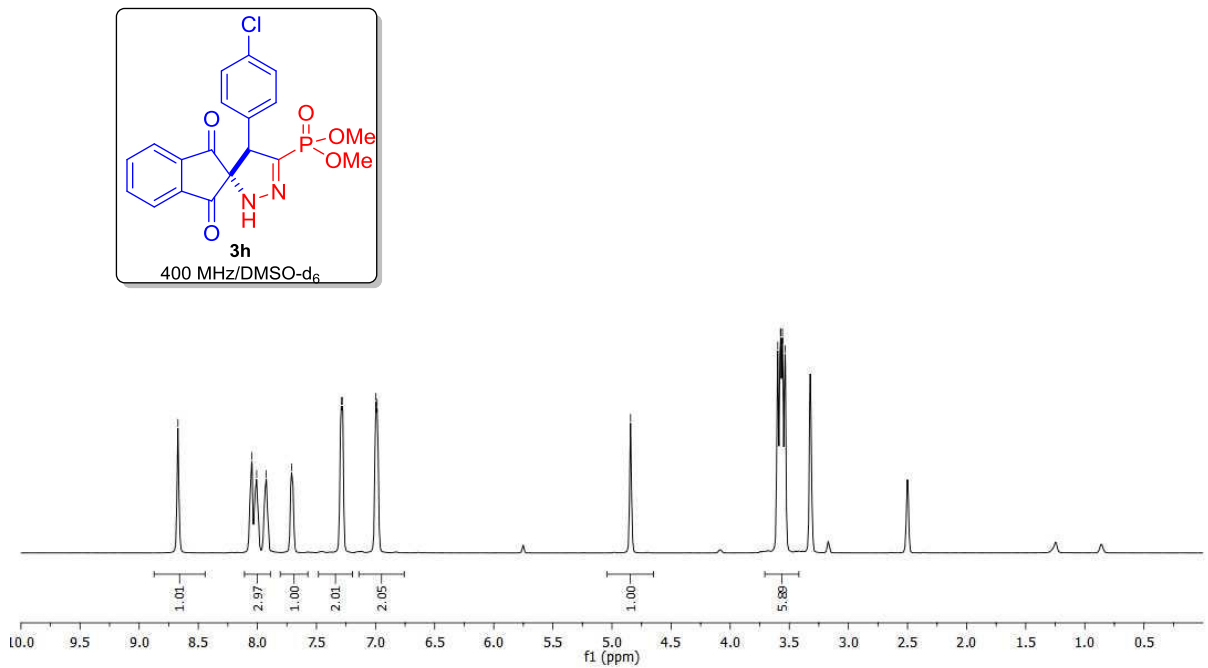



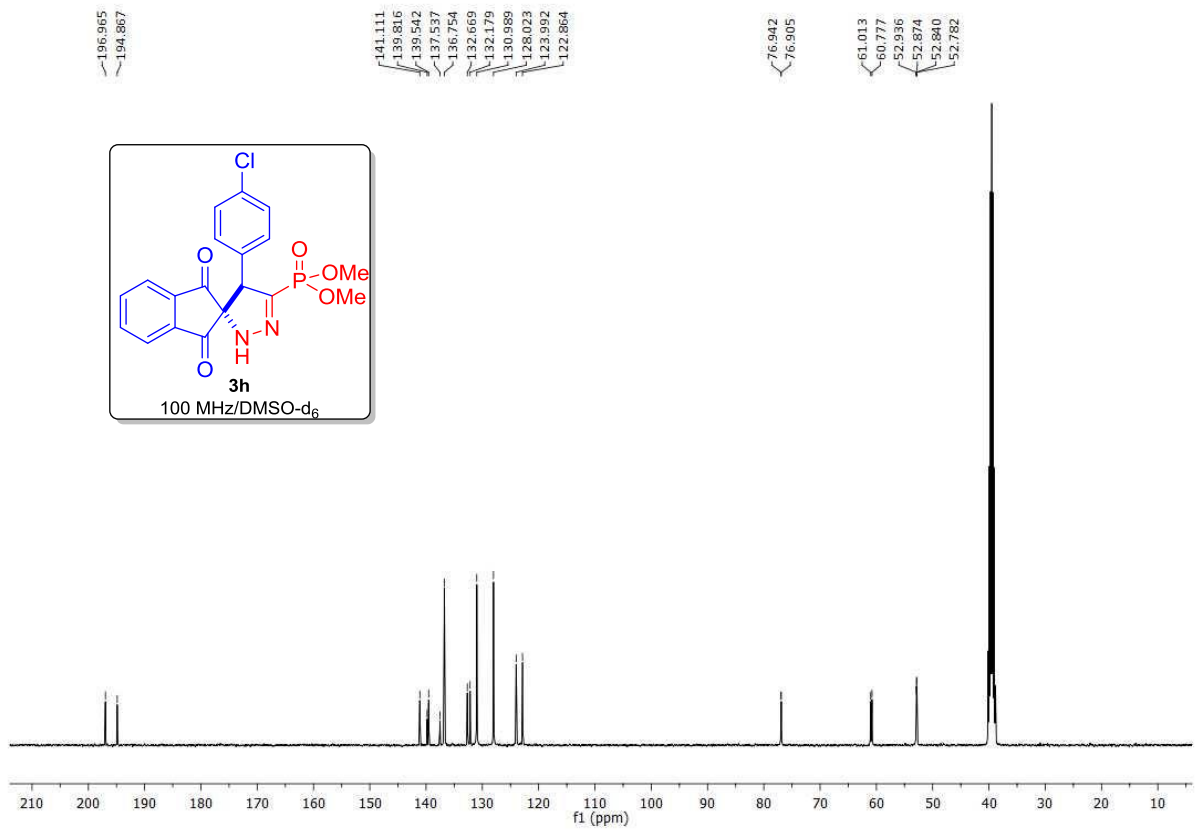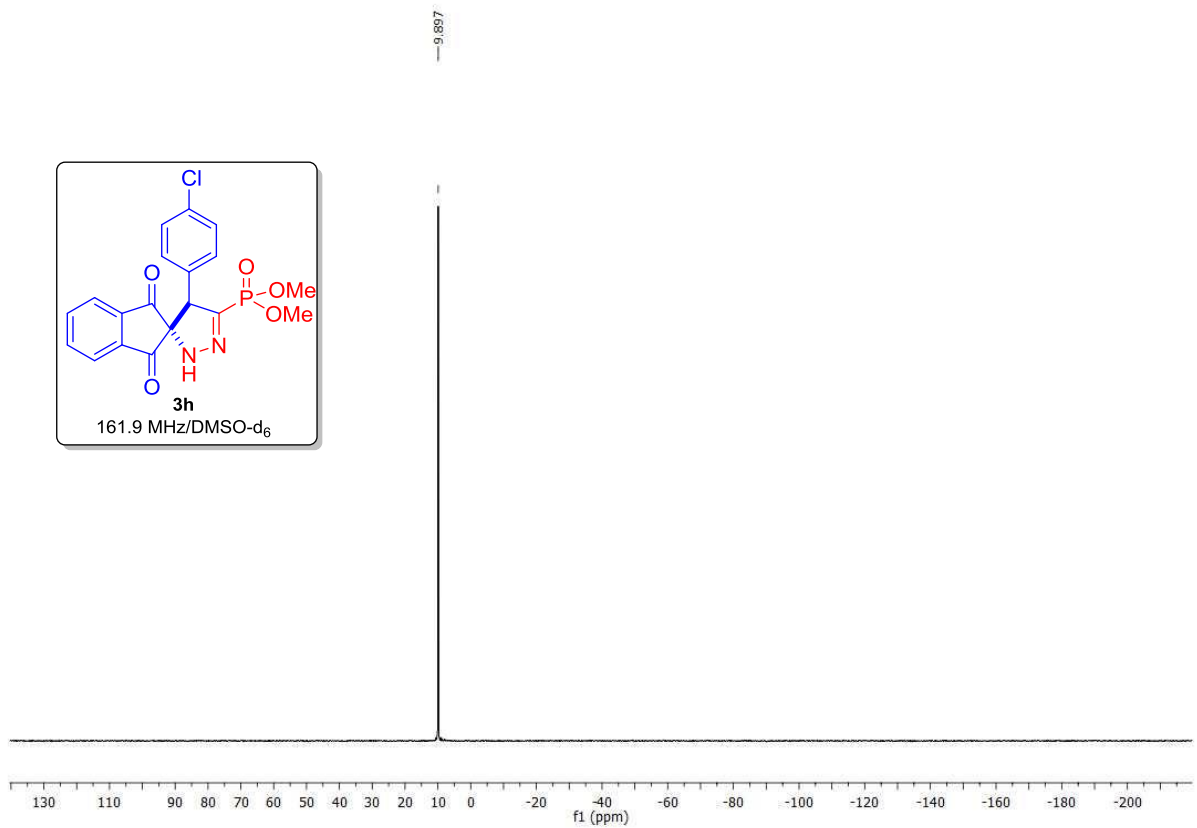

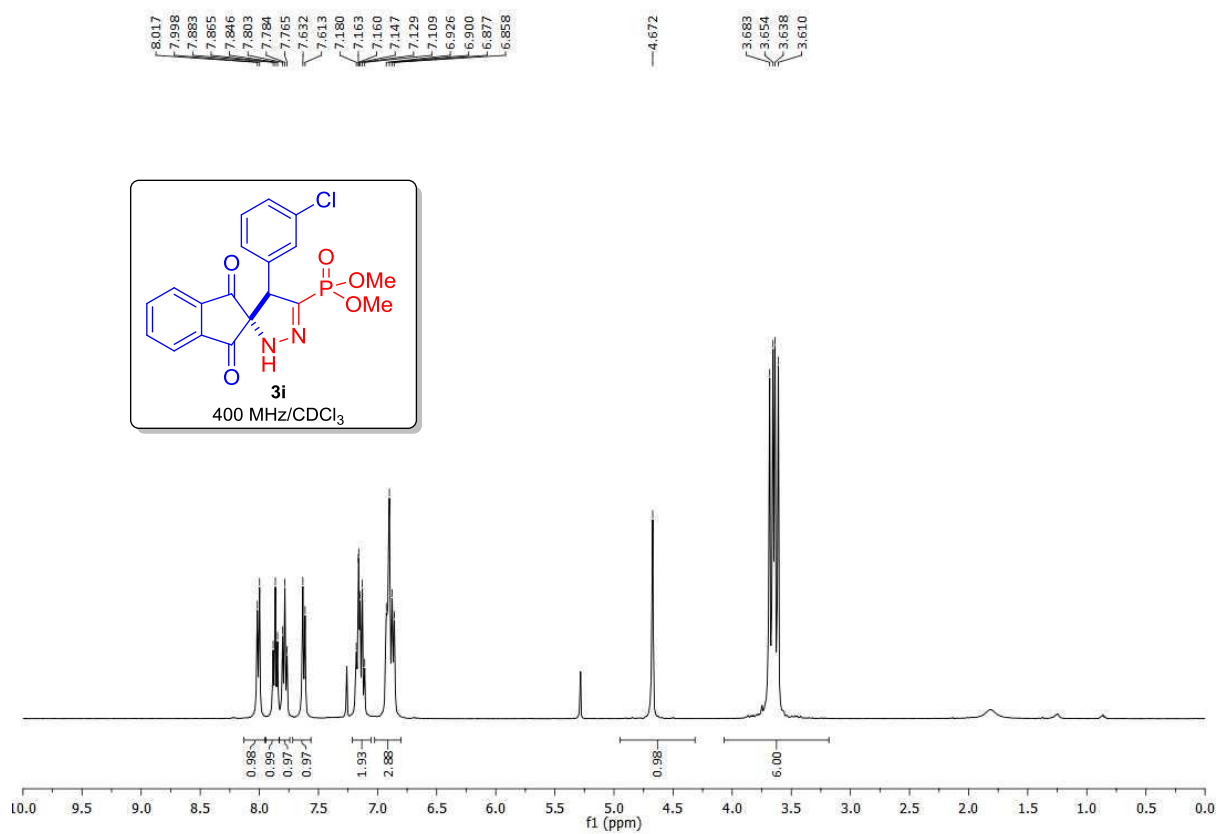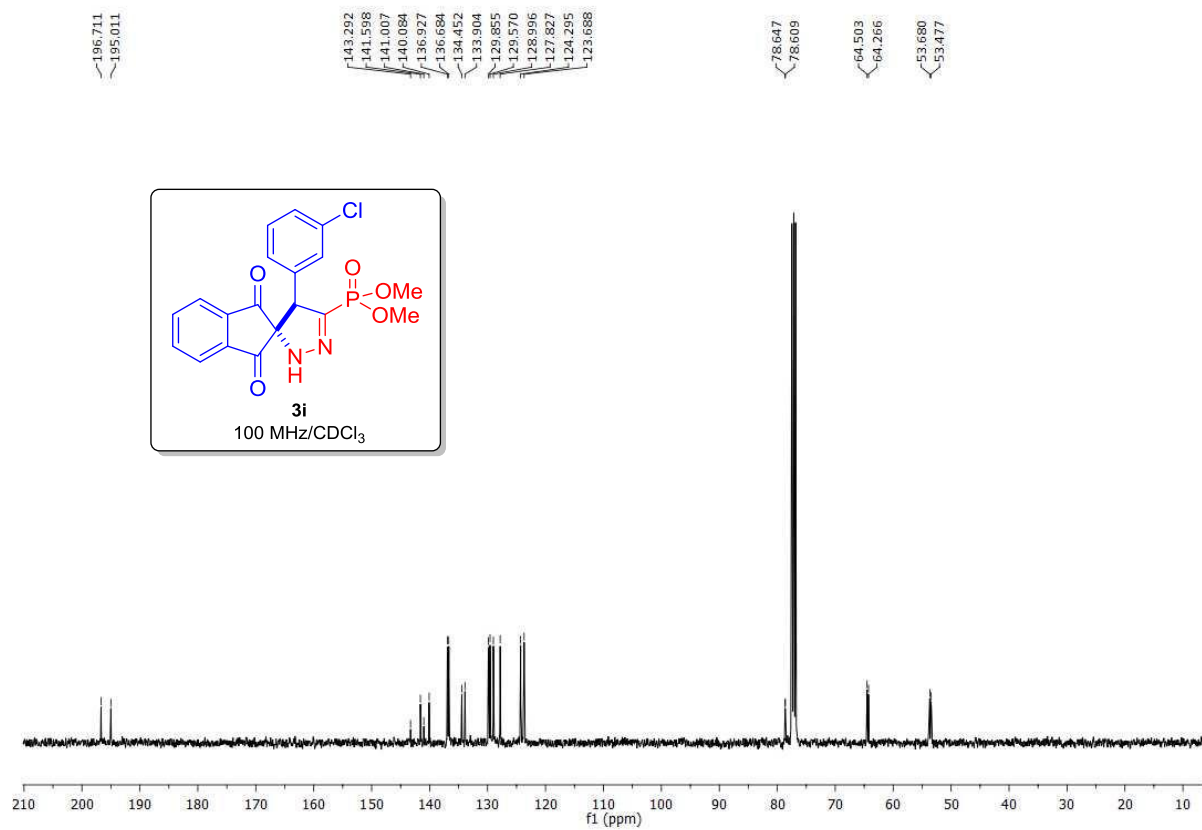

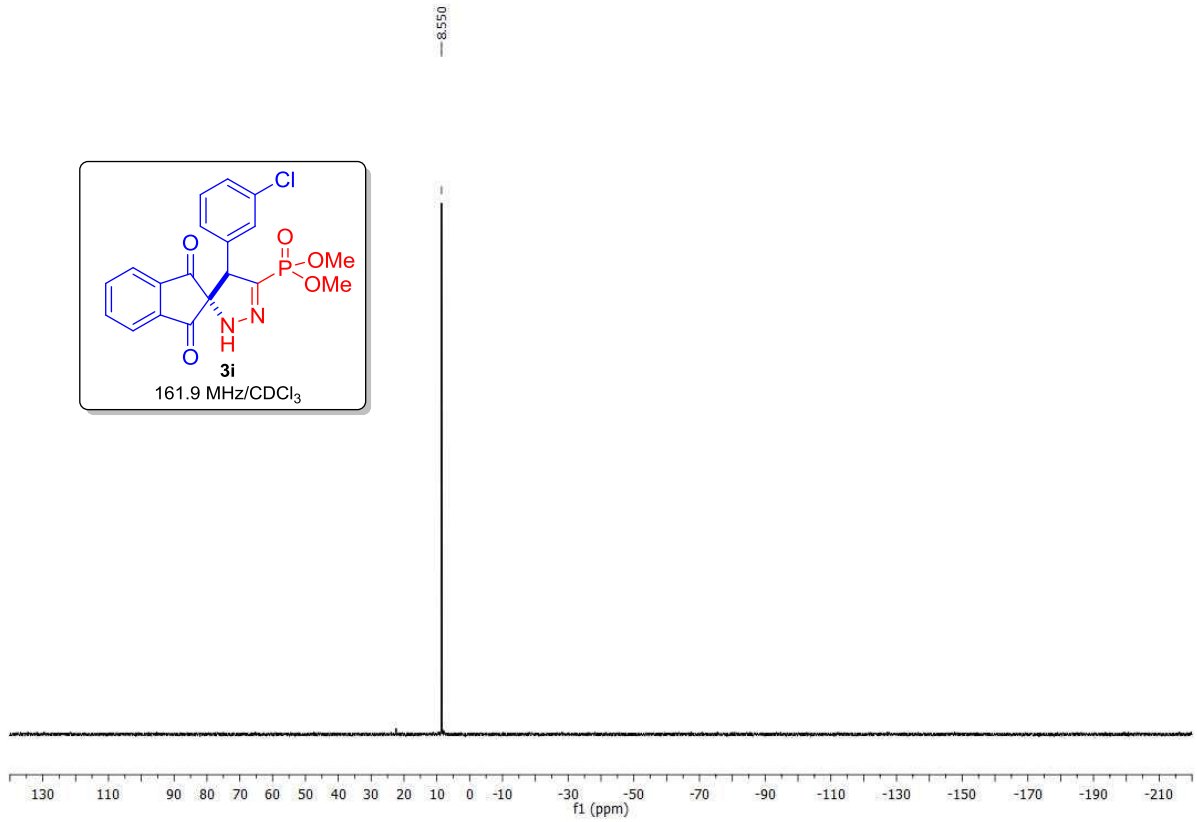

7.960  
7.941  
7.803  
7.718  
7.555  
7.536  
7.039  
7.020  
7.000  
6.959  
6.686  
6.681  
6.665  
6.661  
6.470  
6.446  
6.441

4.670

3.637  
3.613  
3.599  
3.585  
3.570

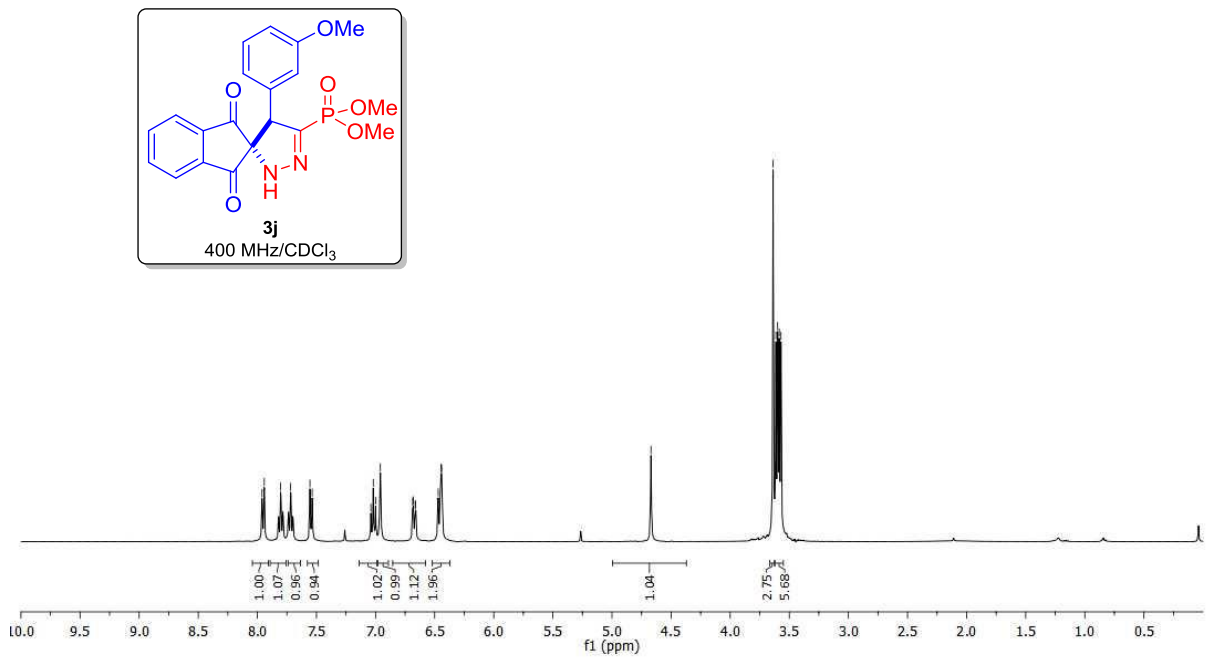

1.00  
1.07  
0.96  
0.94

1.02  
0.99  
1.12  
1.96

1.04

2.75  
5.68

197.085  
195.325

159.495  
143.467  
141.580  
141.191  
140.157  
136.635  
136.282  
133.133  
129.452  
123.978  
123.483  
121.778  
114.766  
114.646

79.186  
79.142

65.324  
65.086  
55.242  
53.566  
53.509  
53.398  
53.337

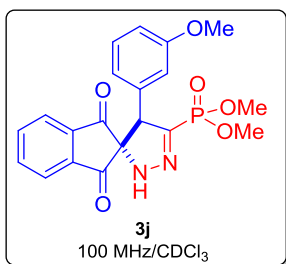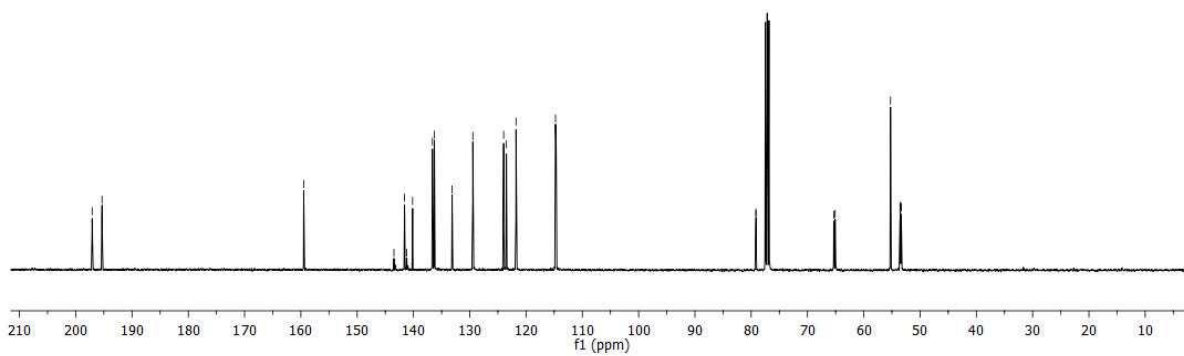

9.081

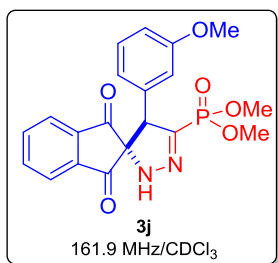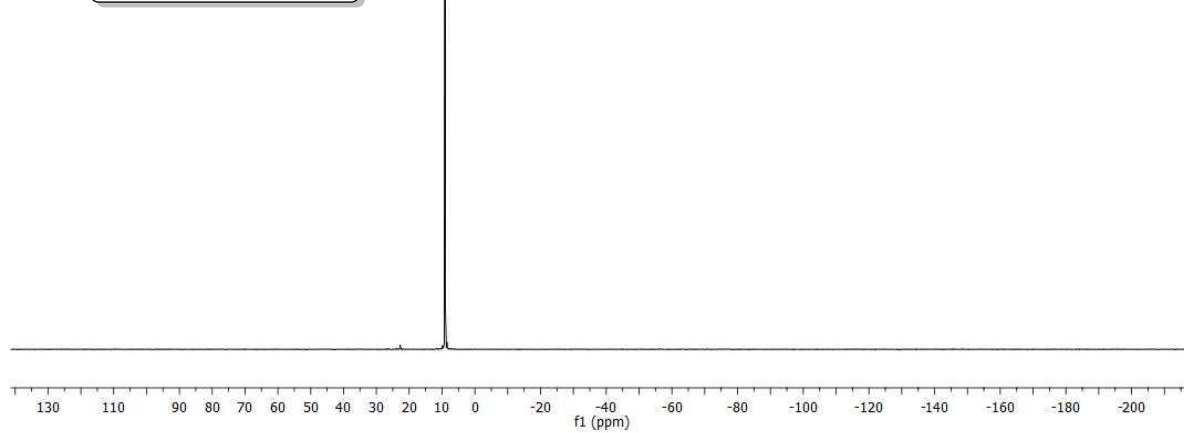

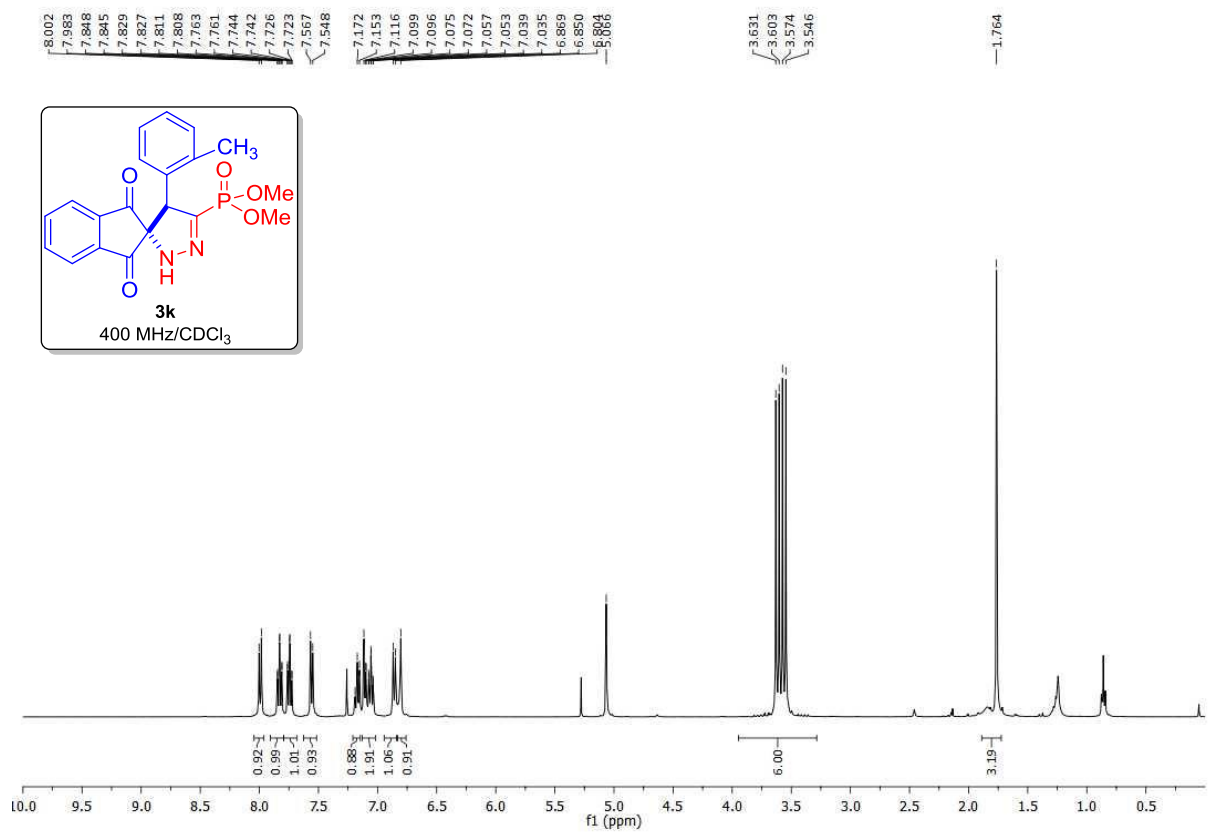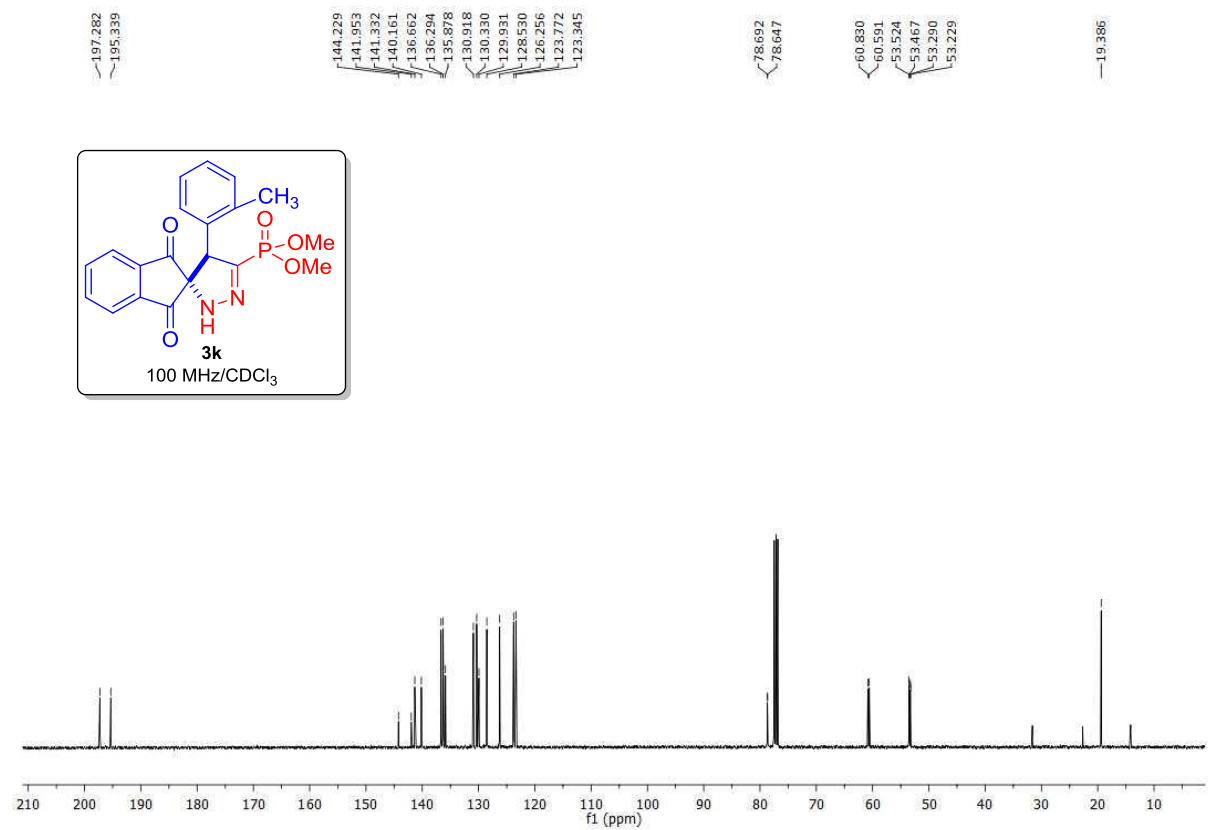

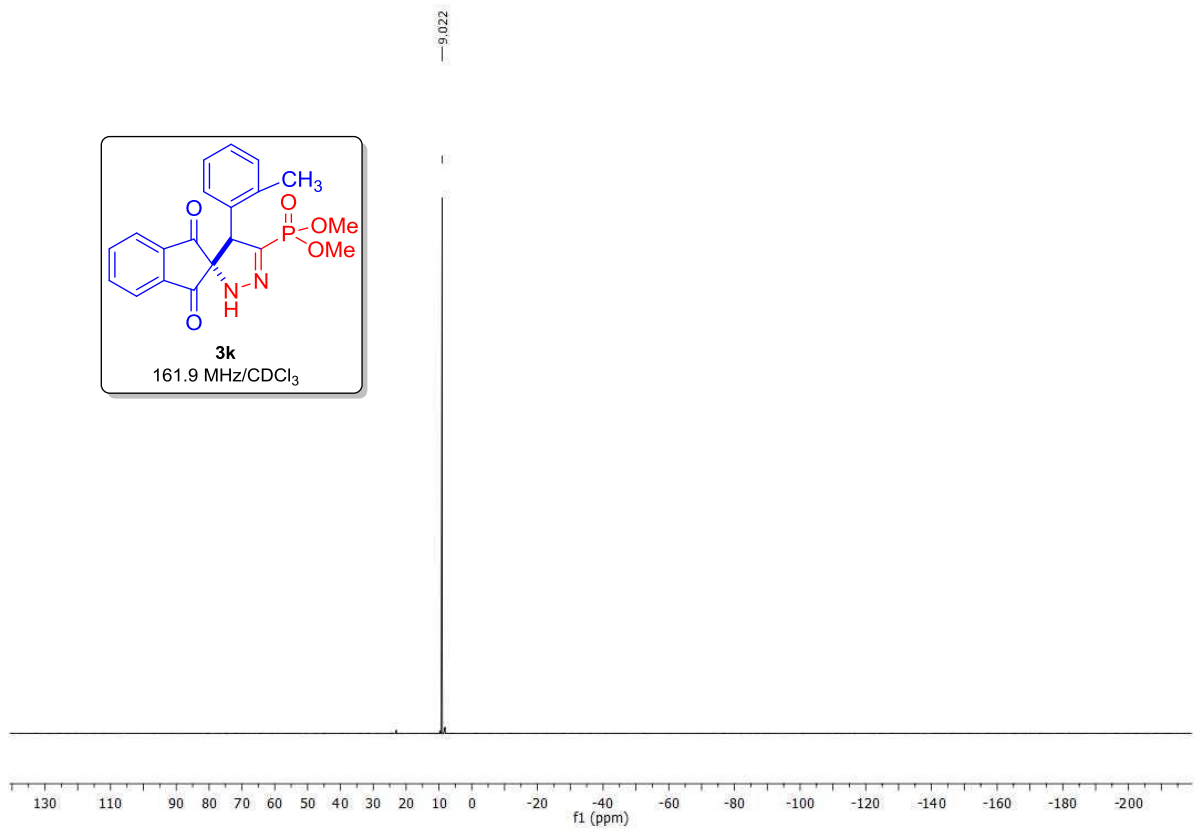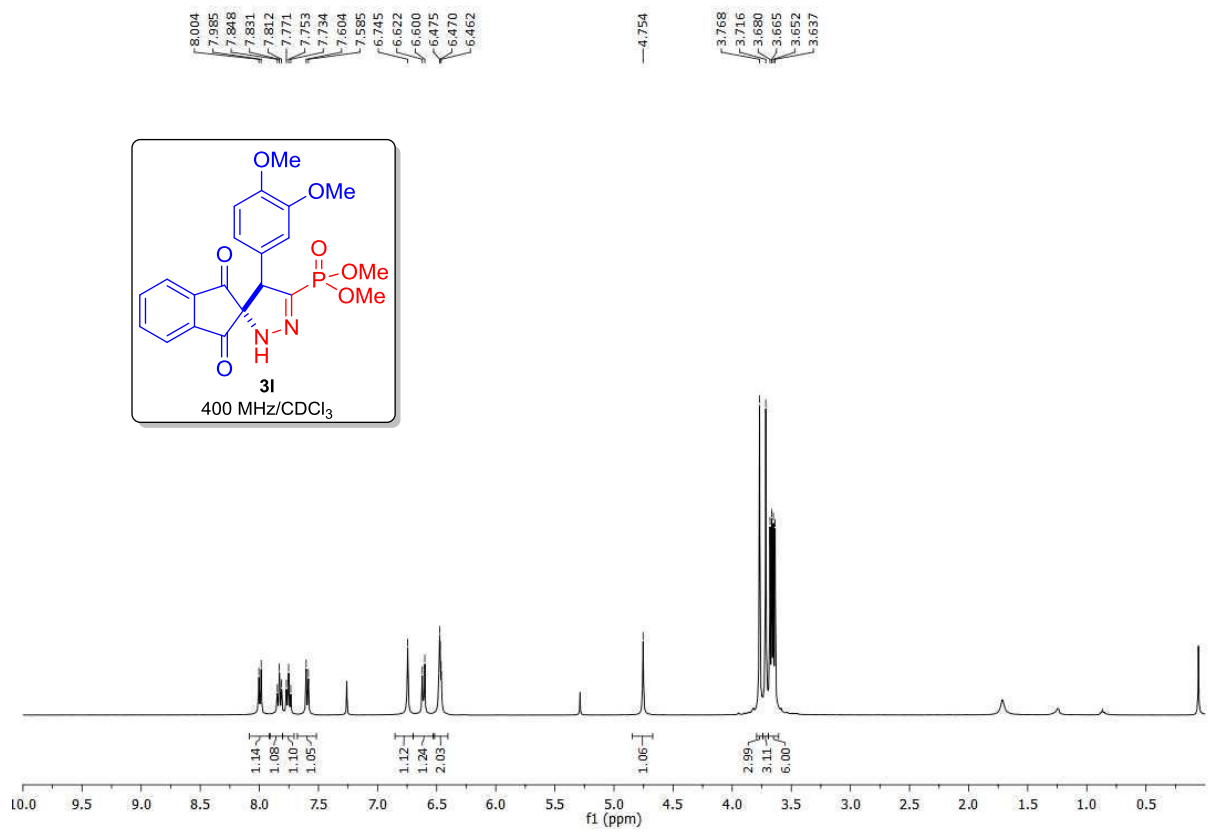

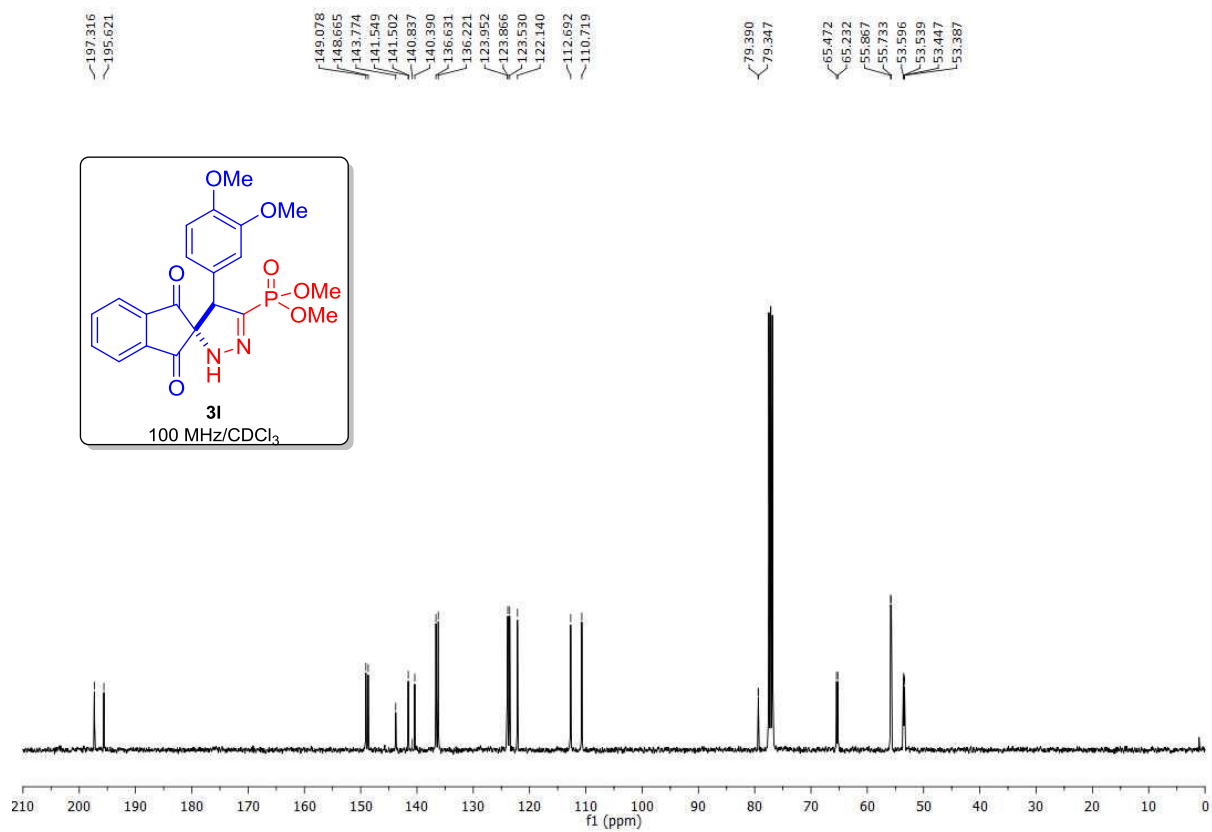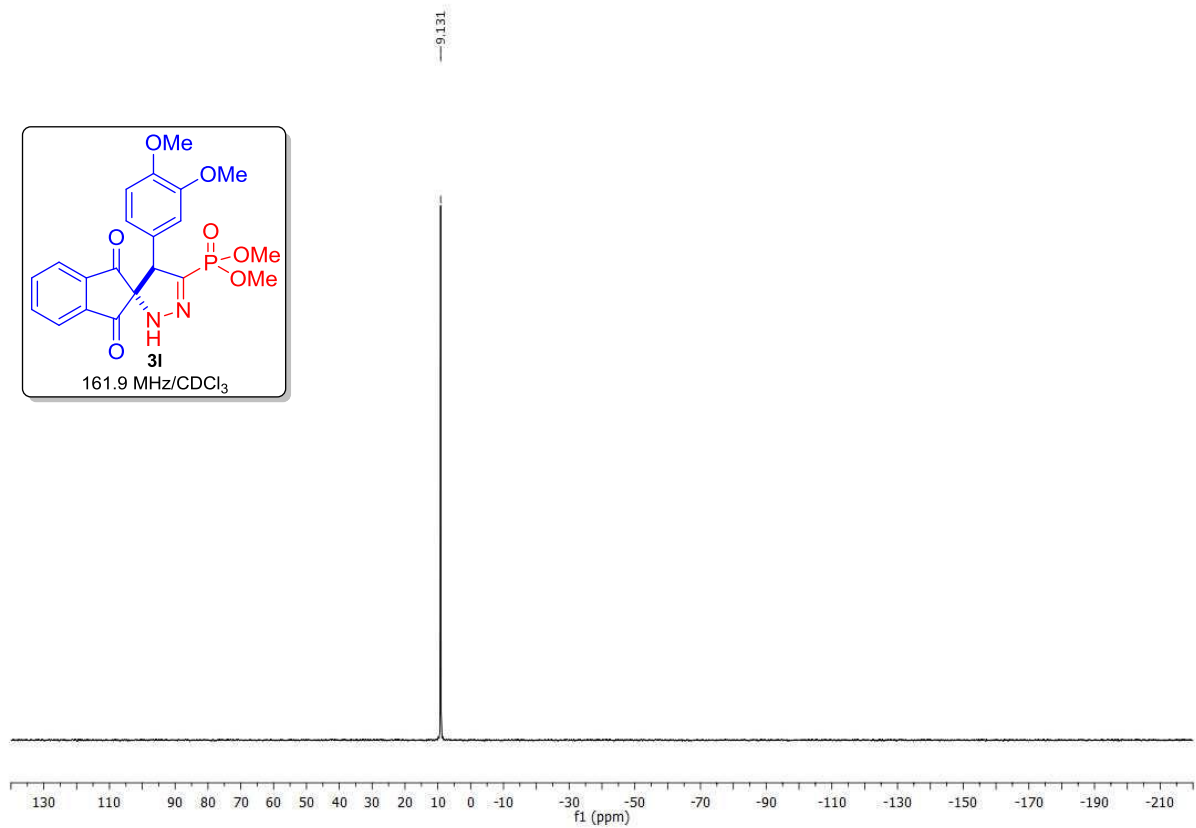

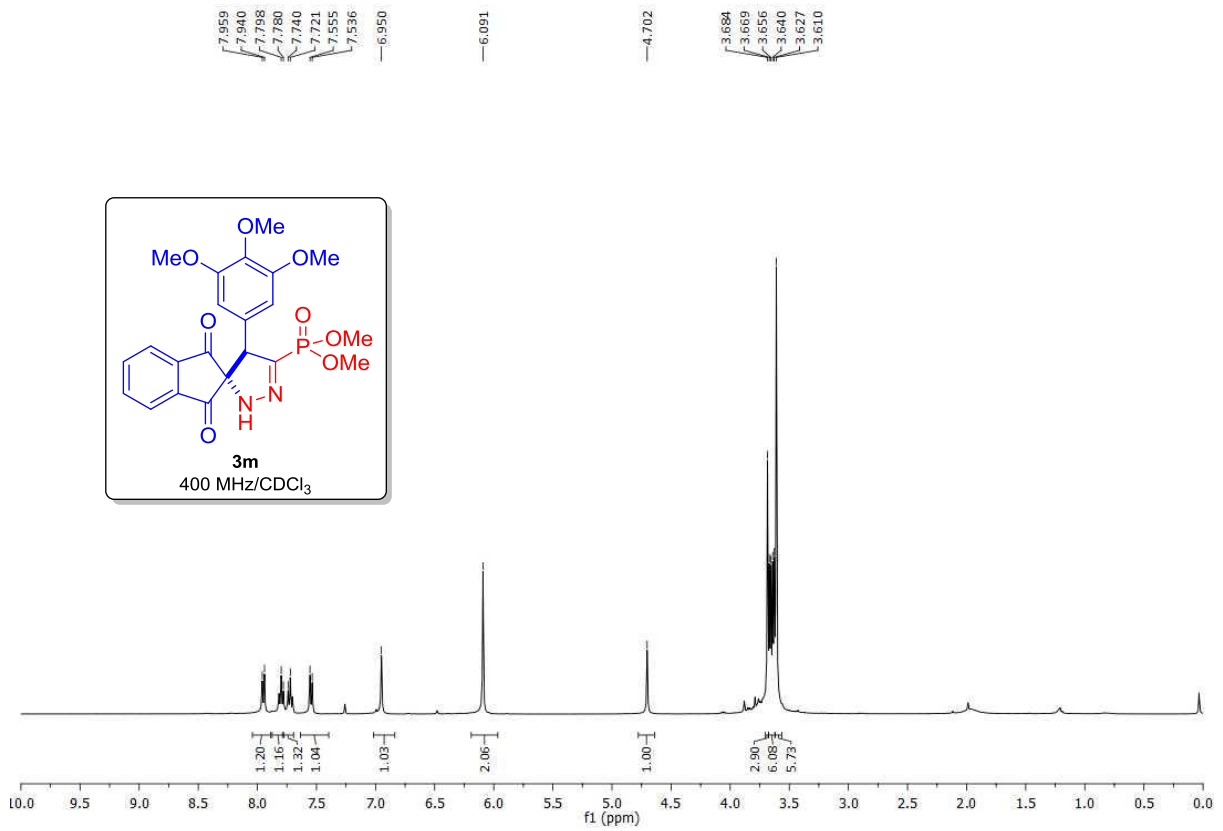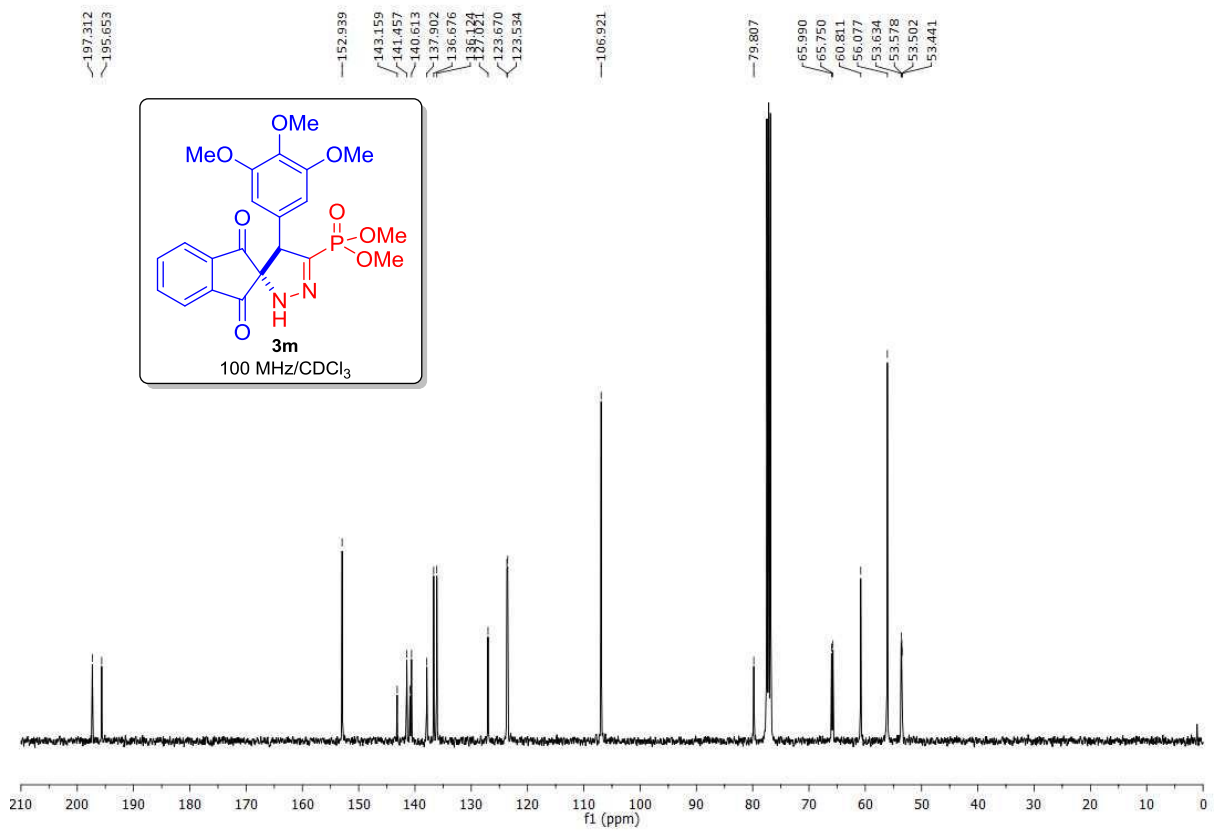



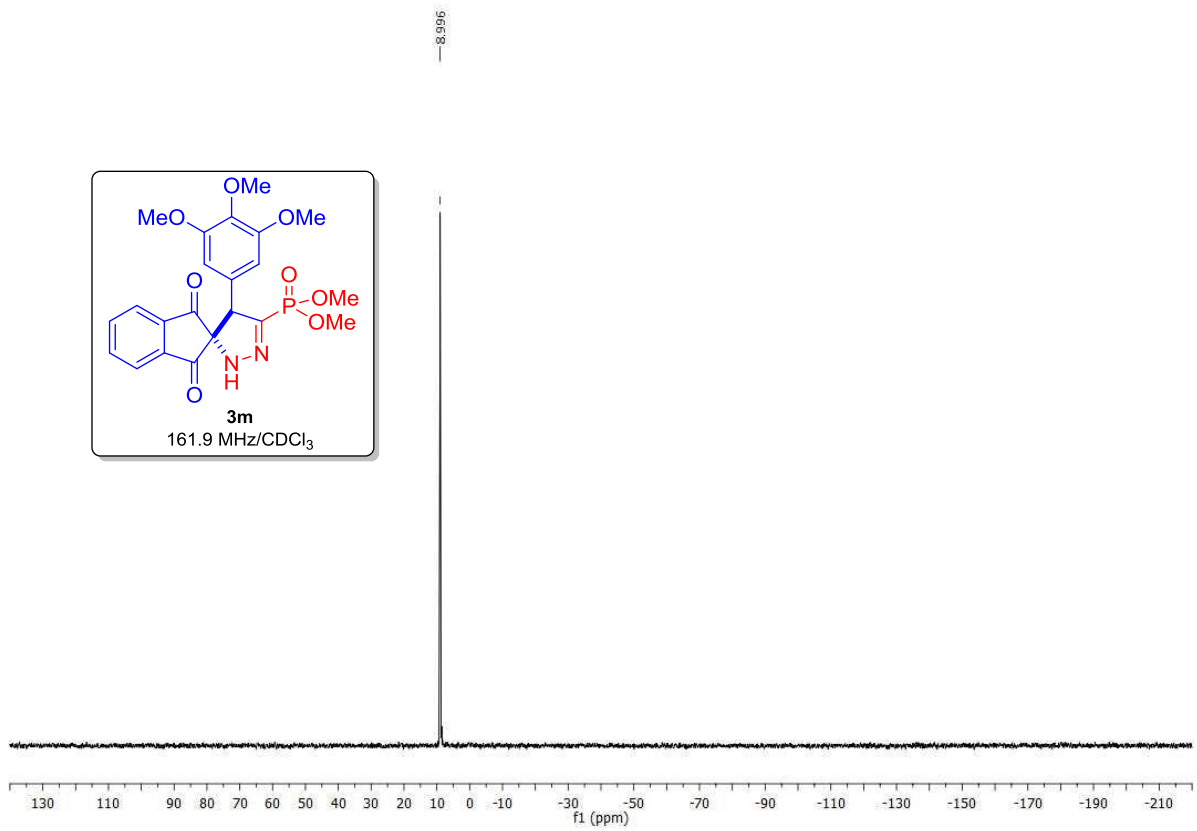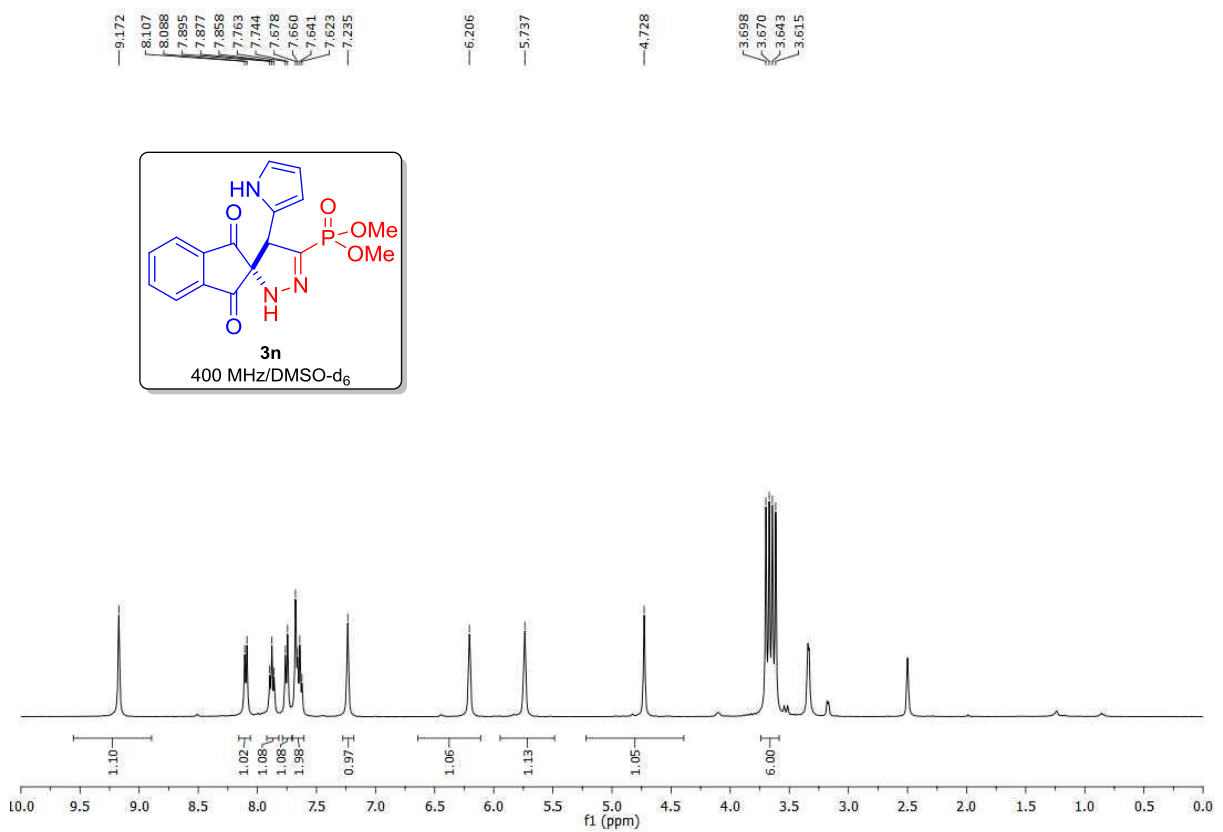

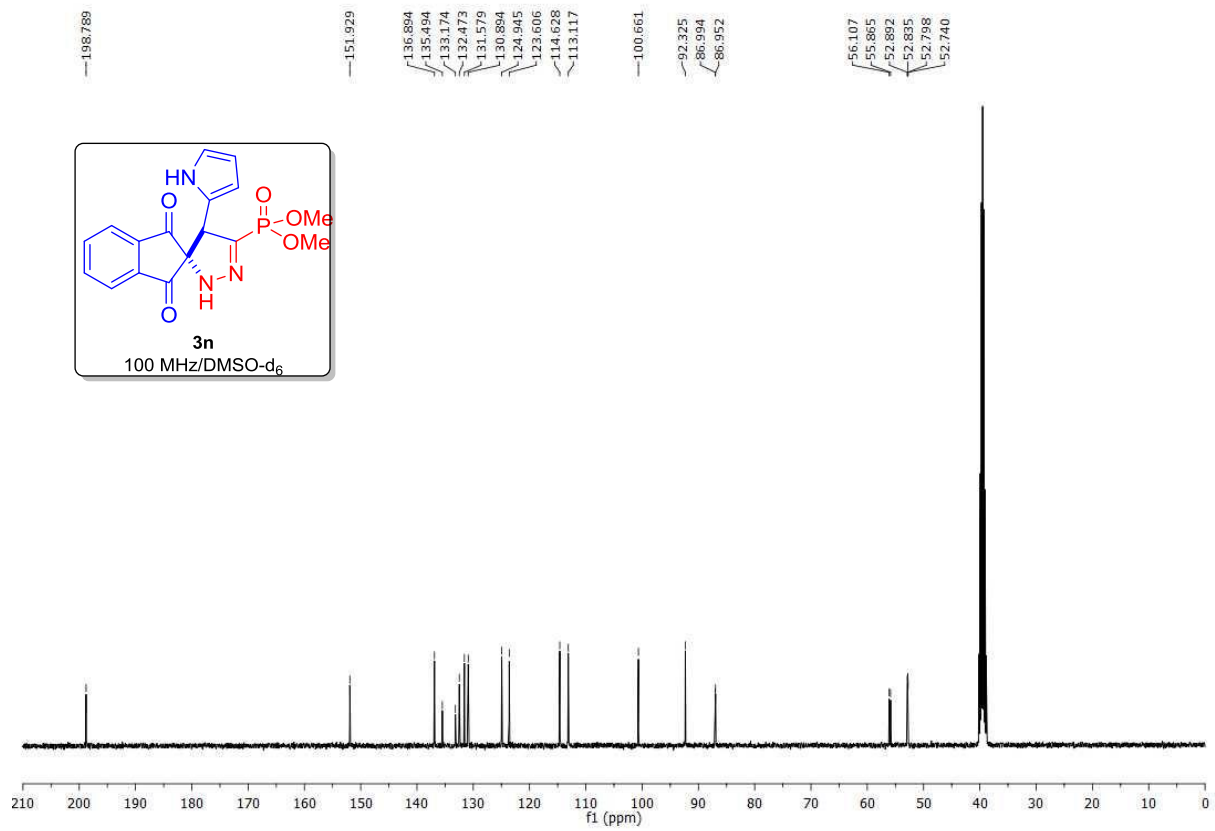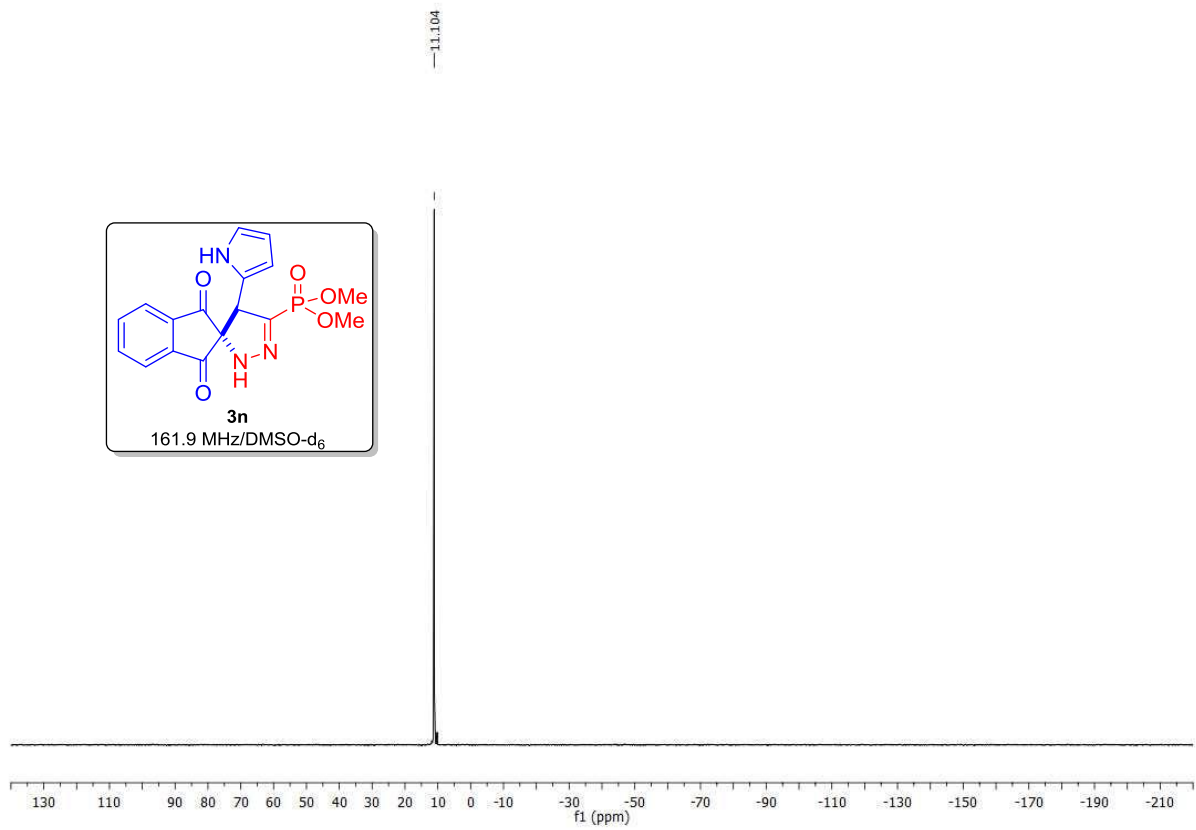

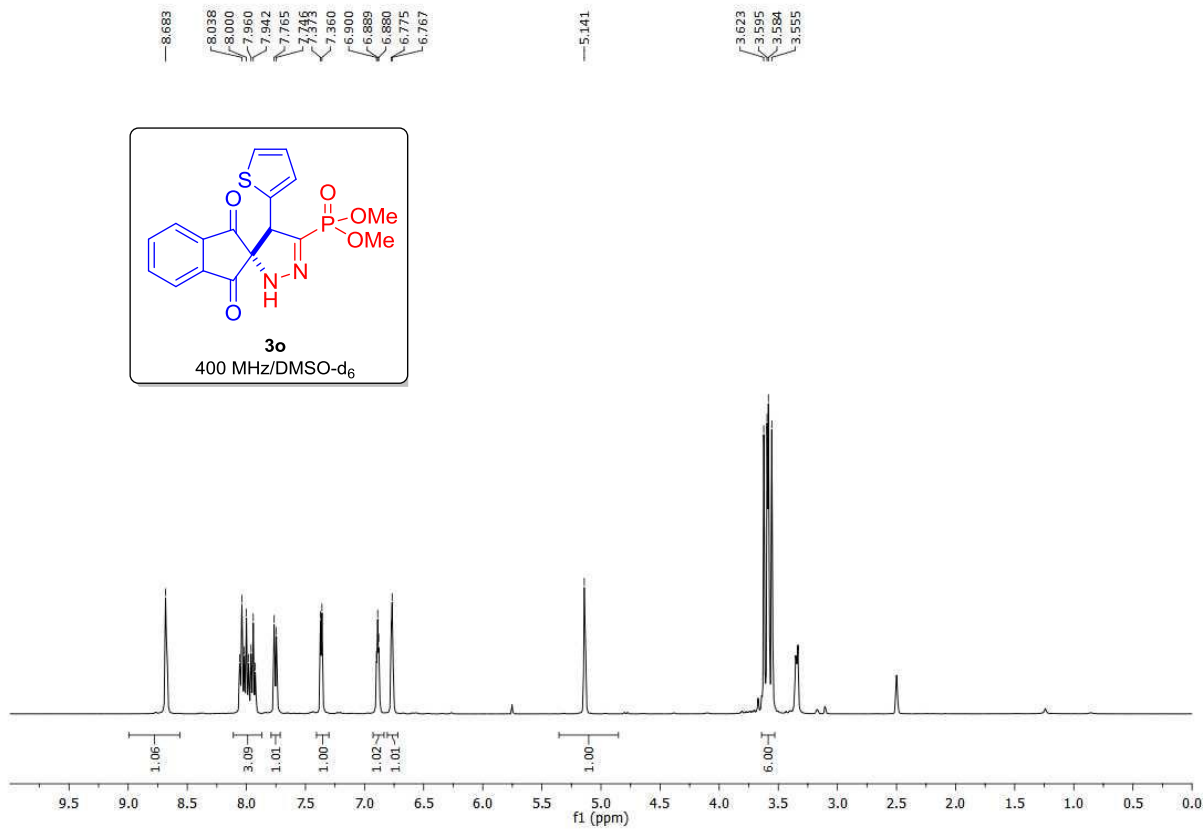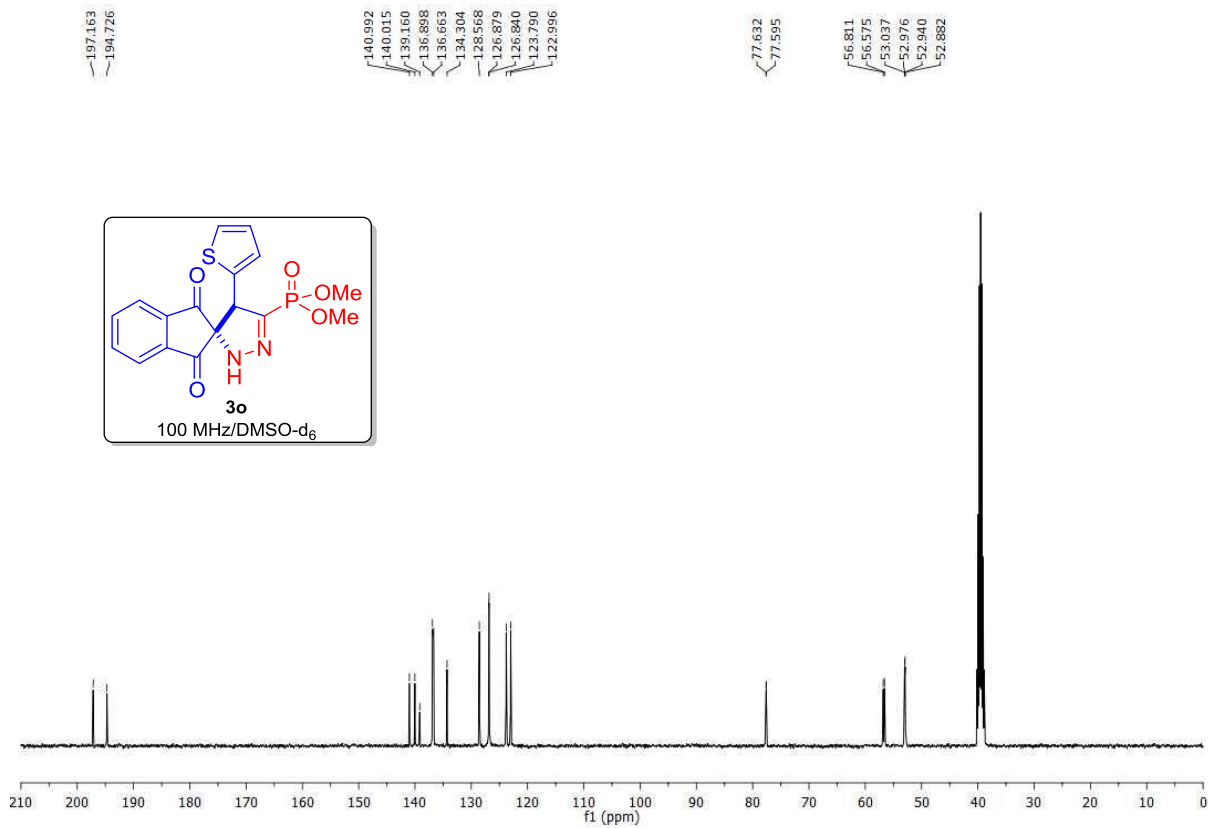

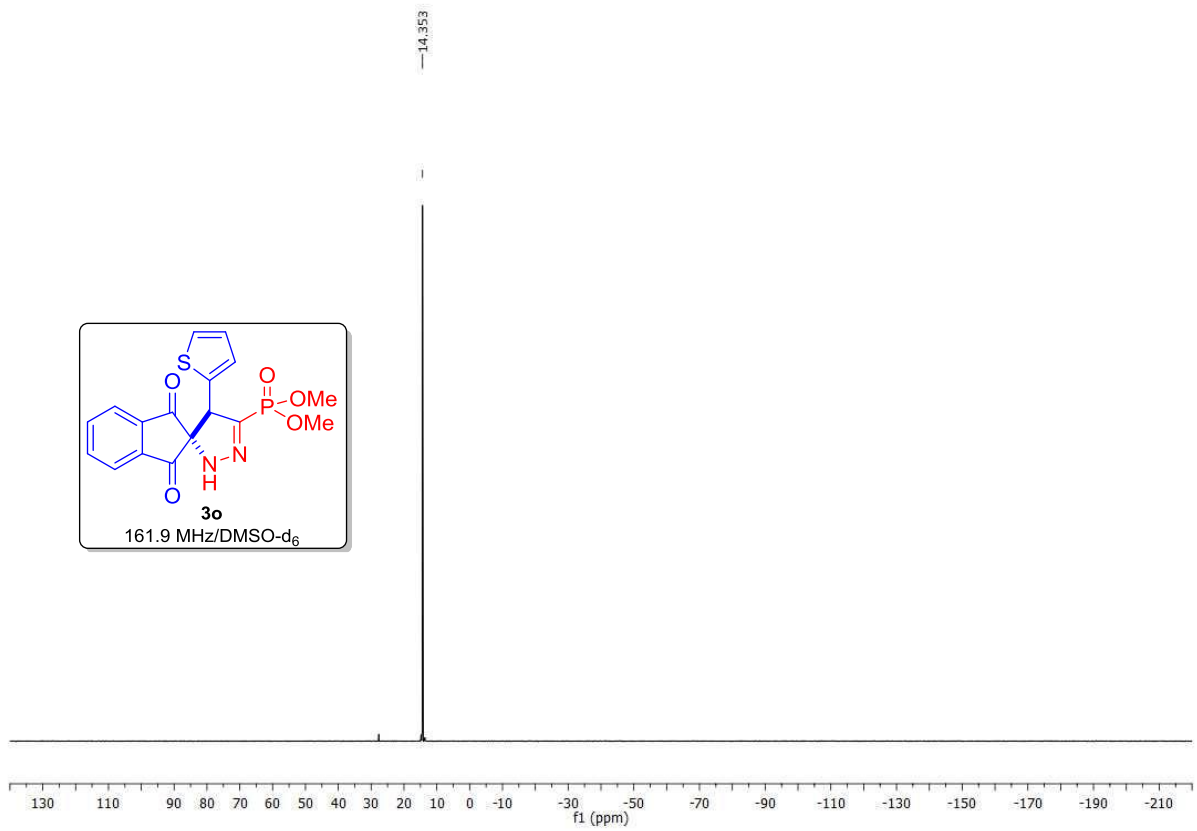

7.918  
7.859  
7.708  
7.688  
7.681  
7.678  
7.671  
7.662  
7.660  
7.650  
7.510  
7.508  
7.497  
7.479  
7.459  
7.426  
7.423  
7.408  
7.358  
7.337  
7.260  
7.242  
7.234  
7.215  
7.087  
5.933

3.705  
3.677  
3.628  
3.600

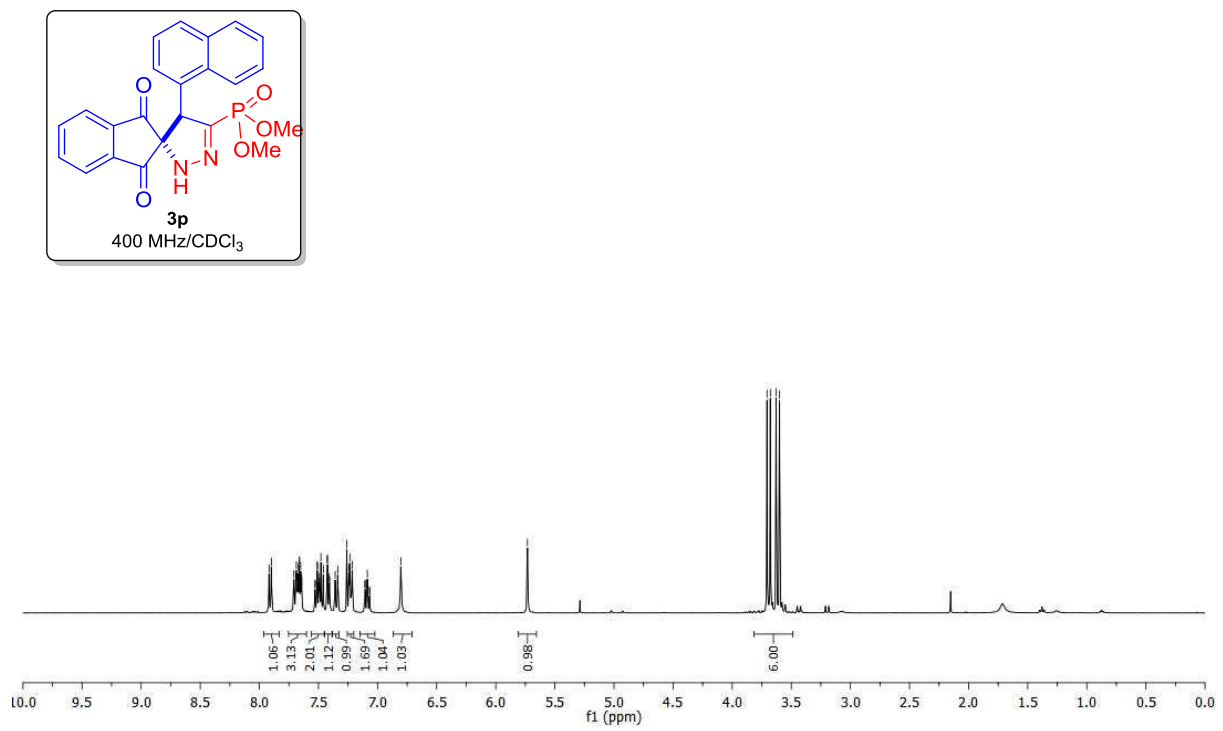

1.06  
3.13  
2.01  
1.12  
0.99  
1.69  
1.04  
1.03

0.98

6.00

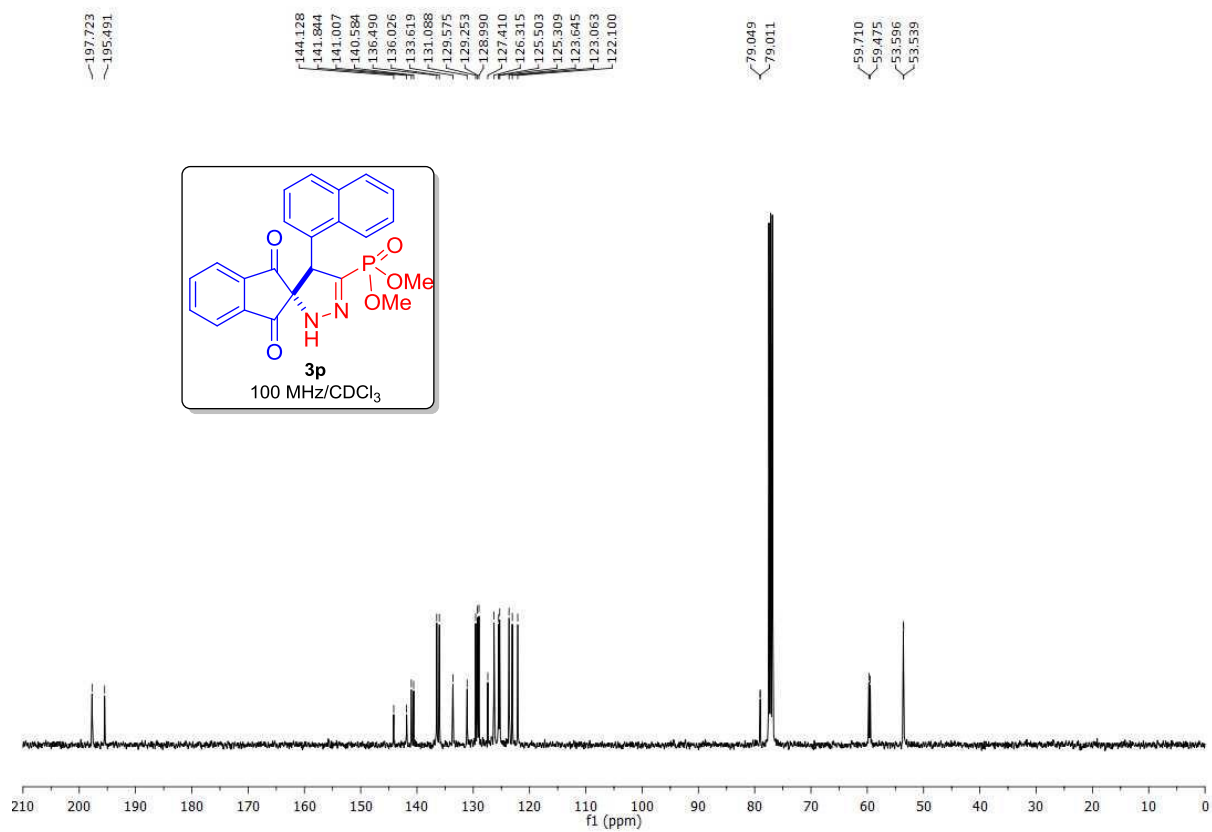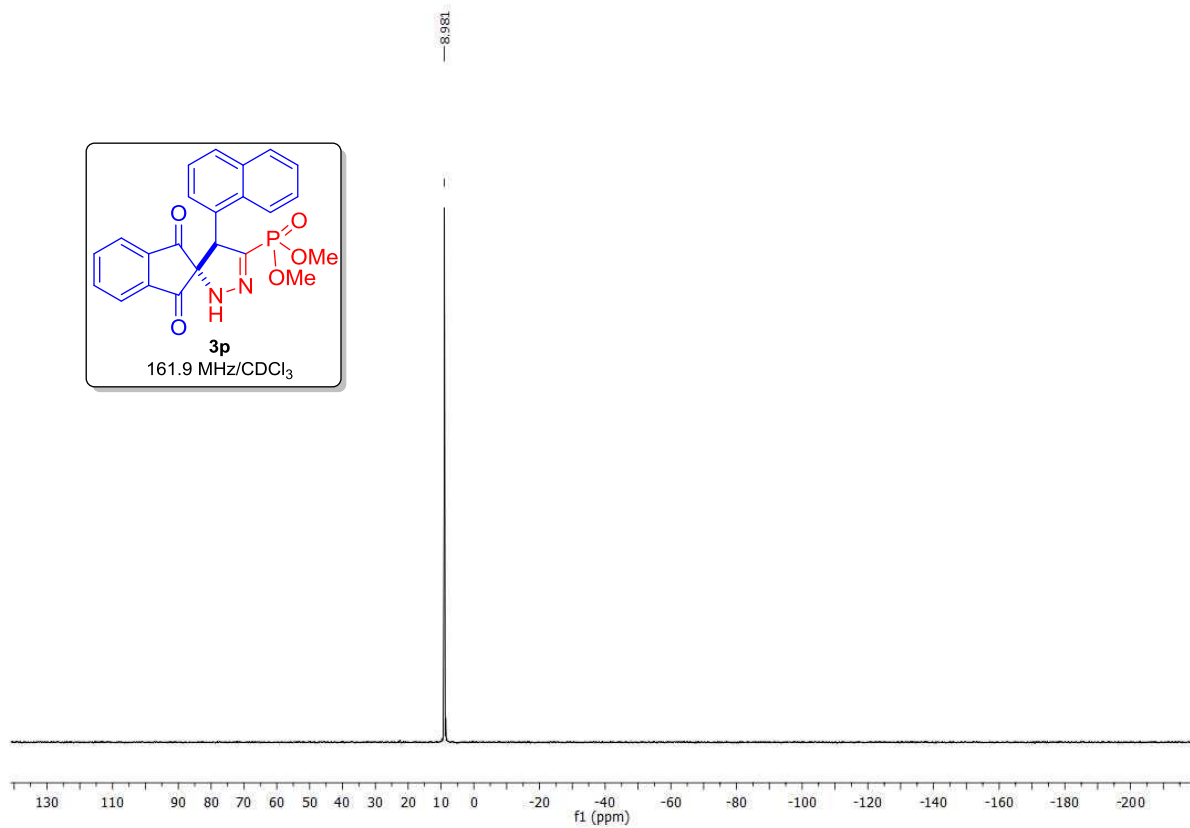

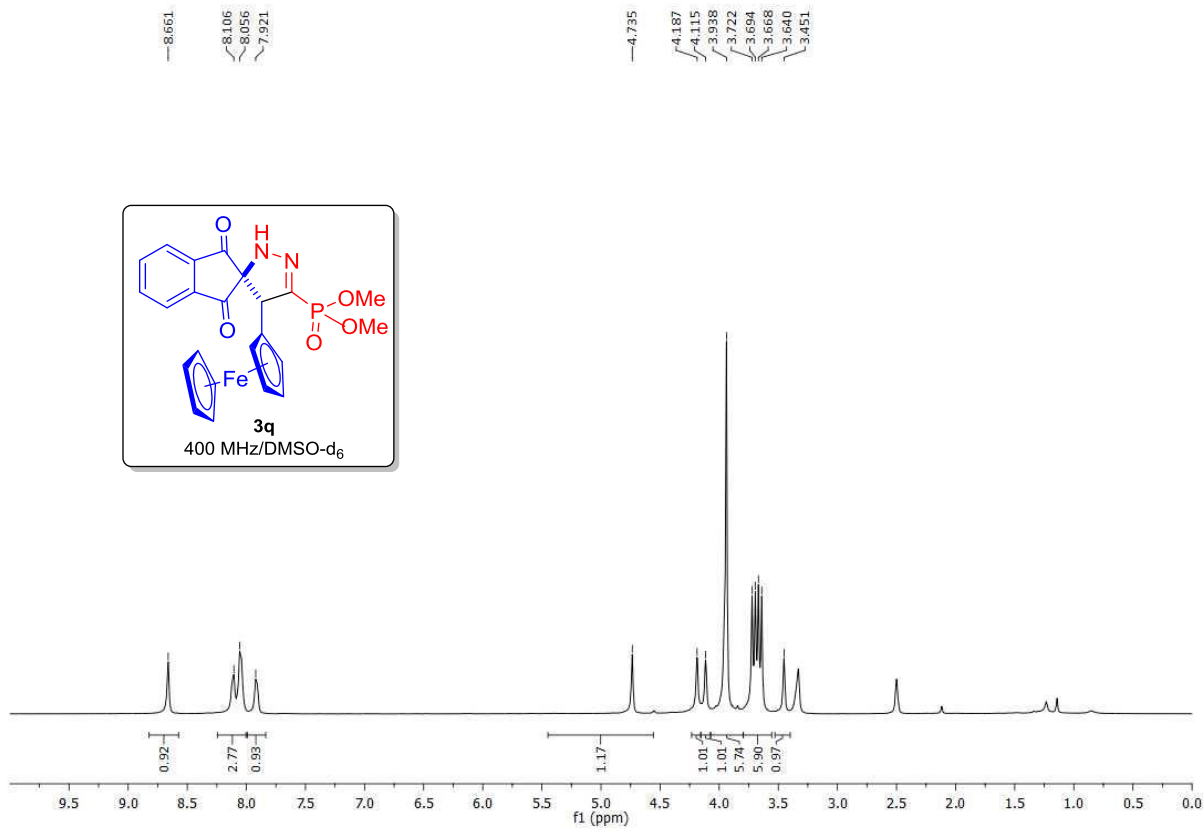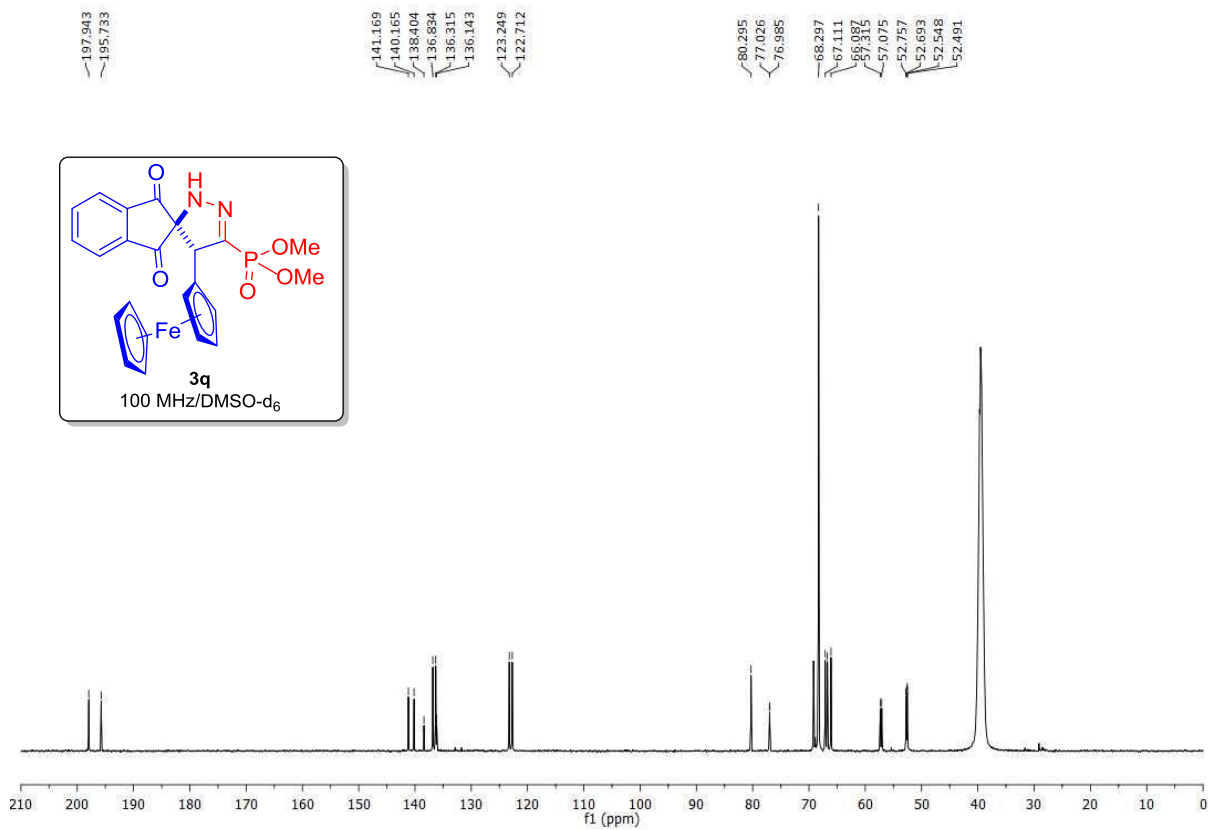

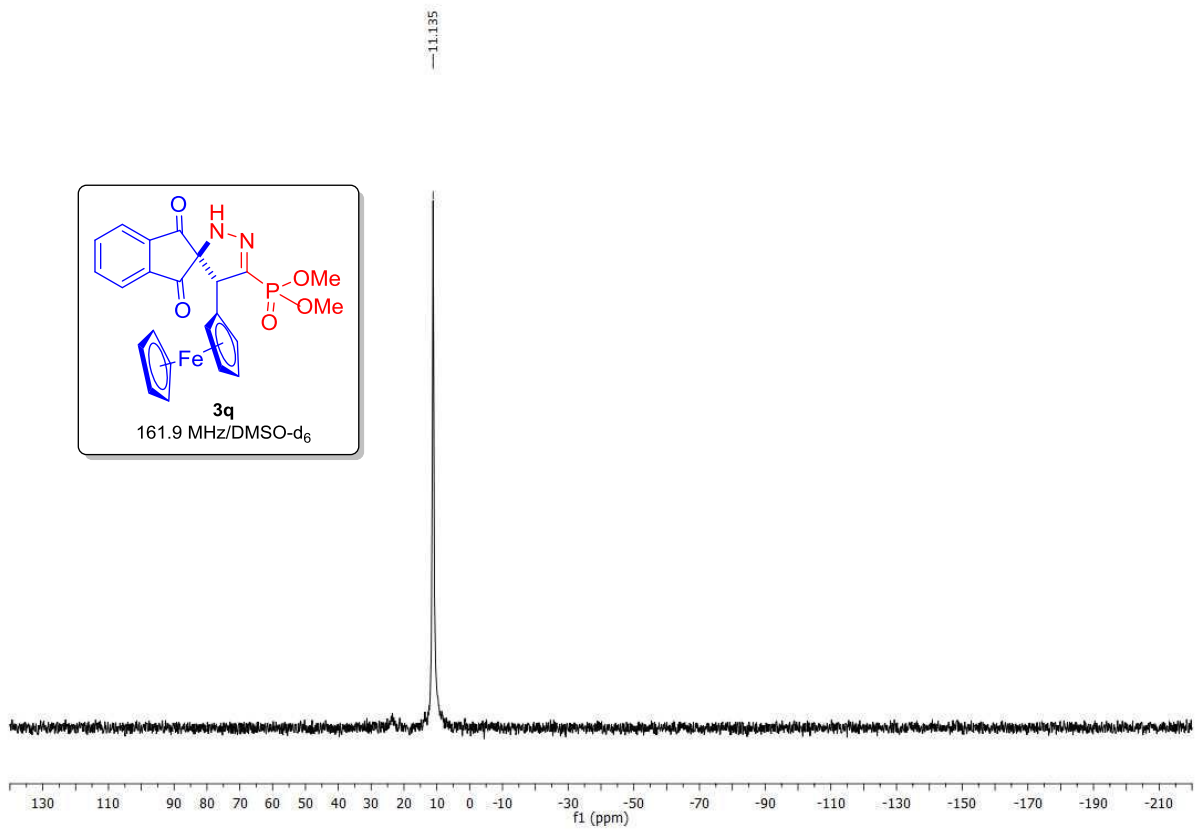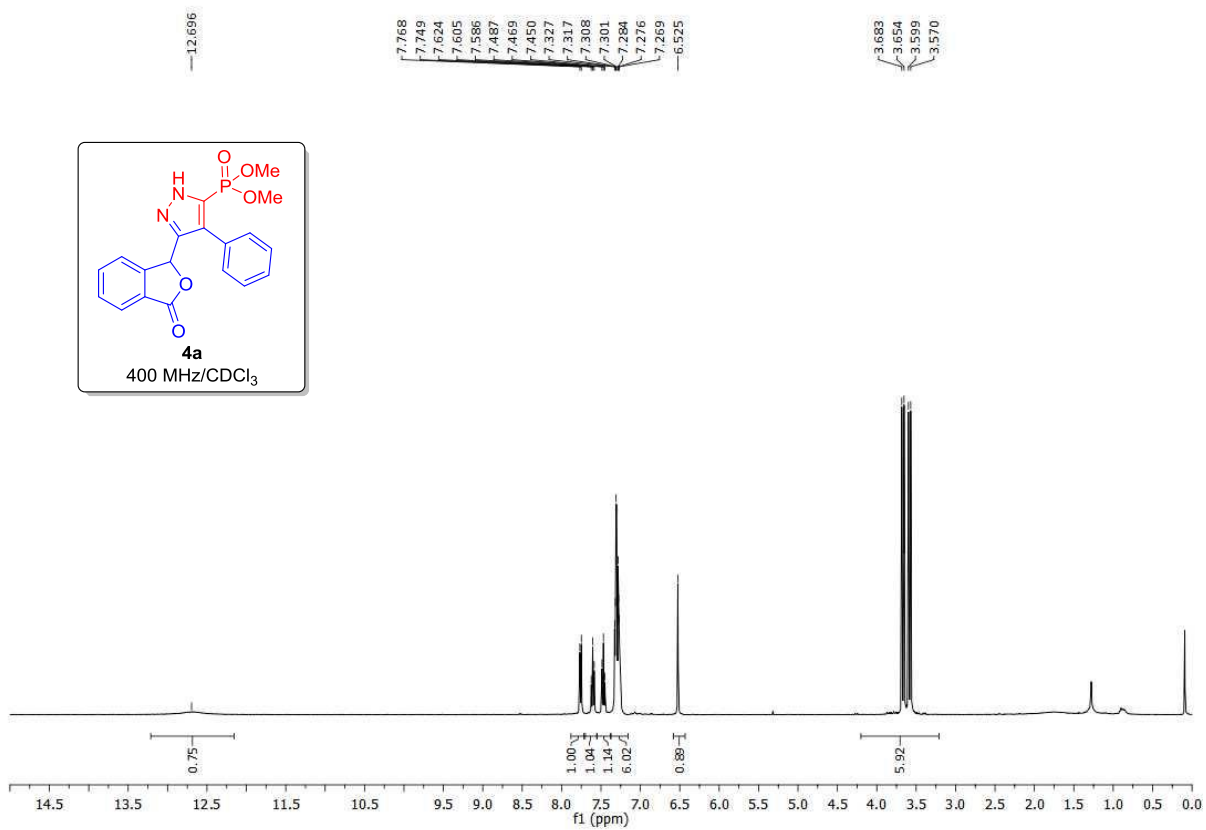

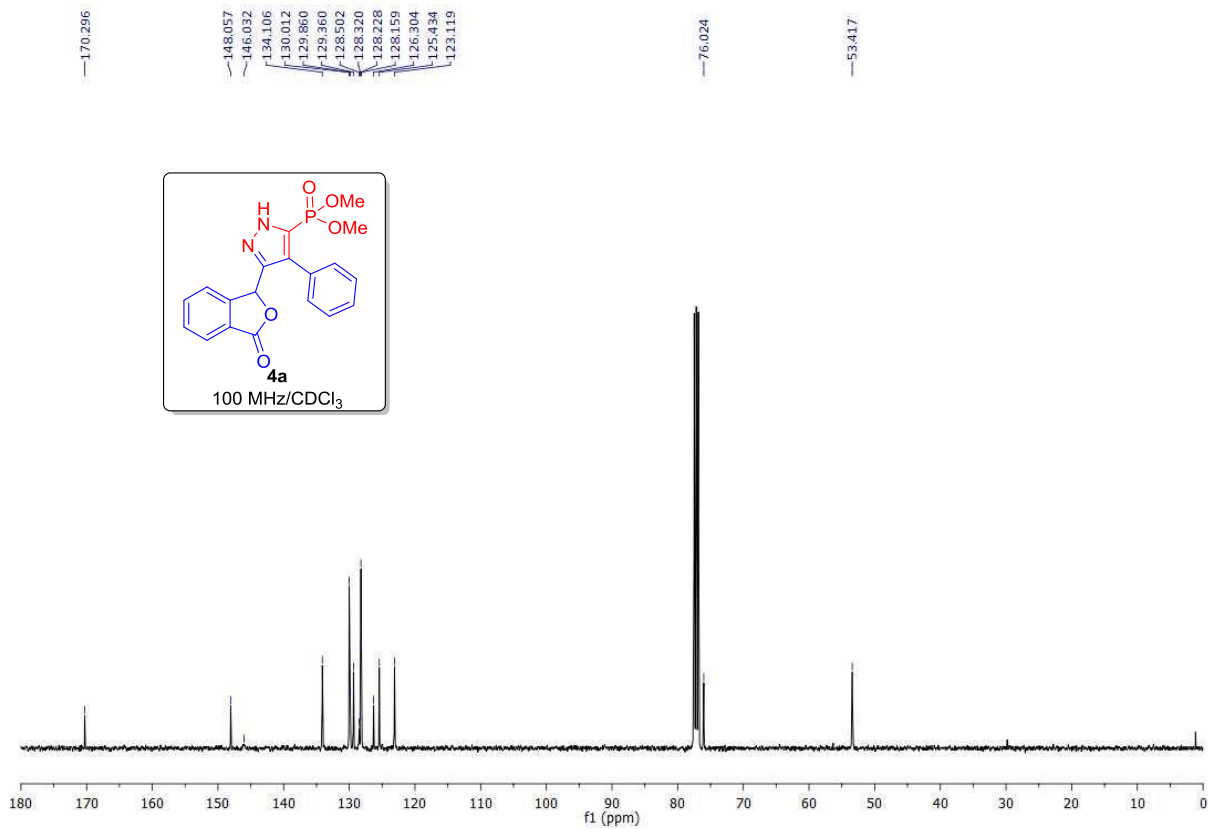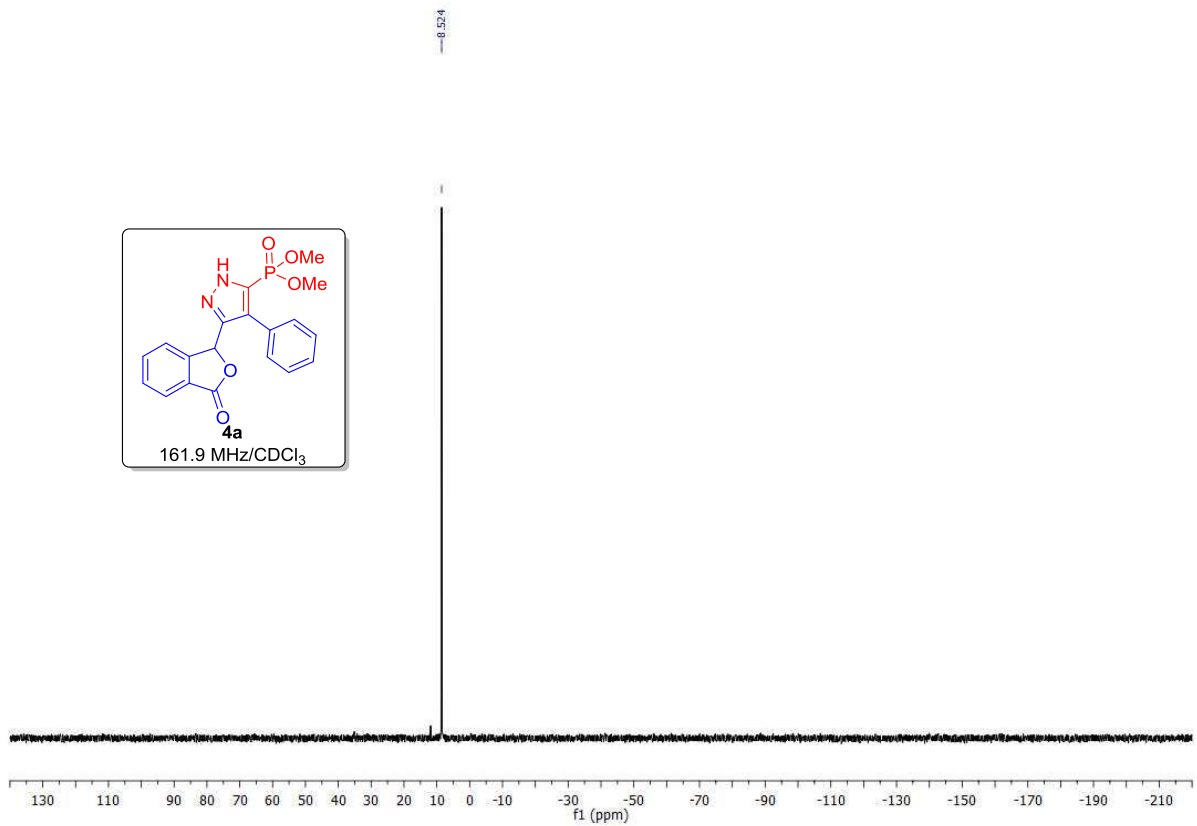



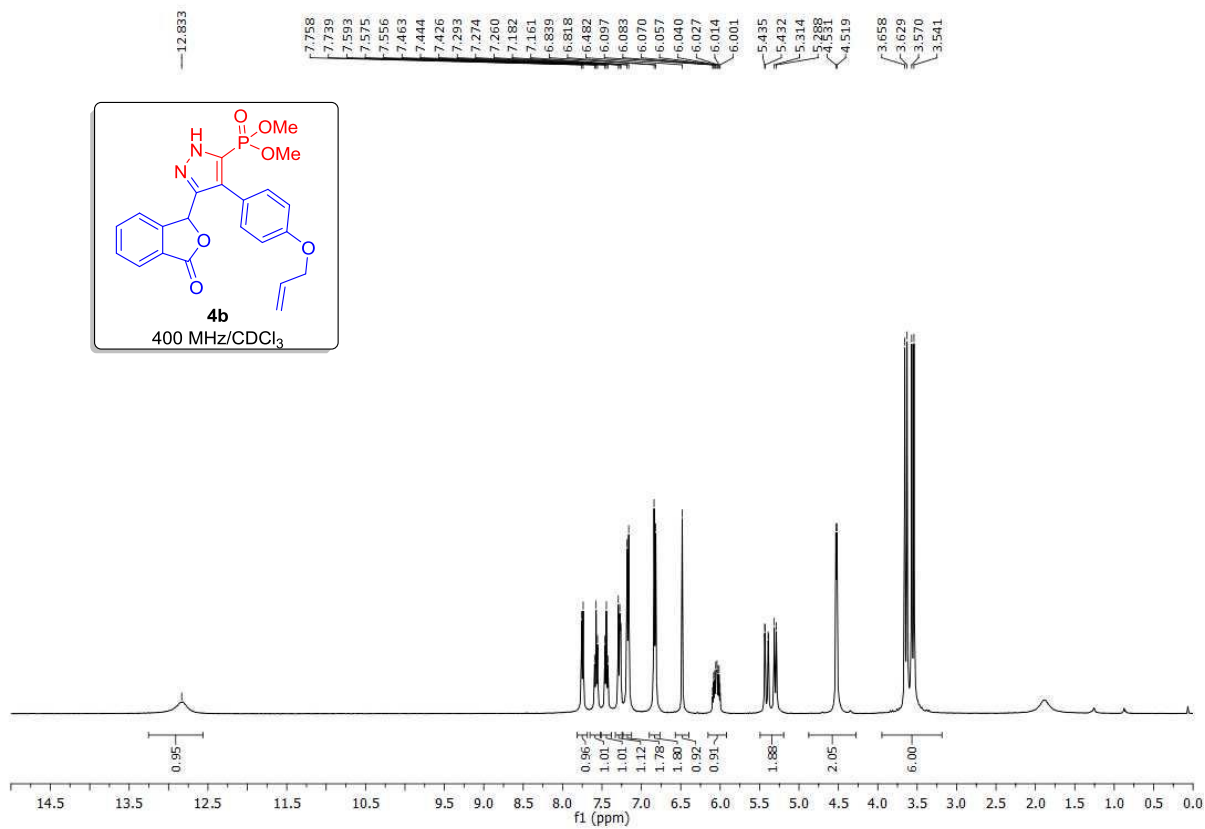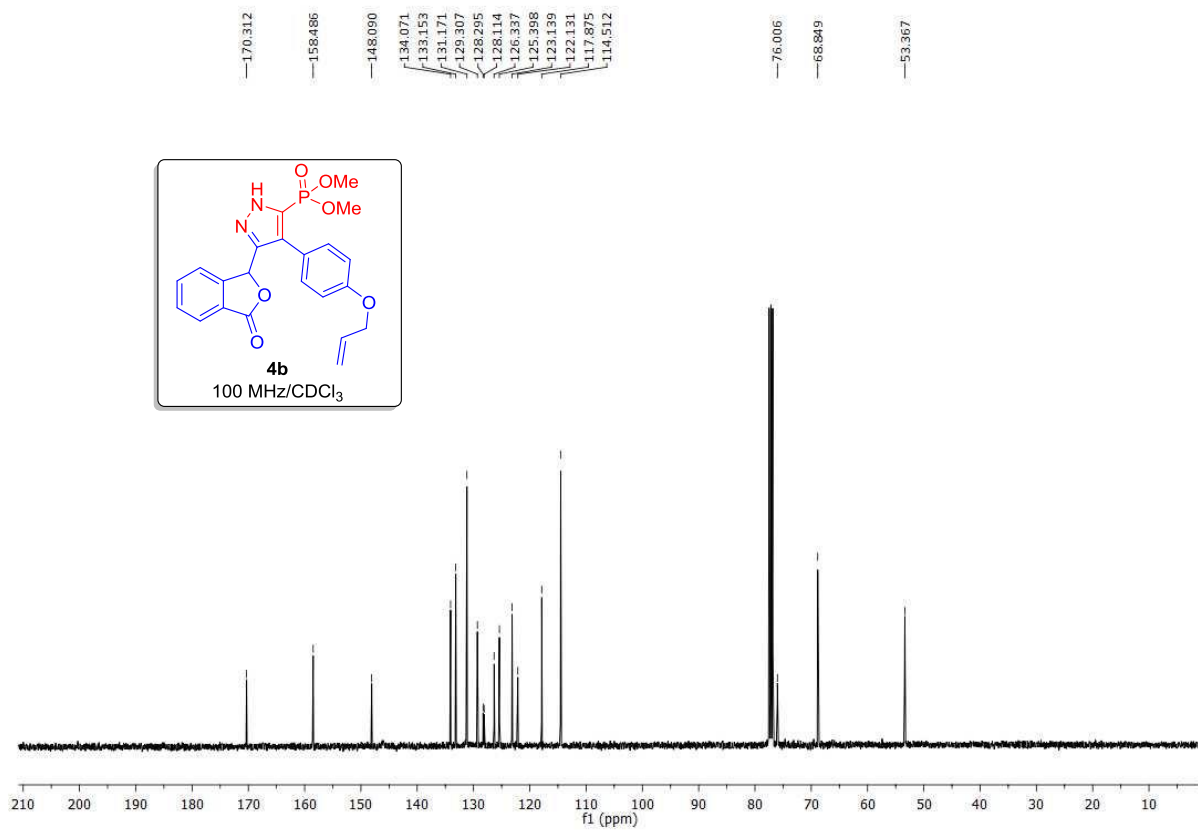

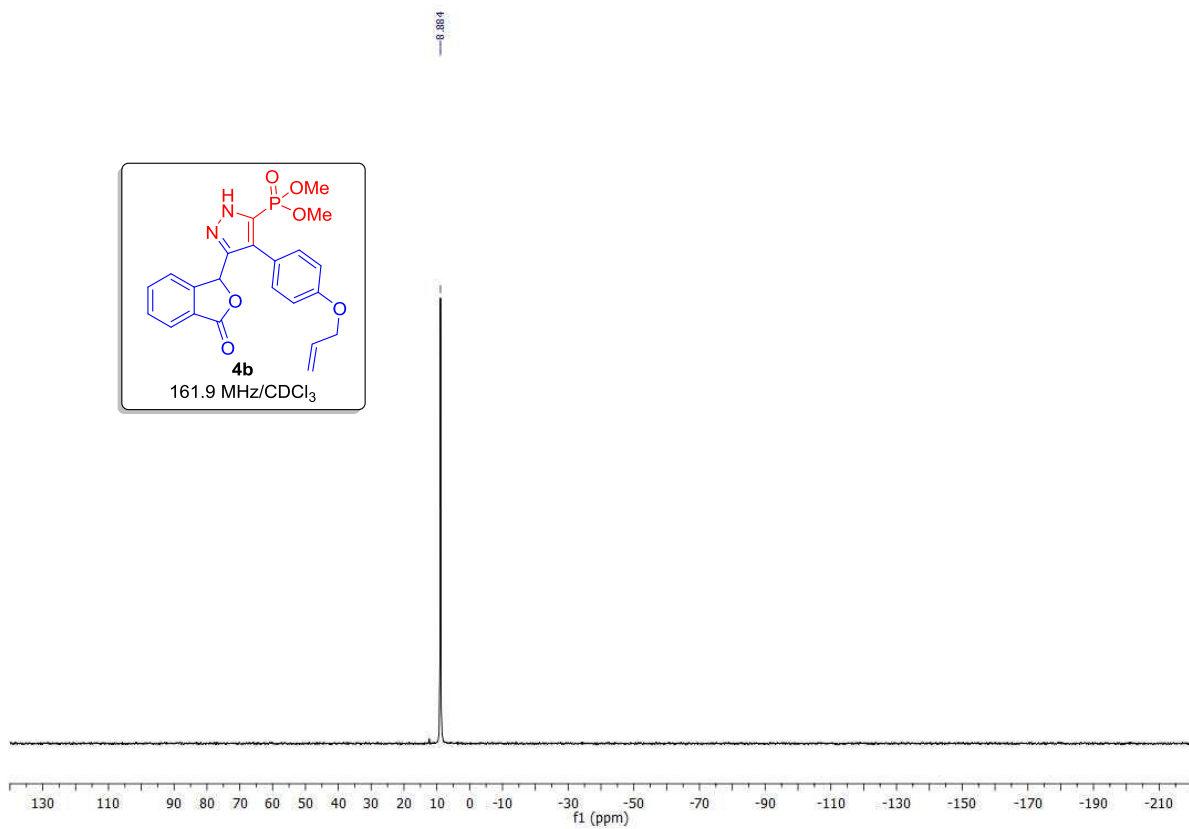

7.773  
7.754  
7.612  
7.594  
7.575  
7.481  
7.462  
7.444  
7.315  
7.296  
7.289  
7.212  
7.191  
6.848  
6.826  
6.506

3.818  
3.680  
3.651  
3.590  
3.561

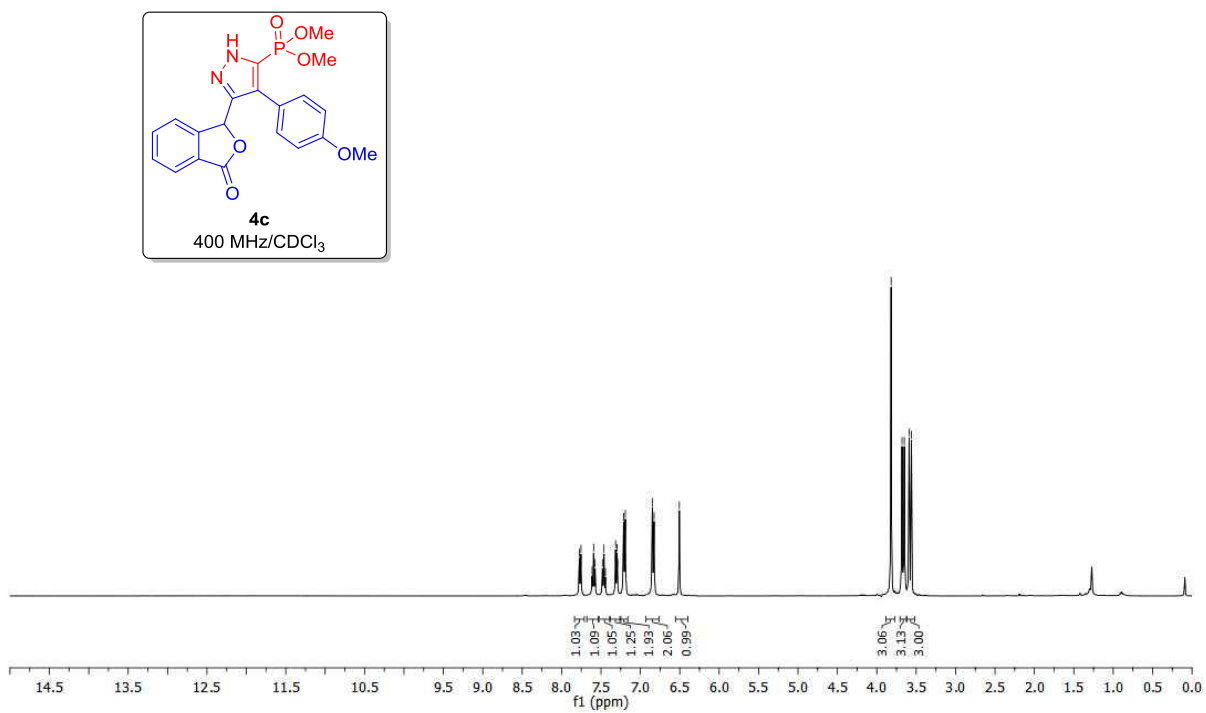

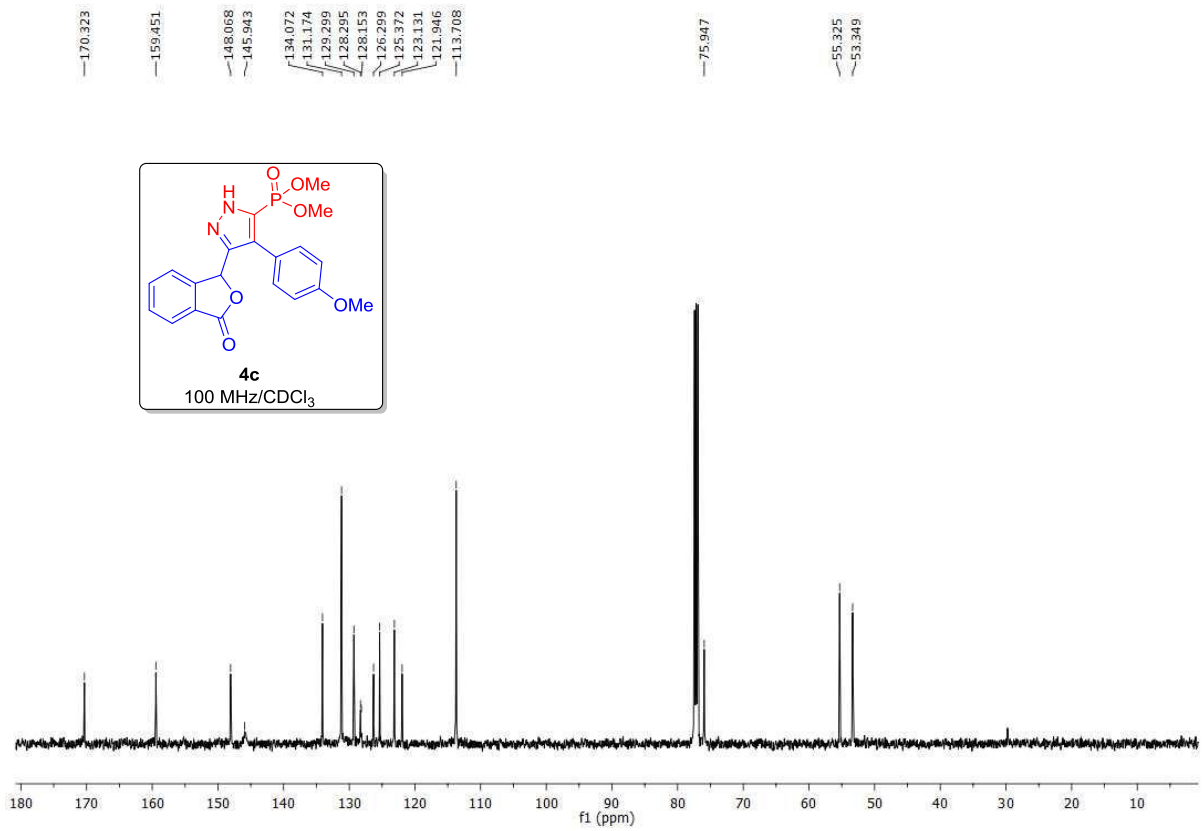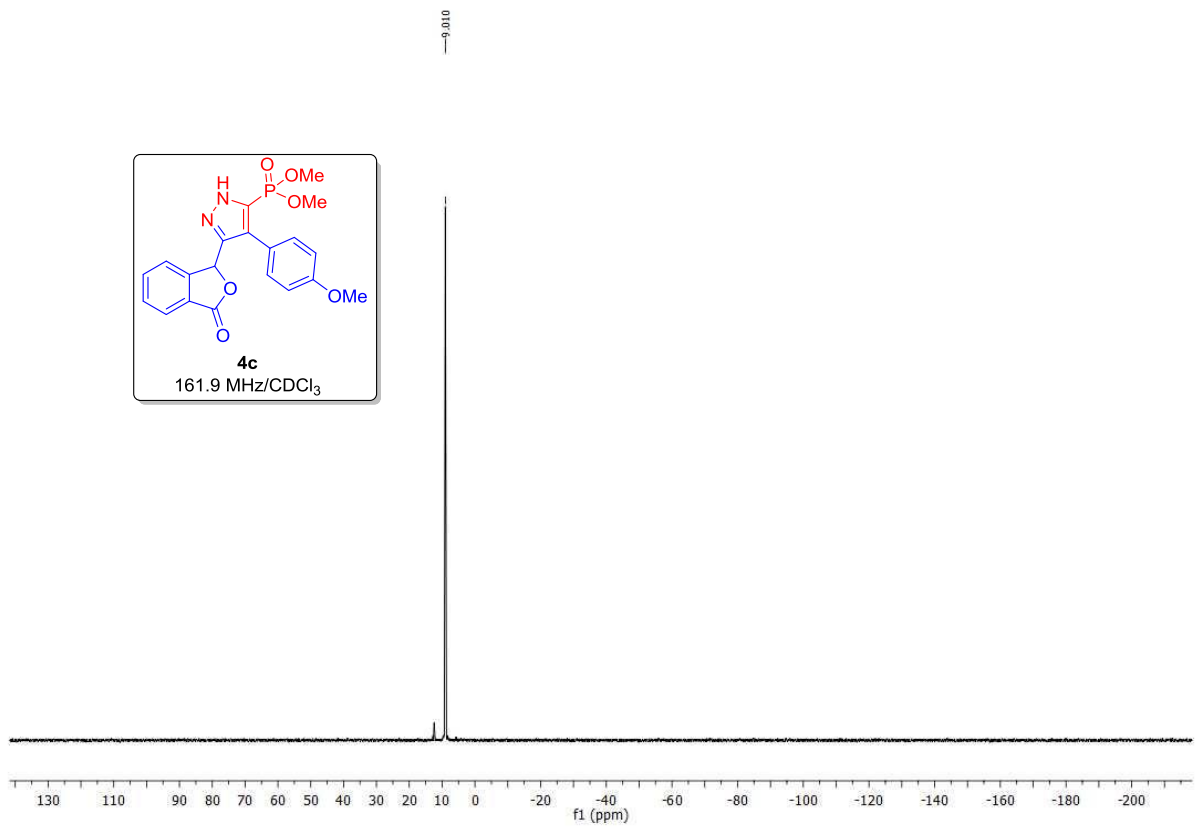

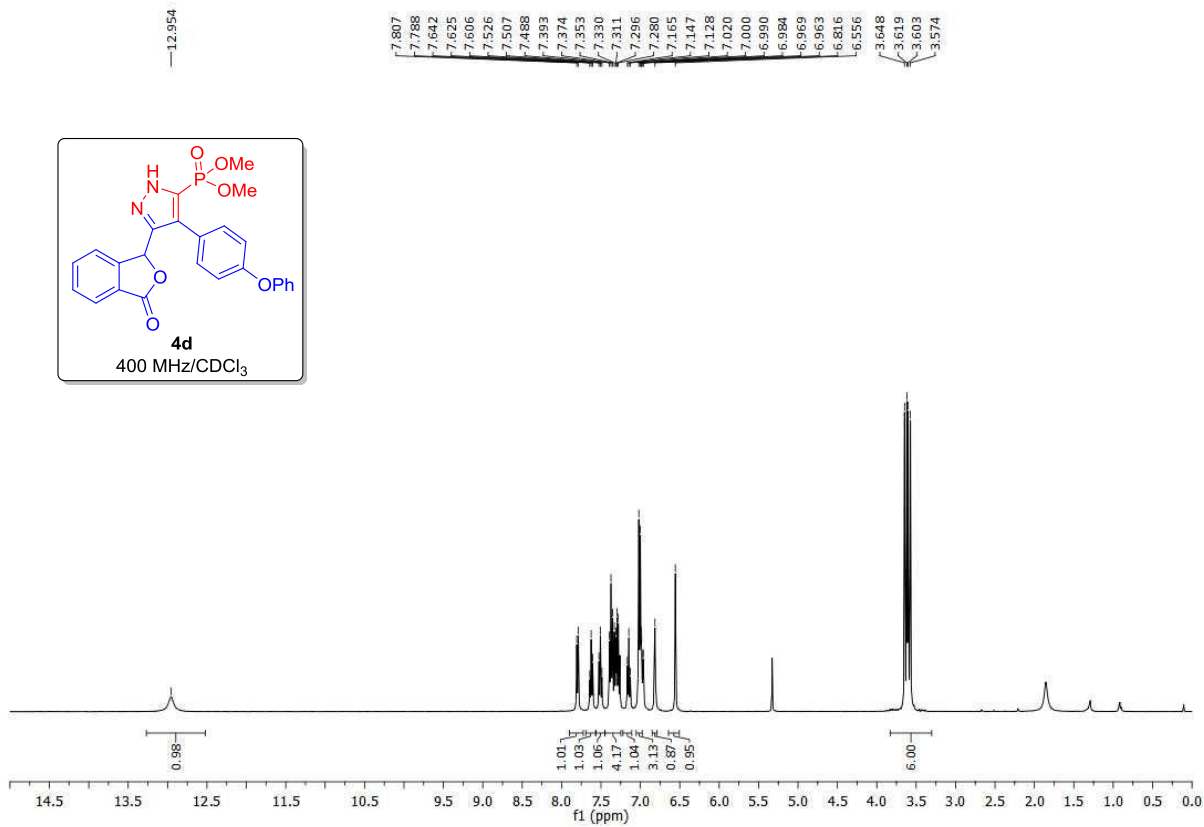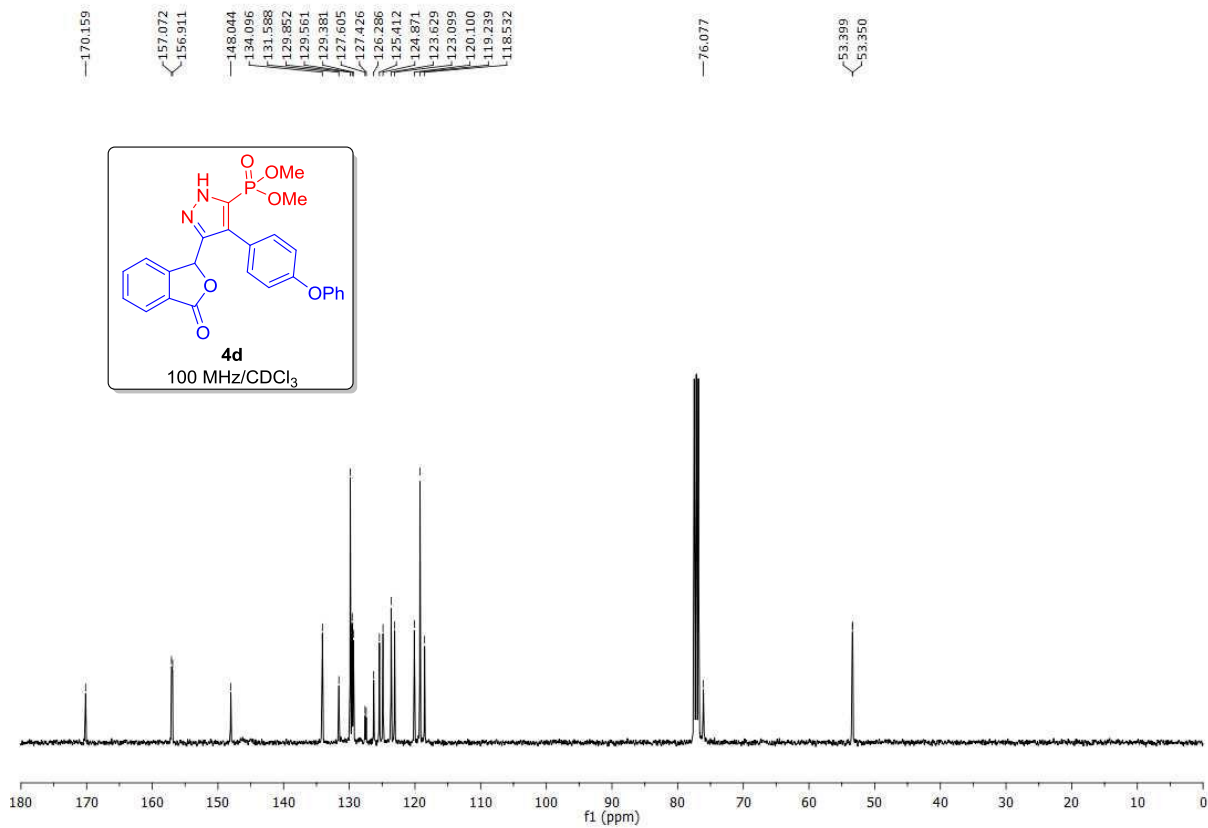

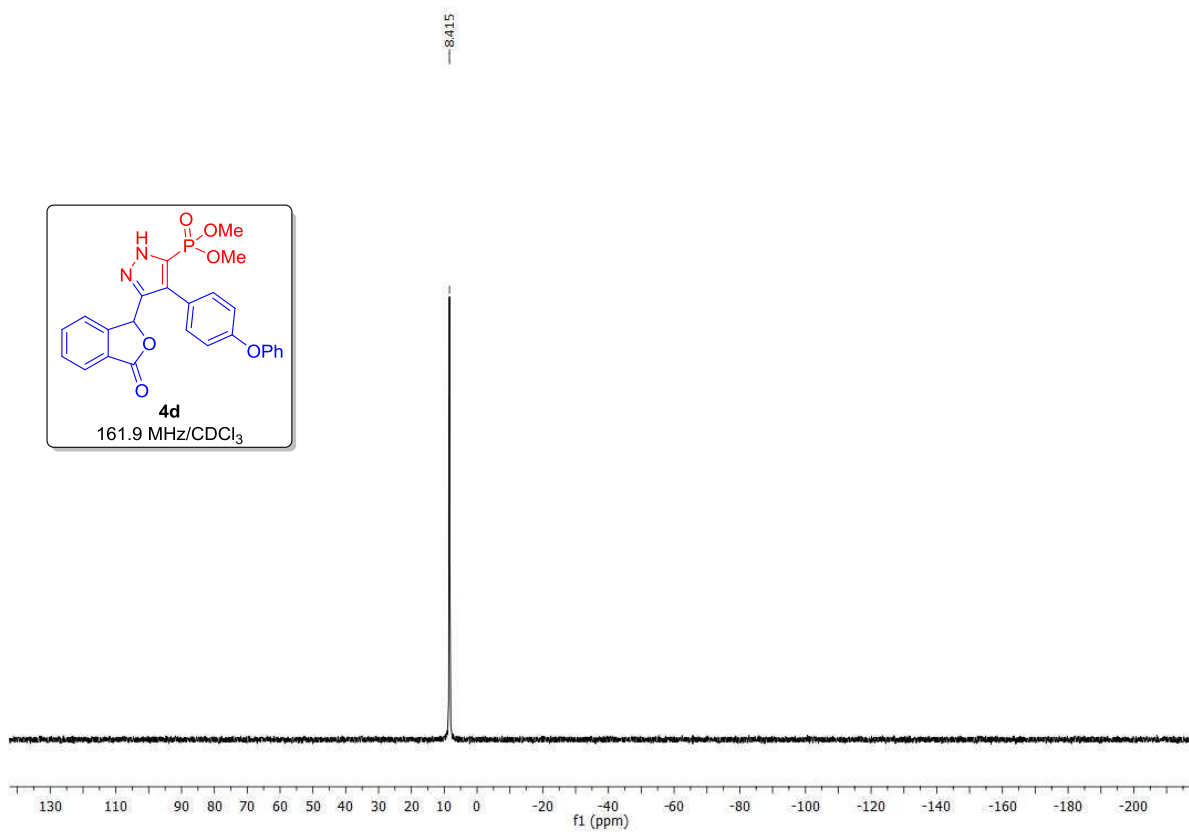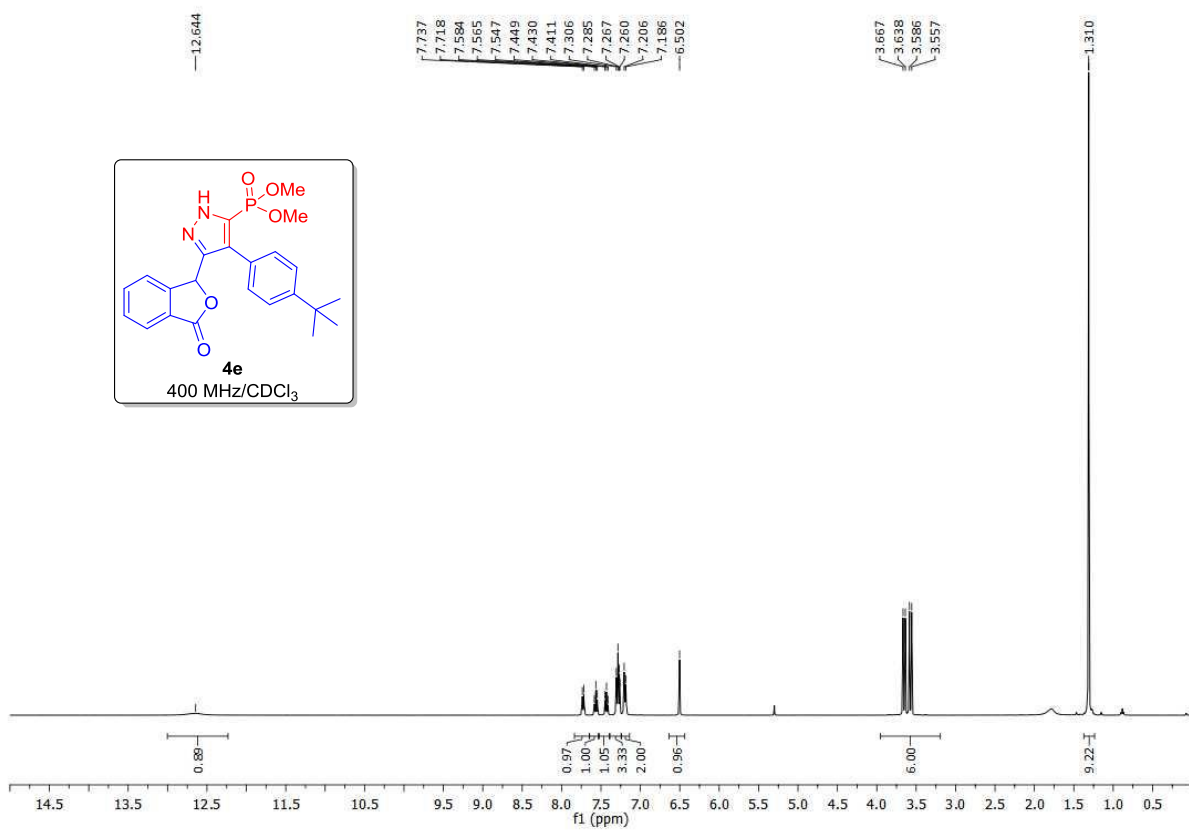

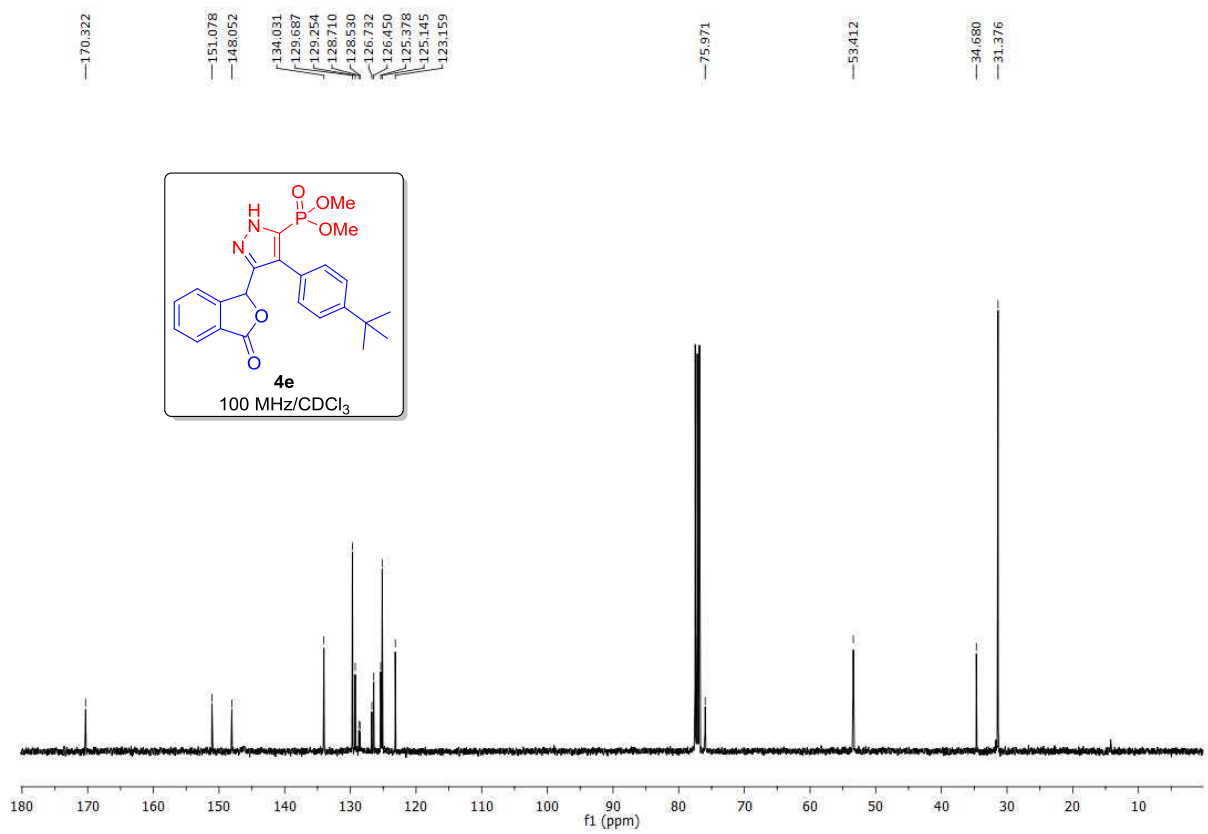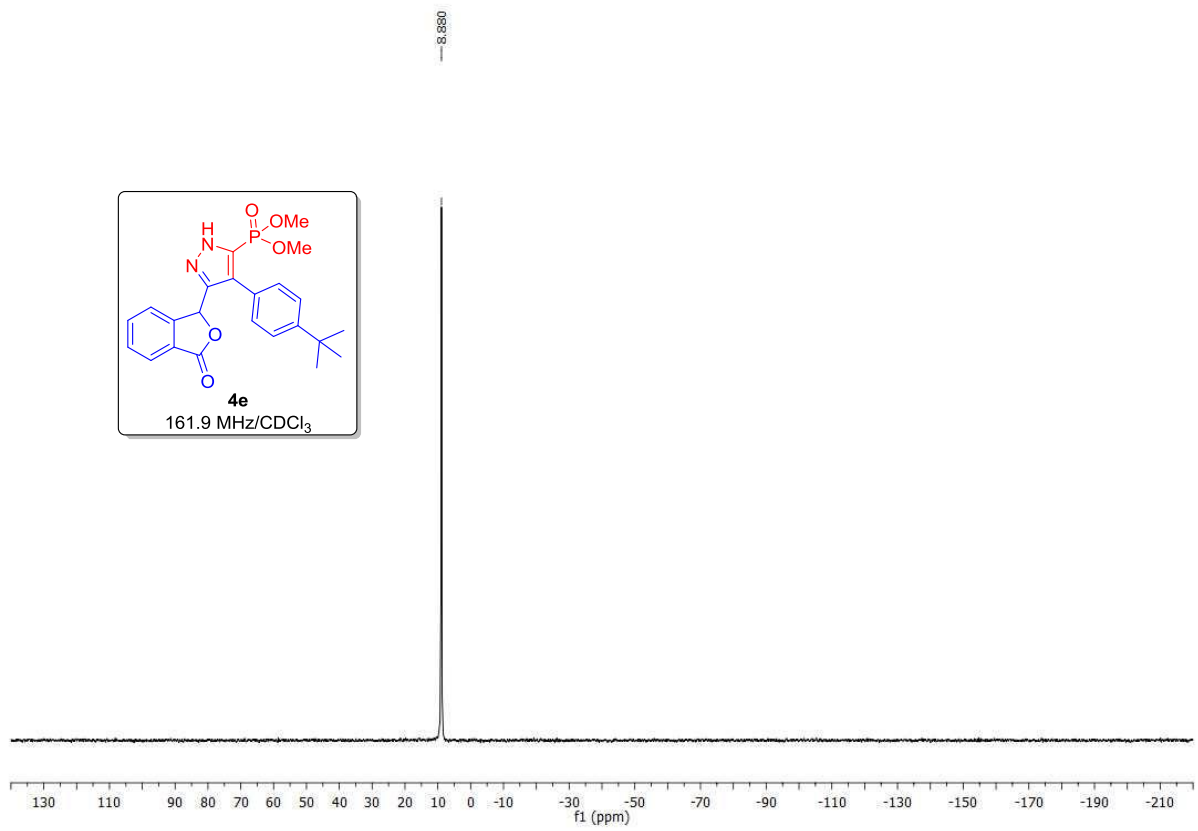

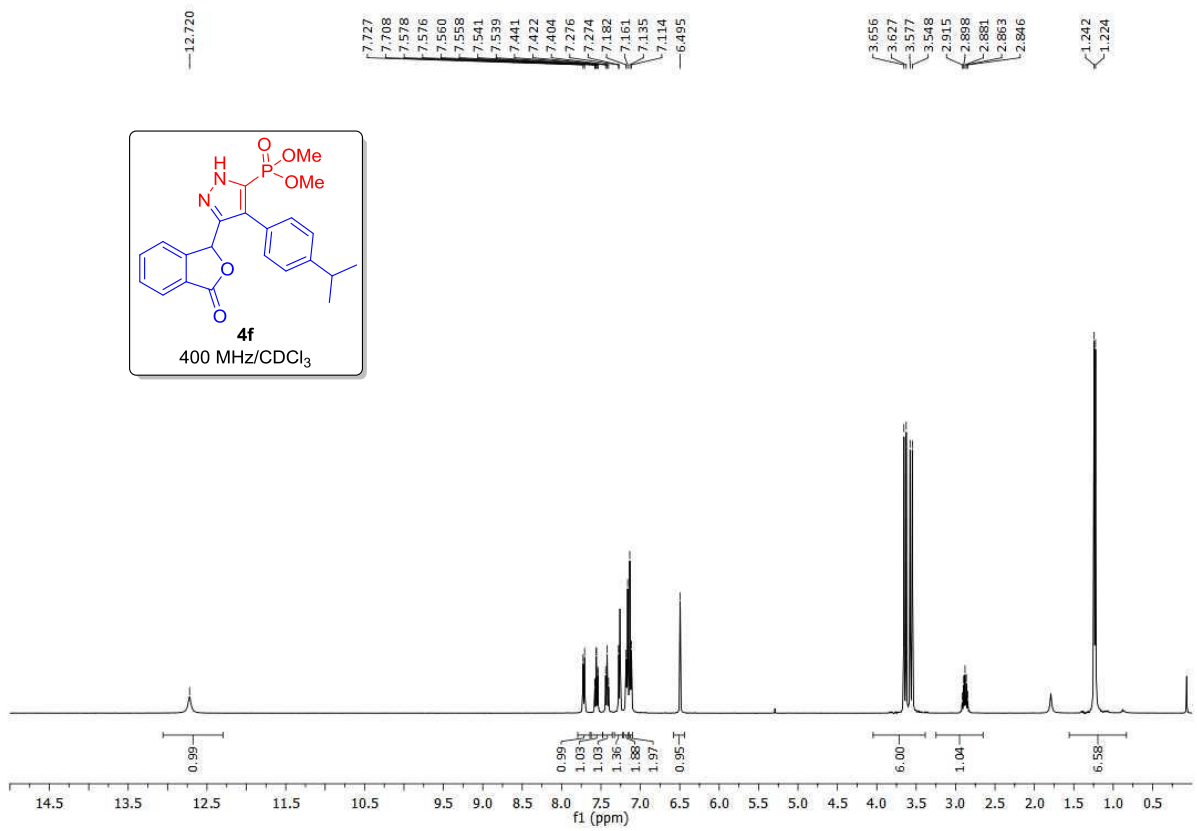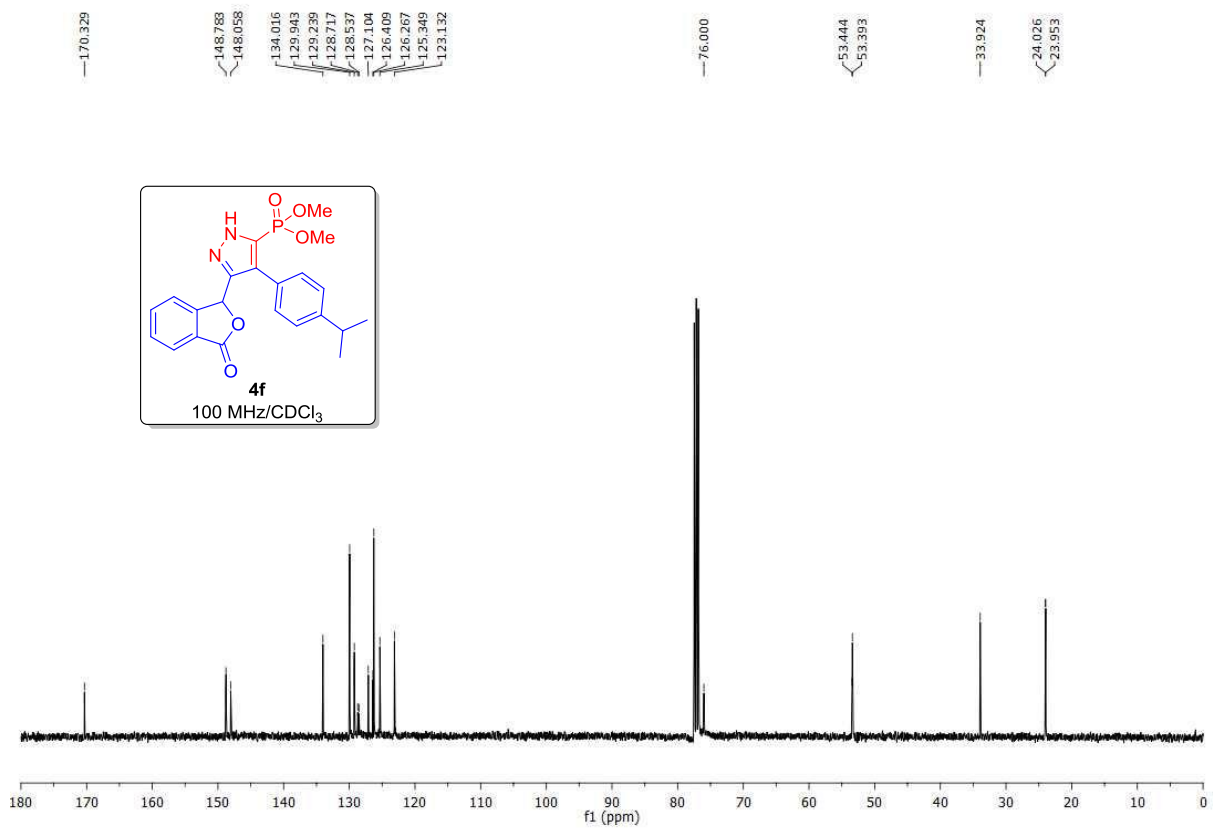

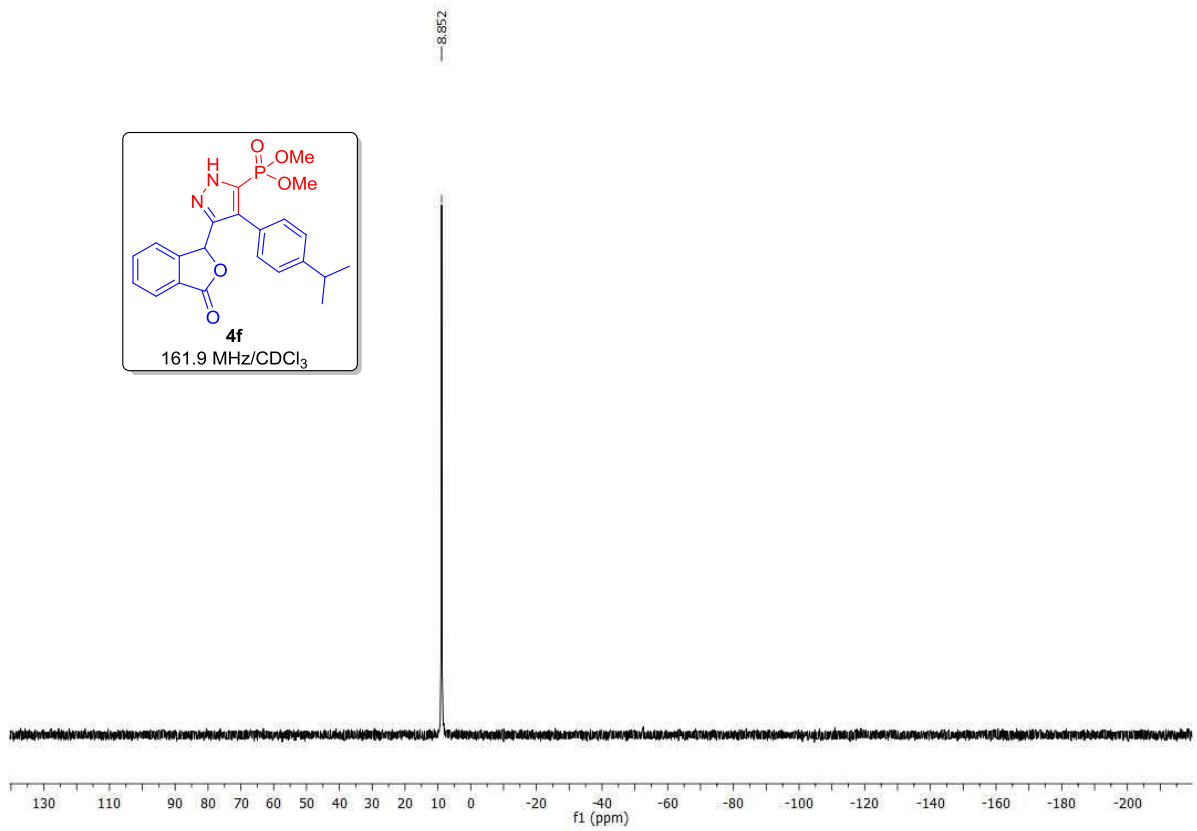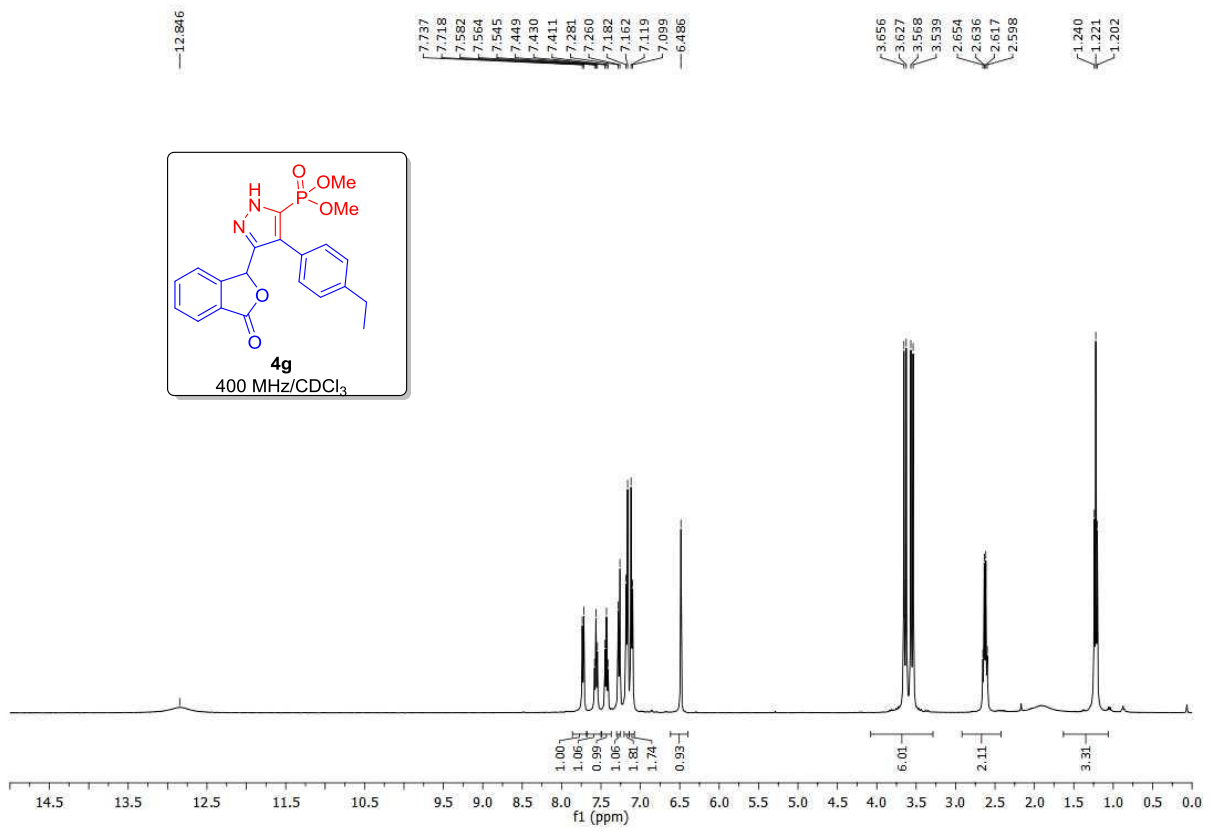



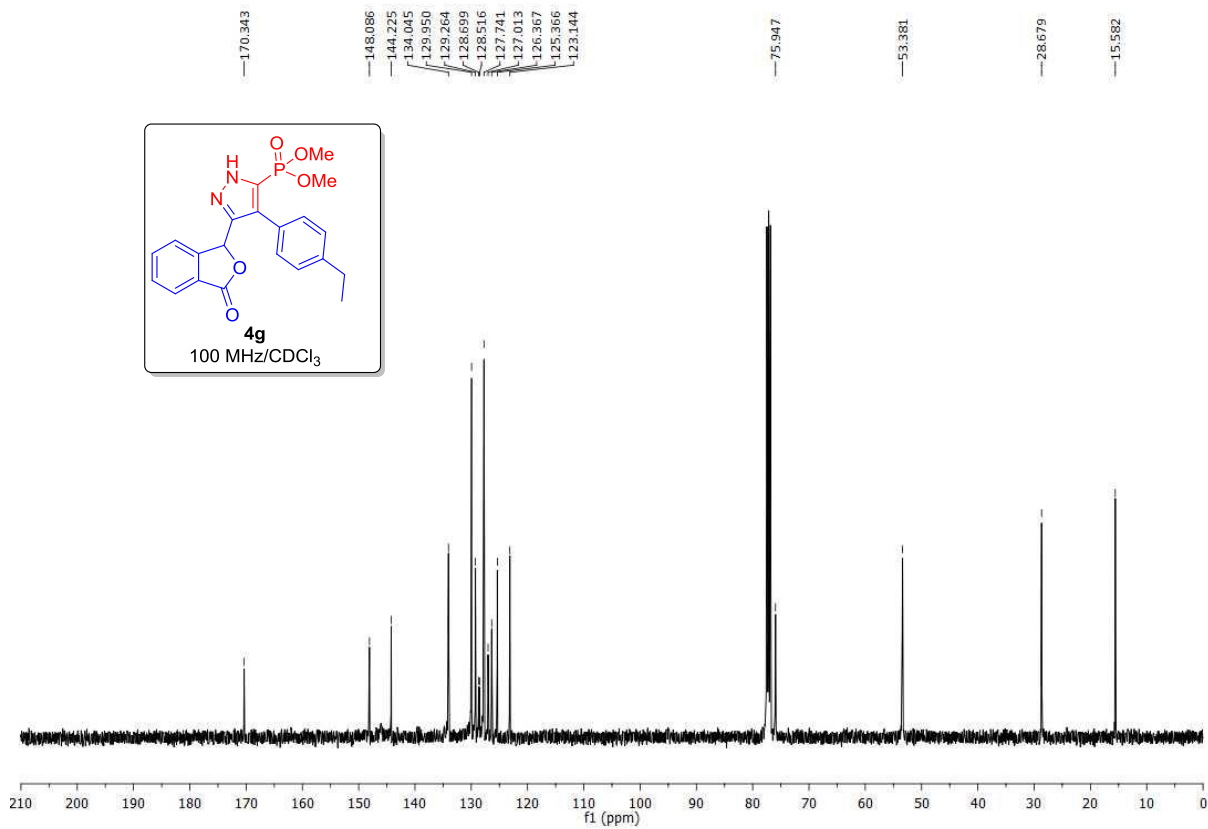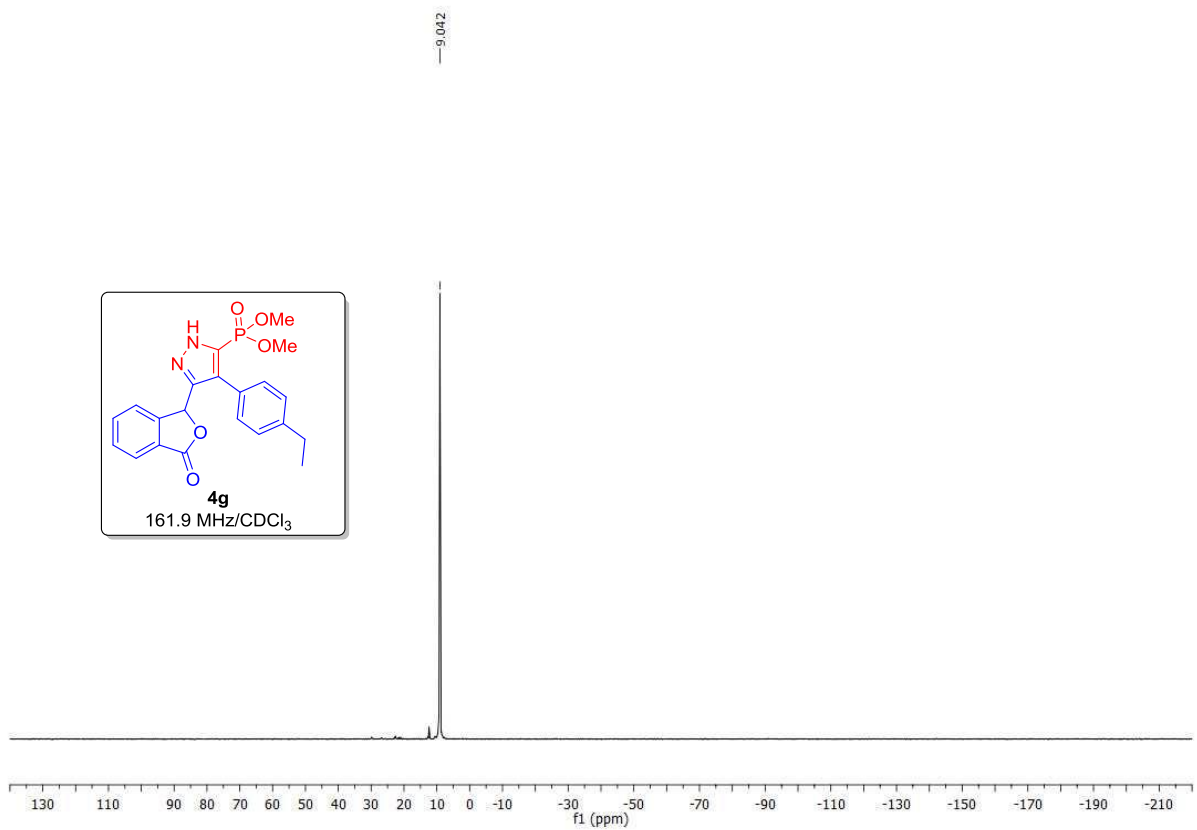

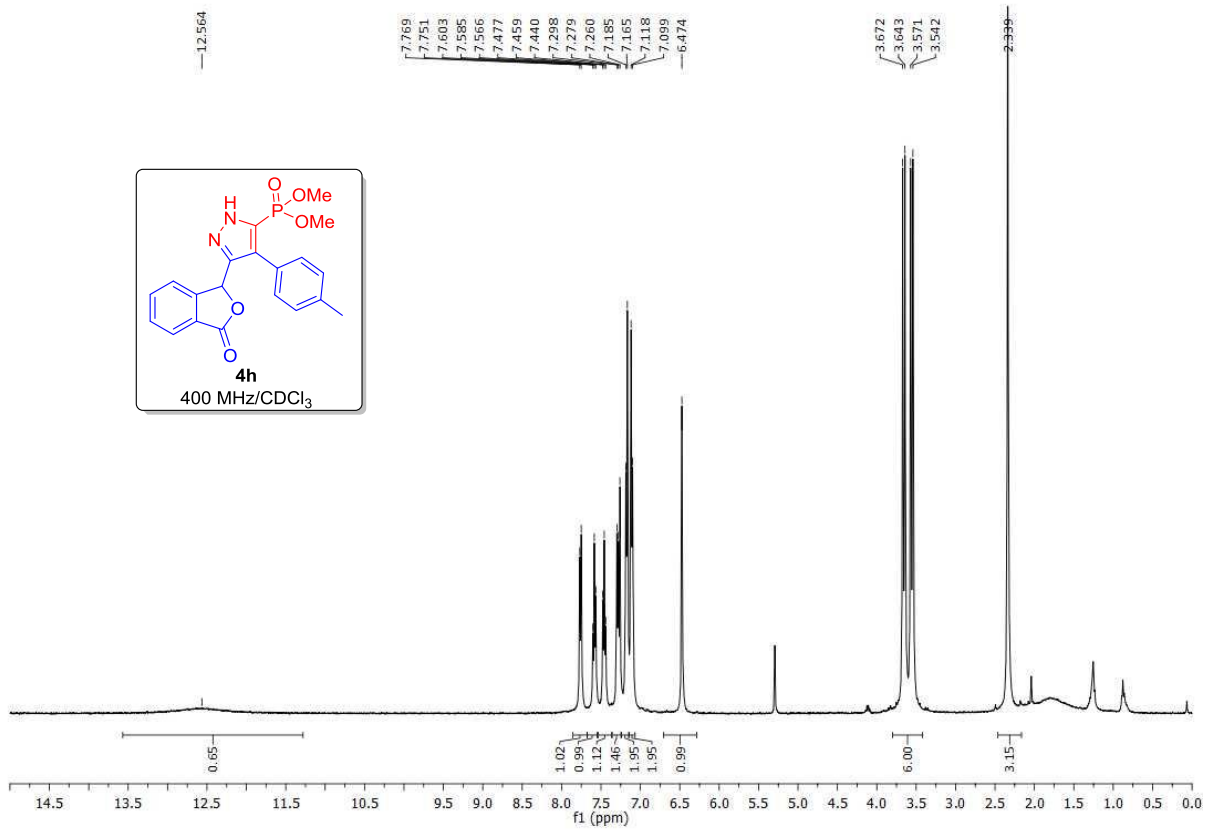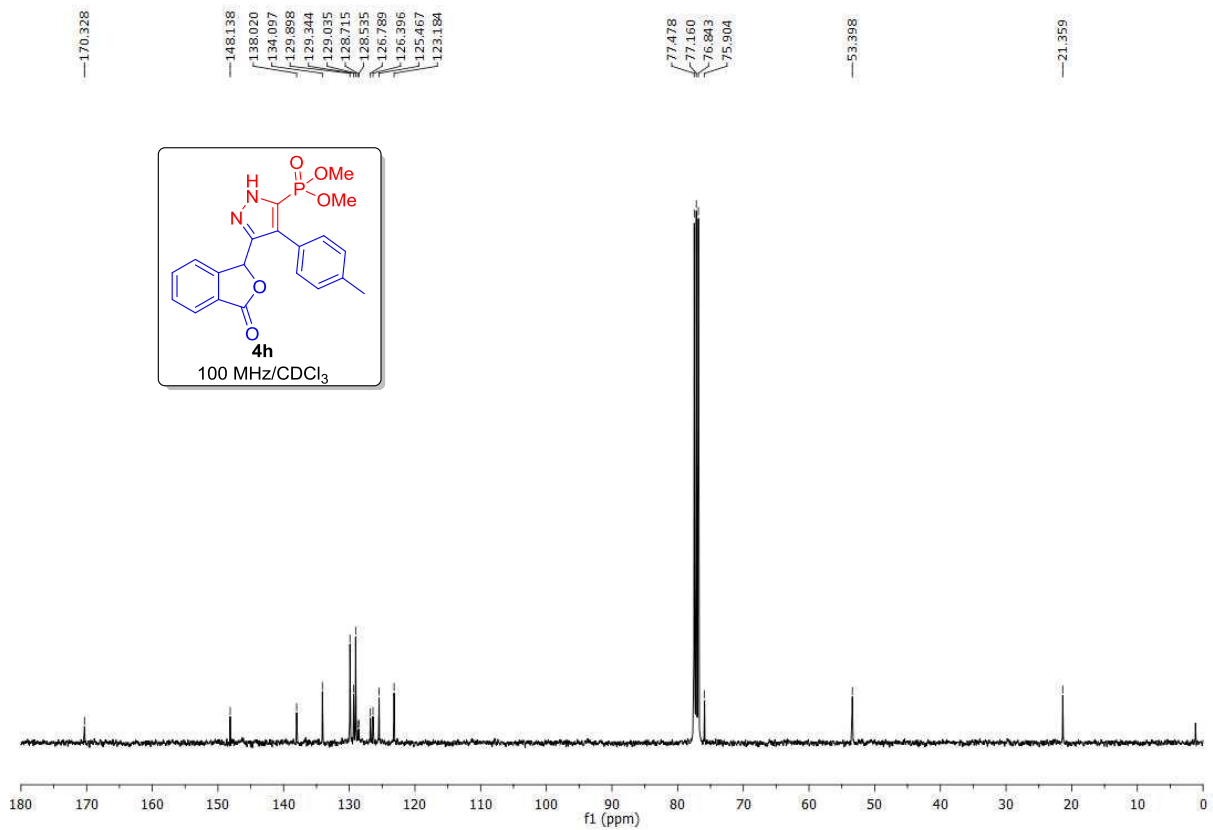

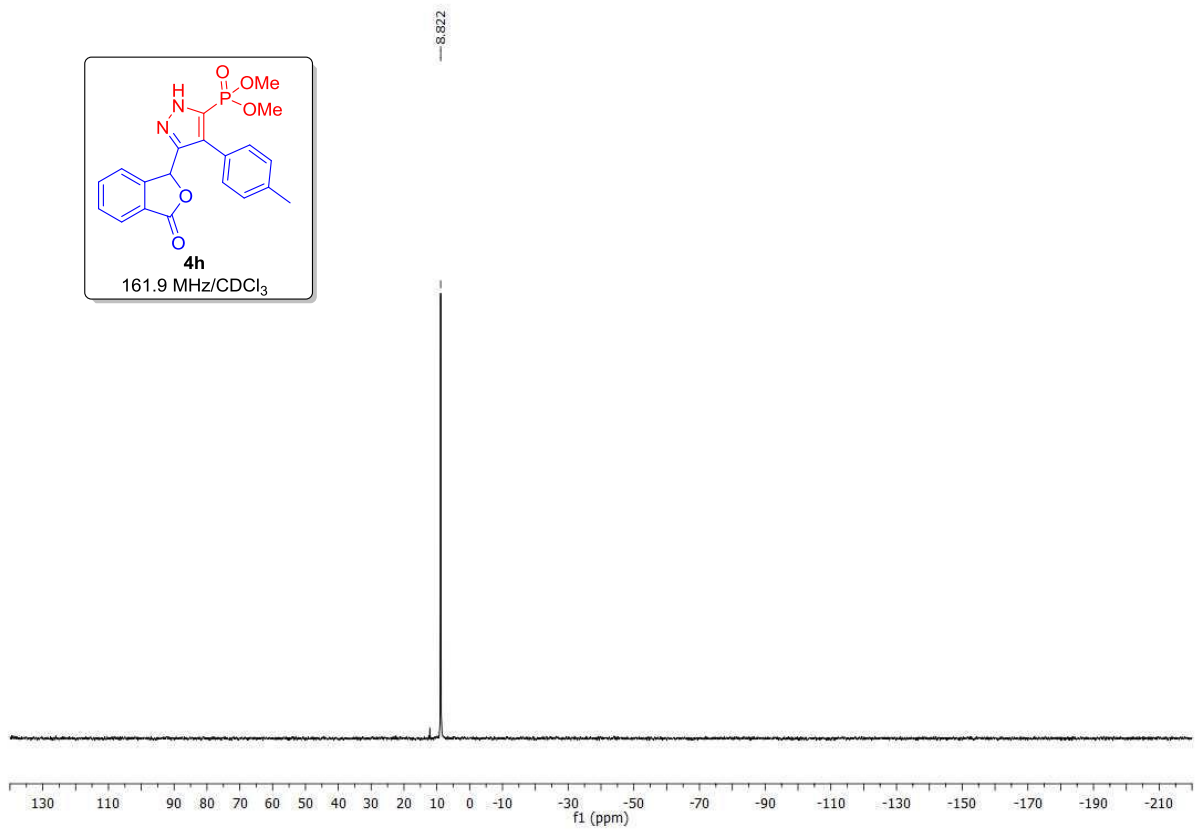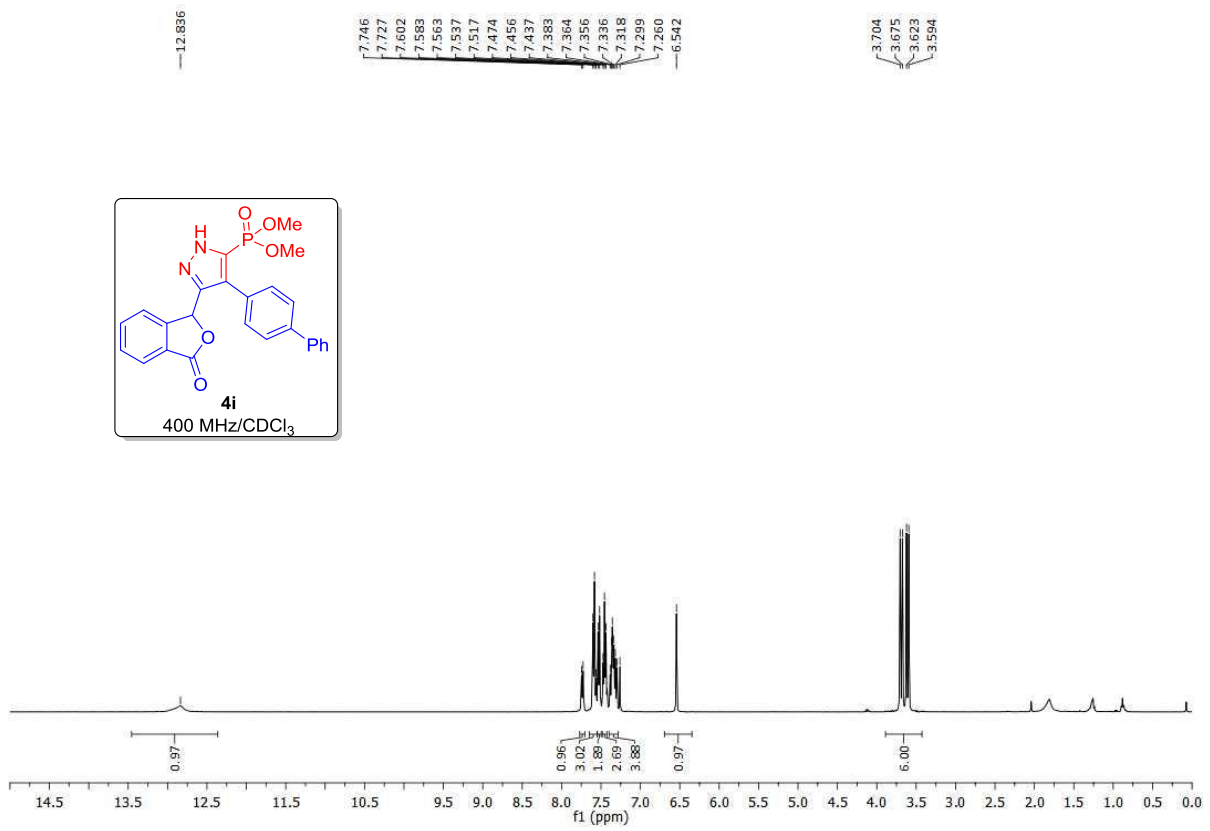

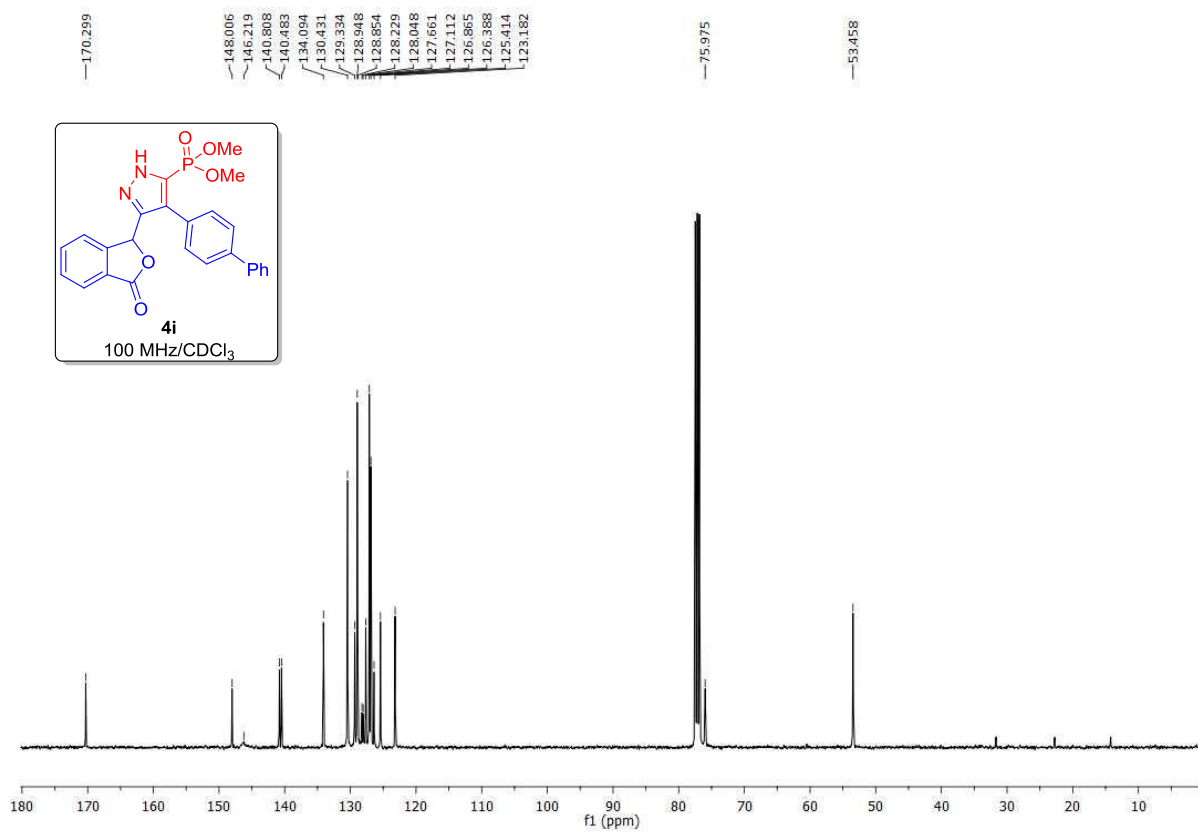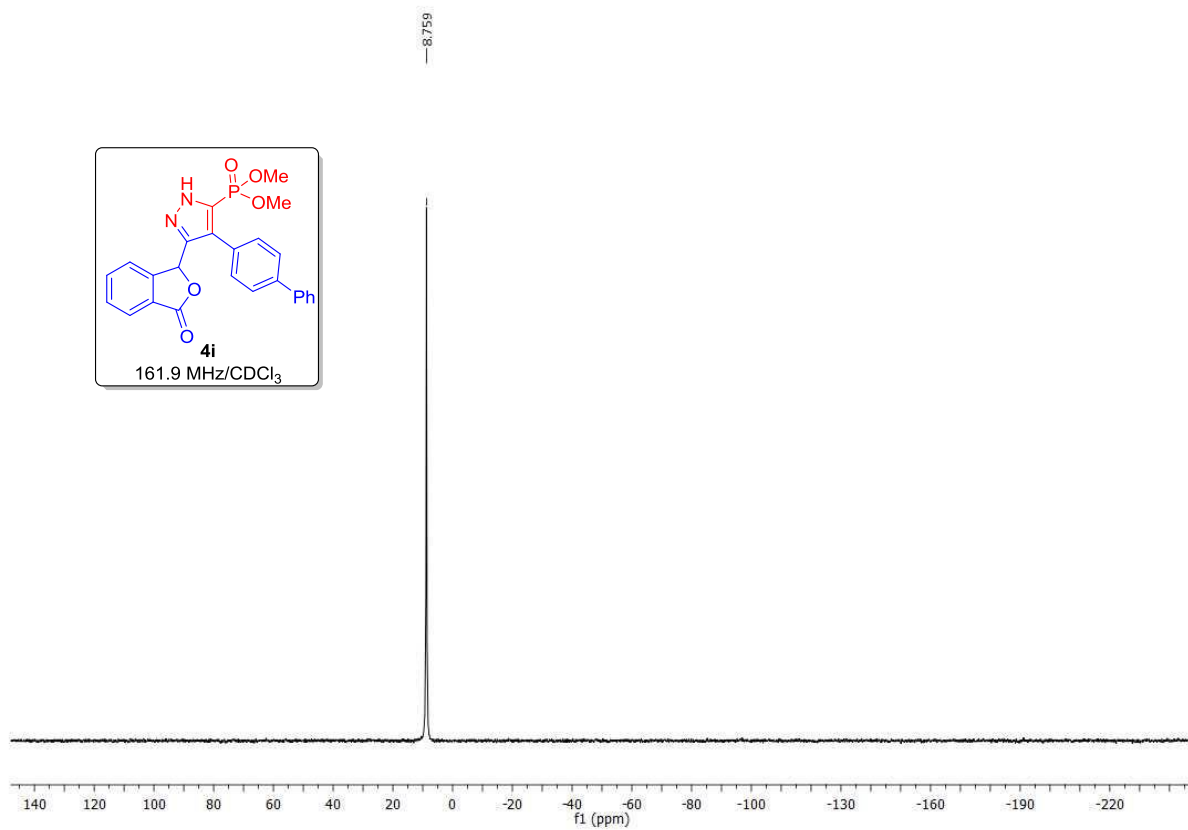

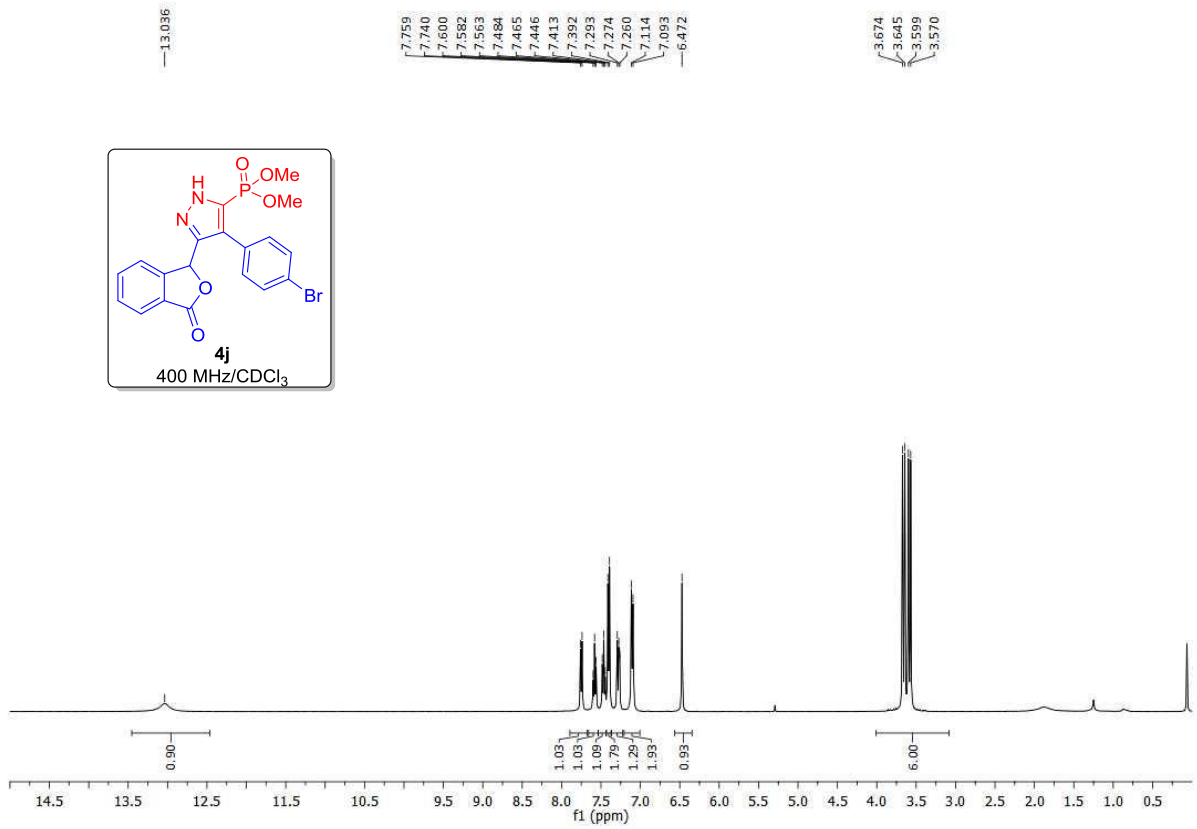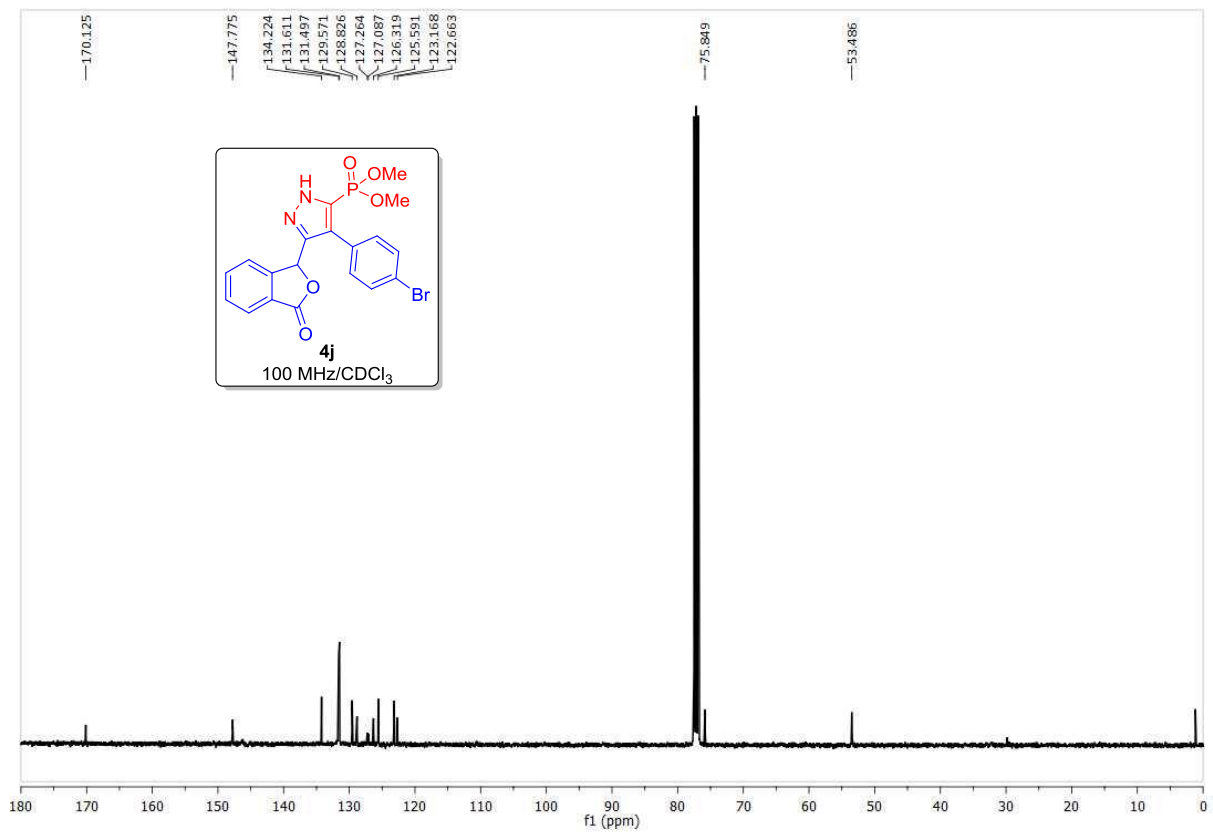

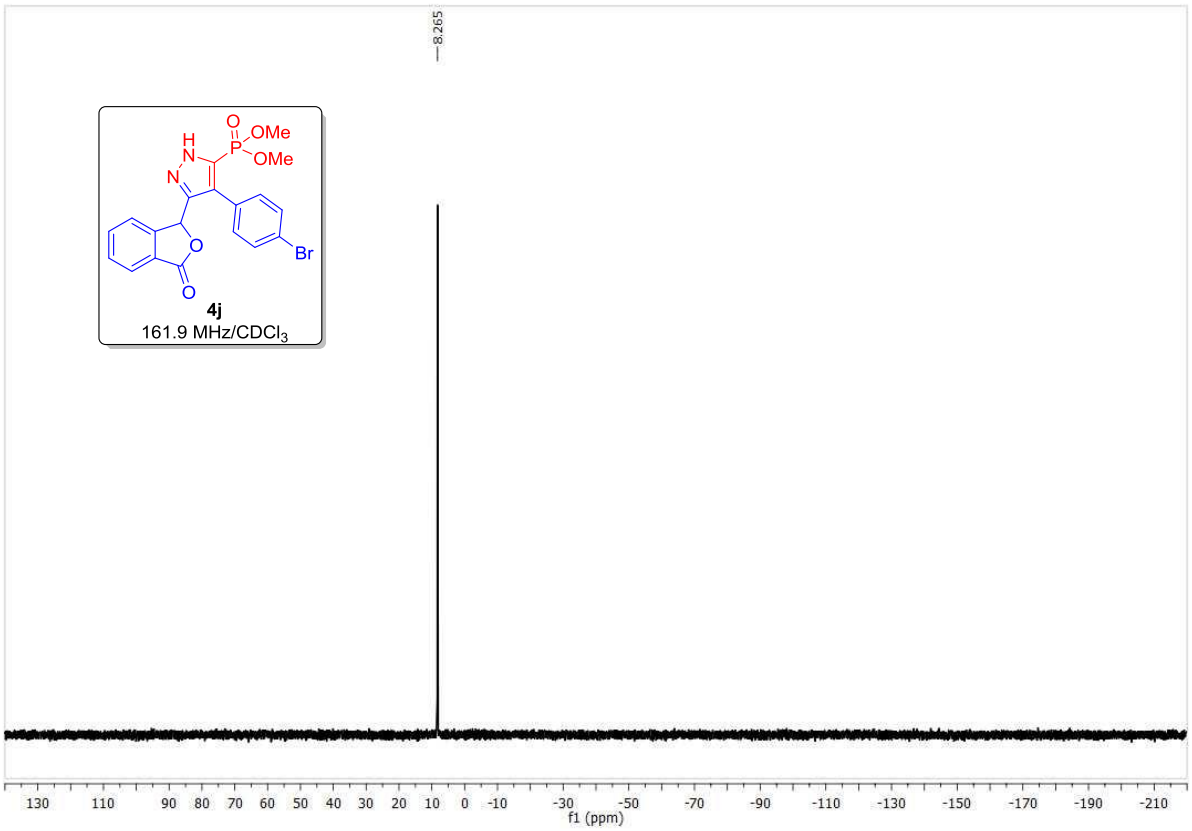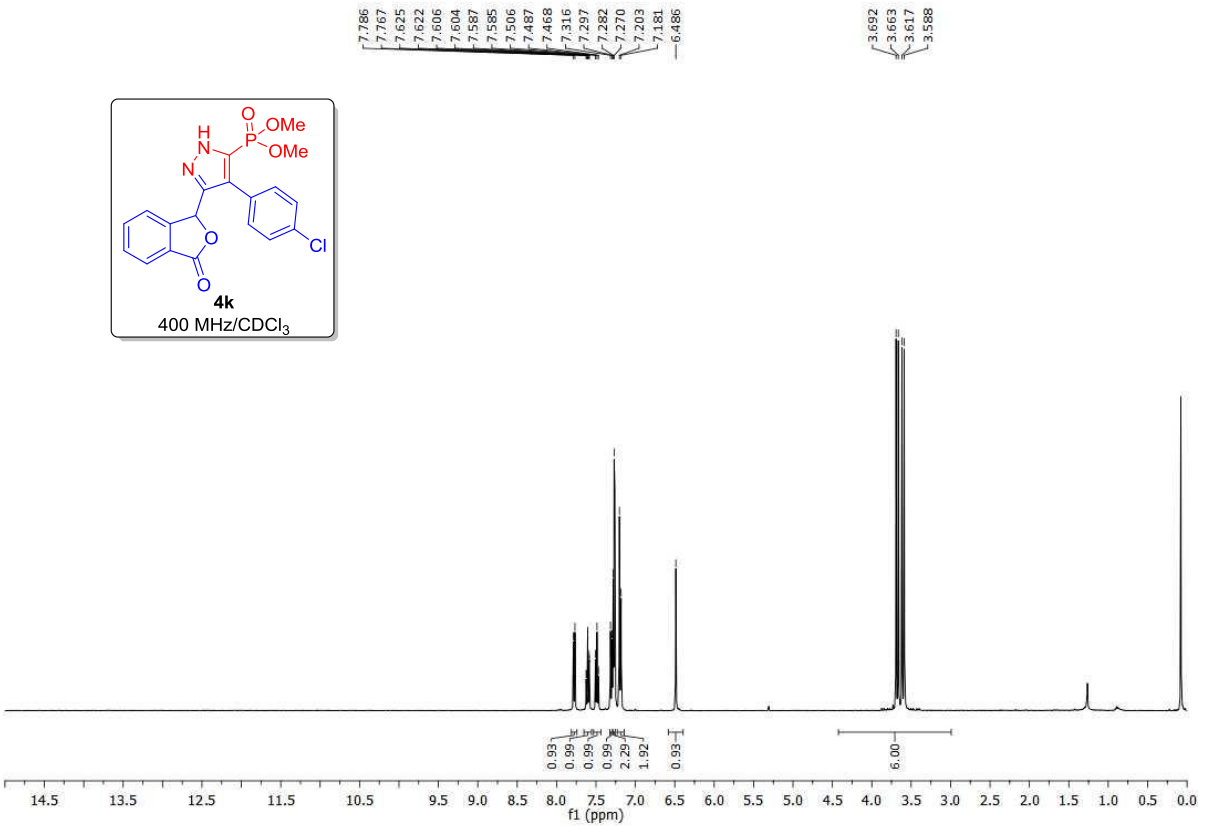

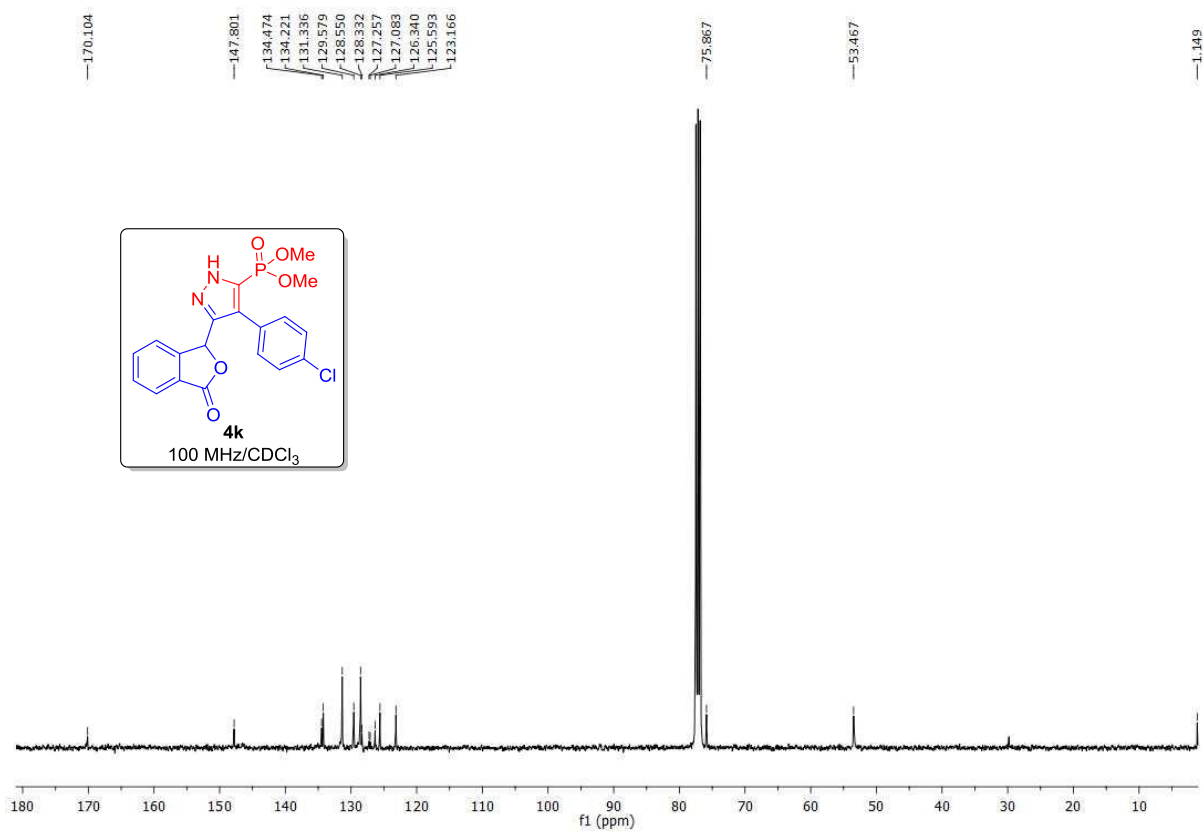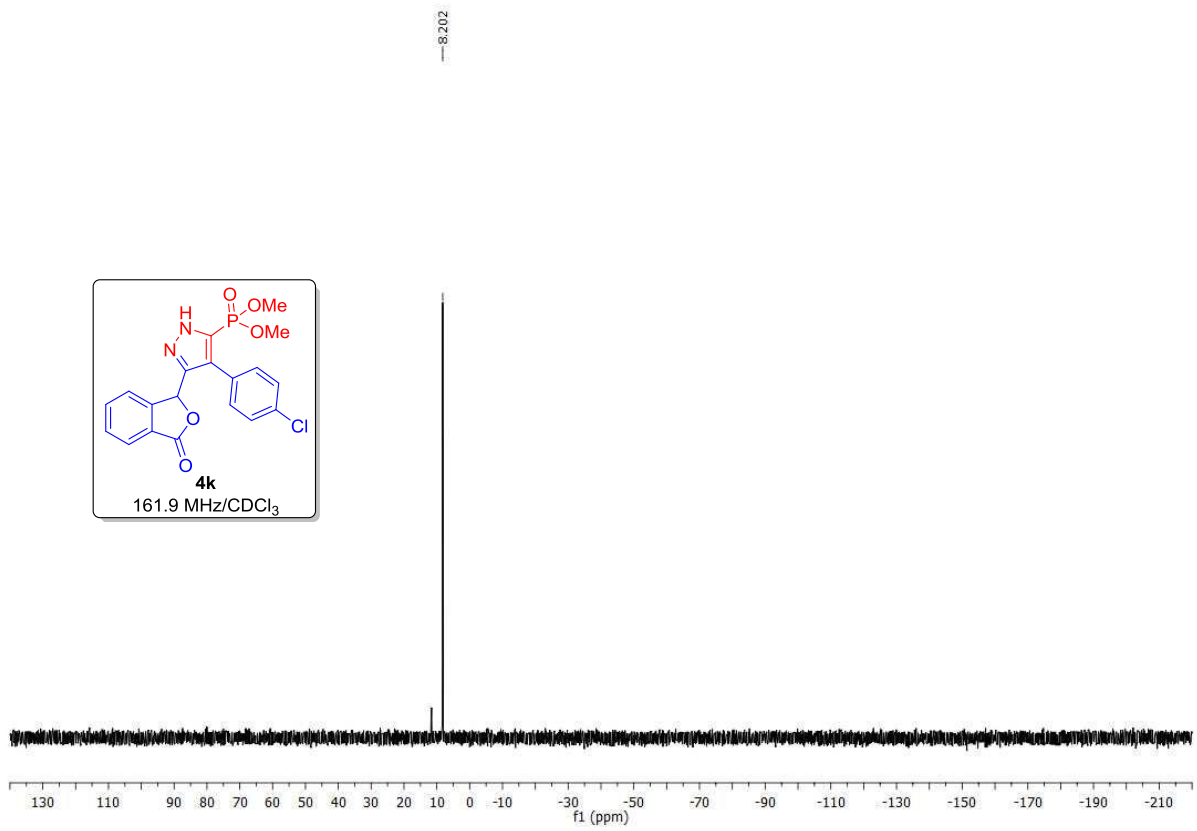

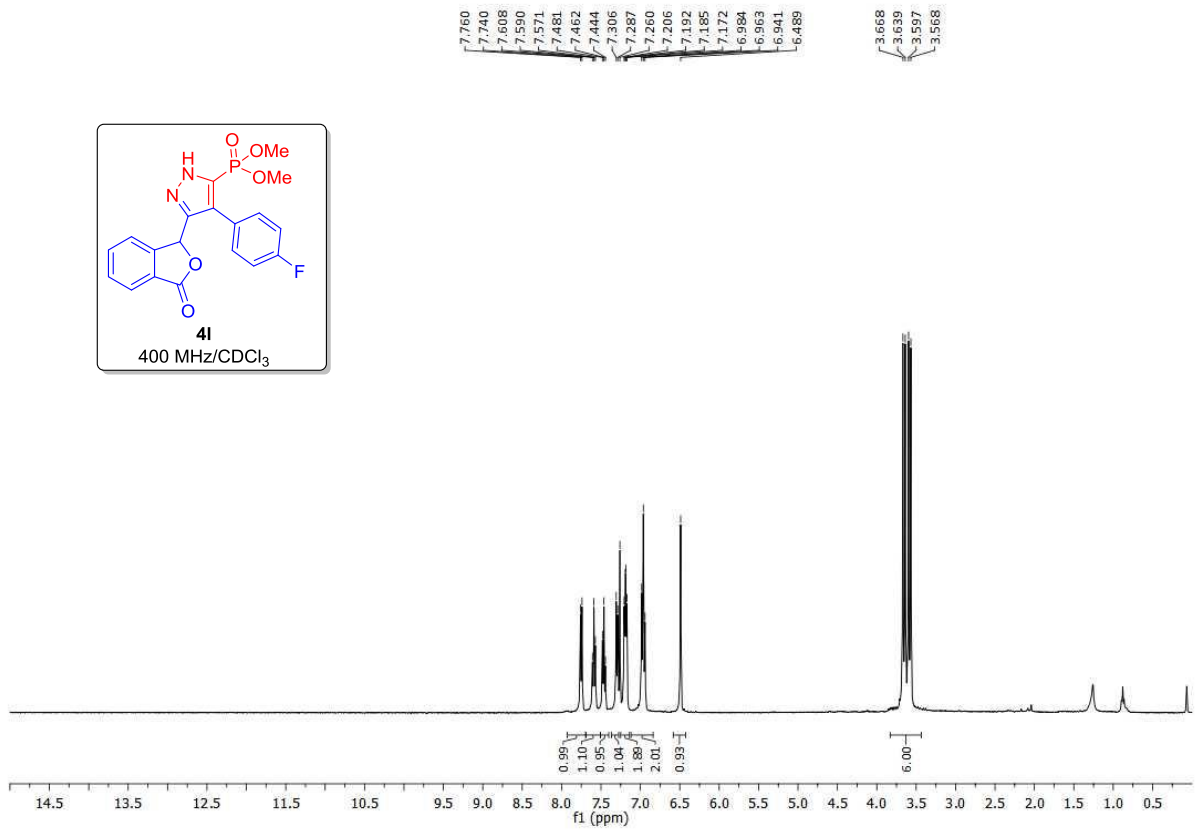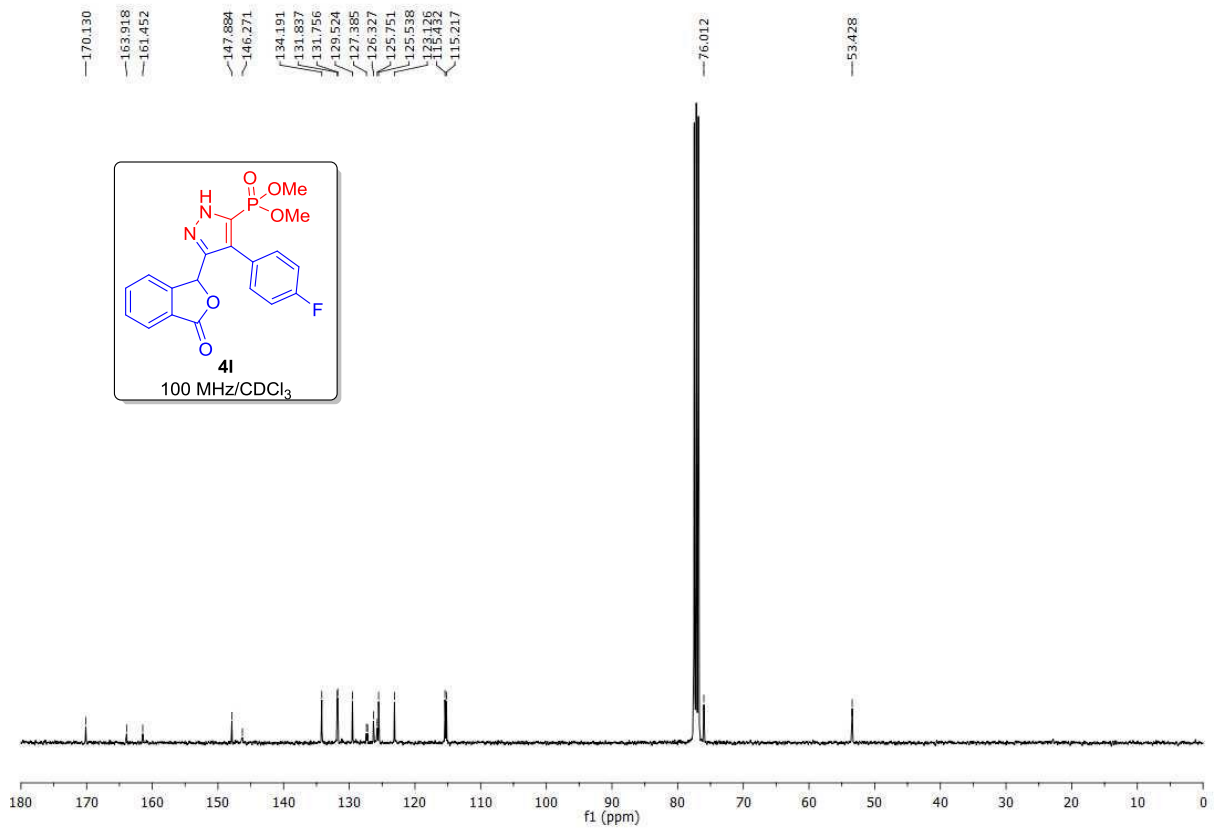



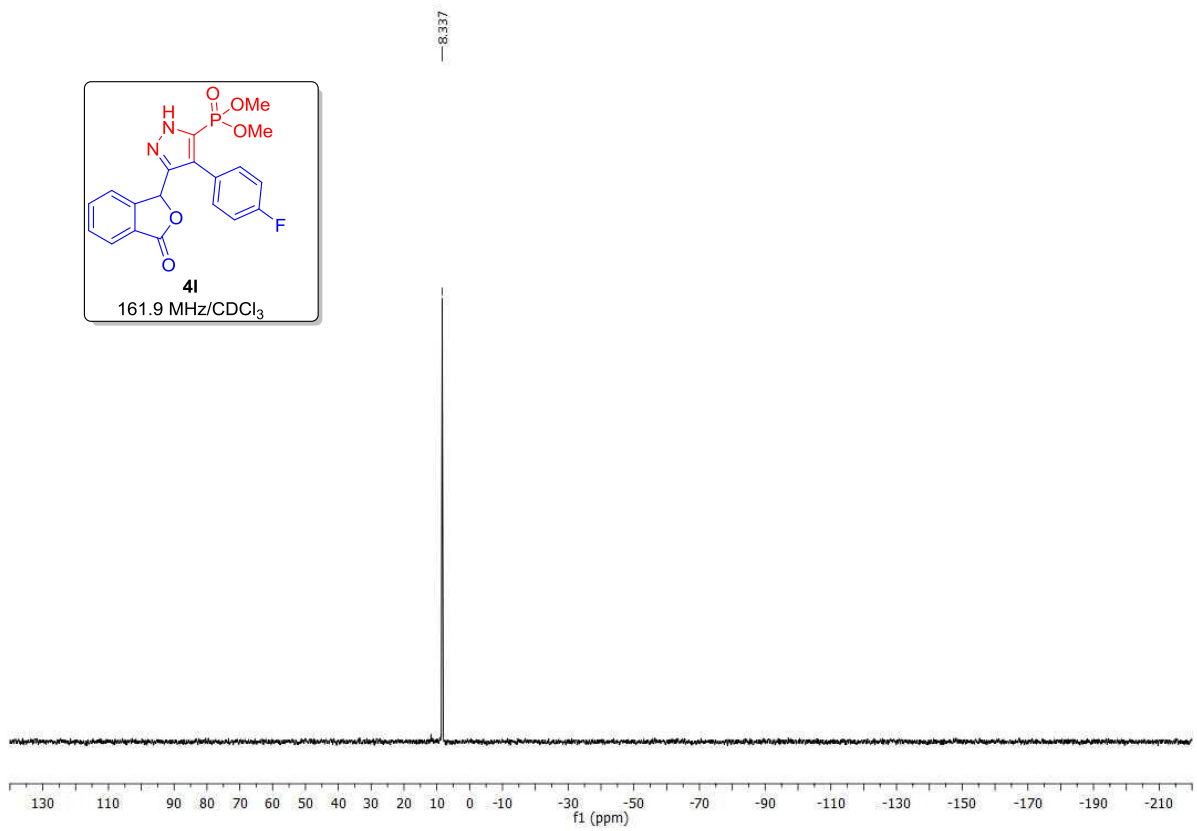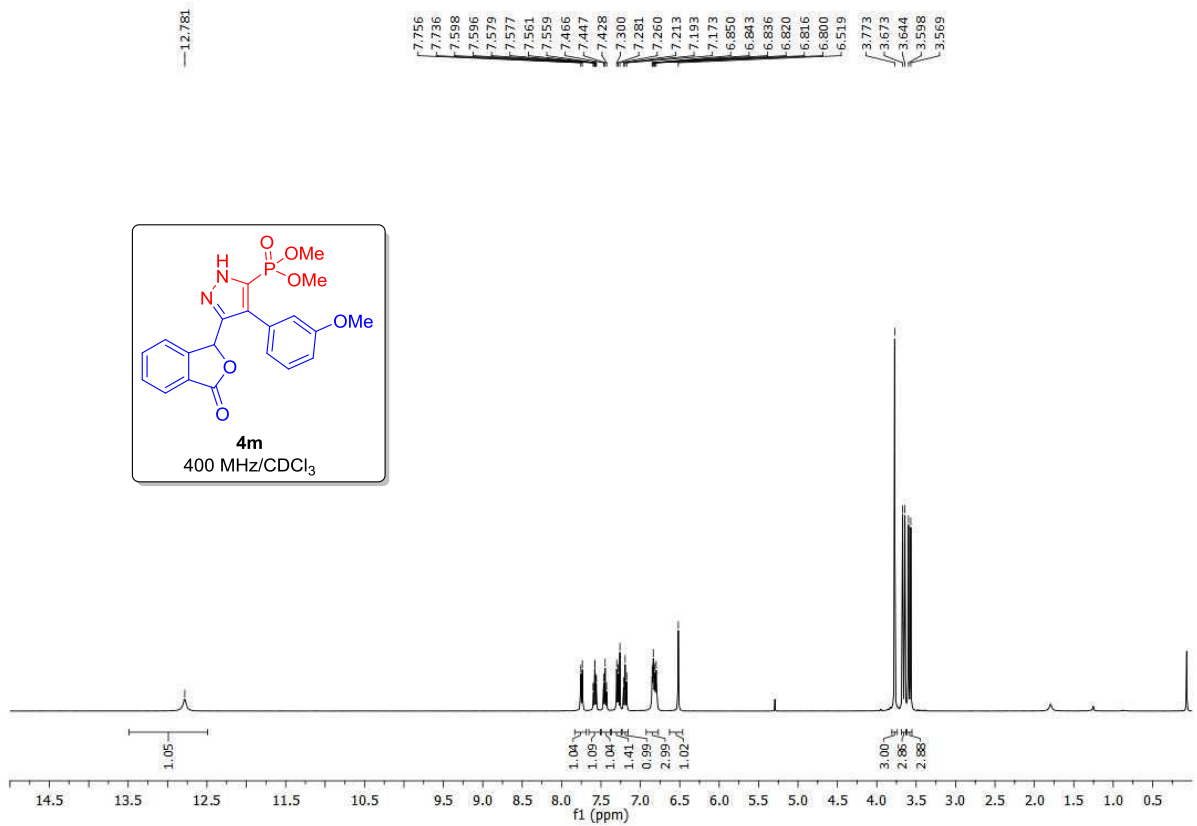

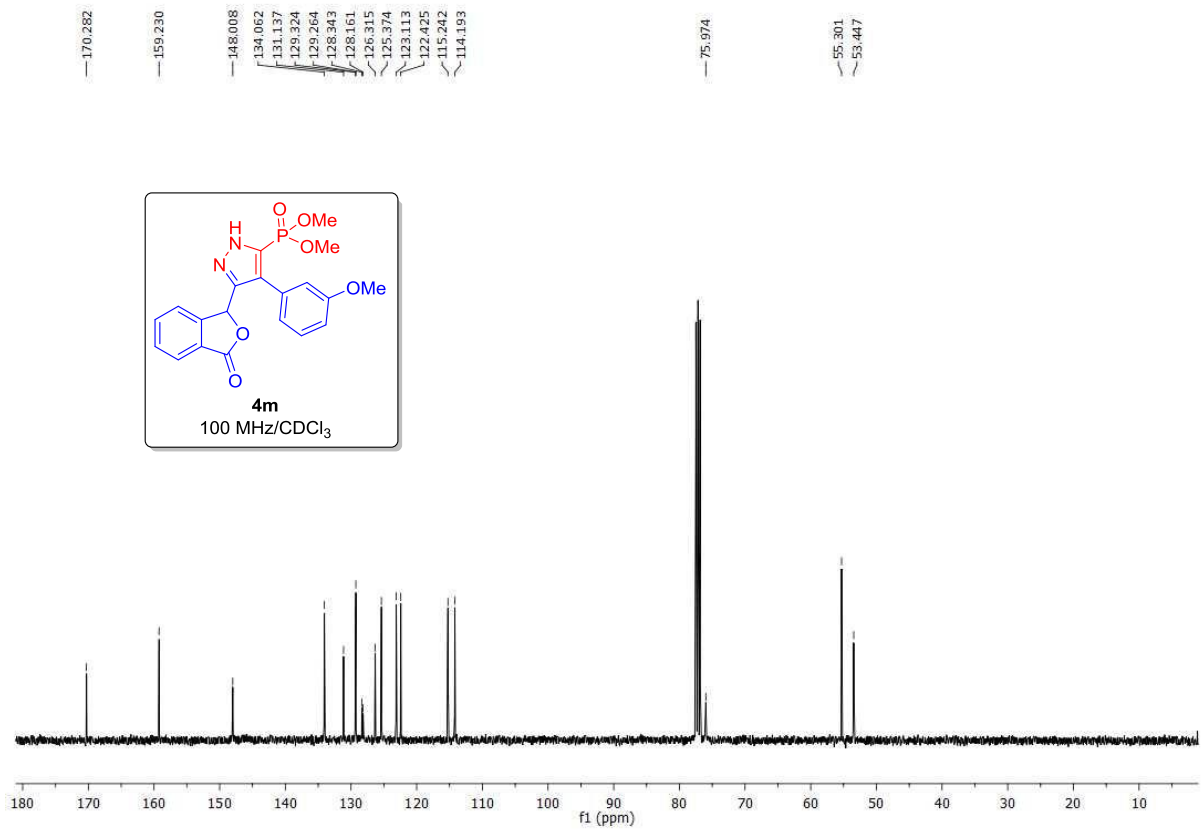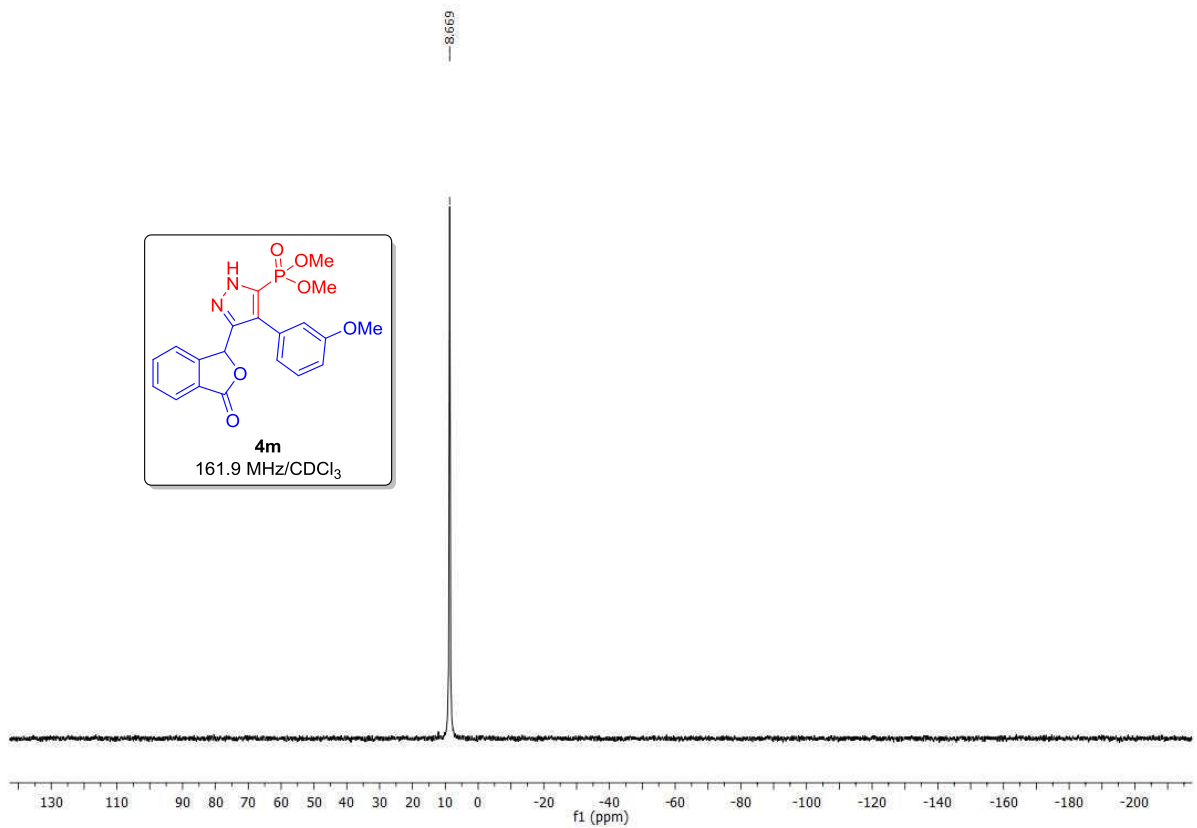

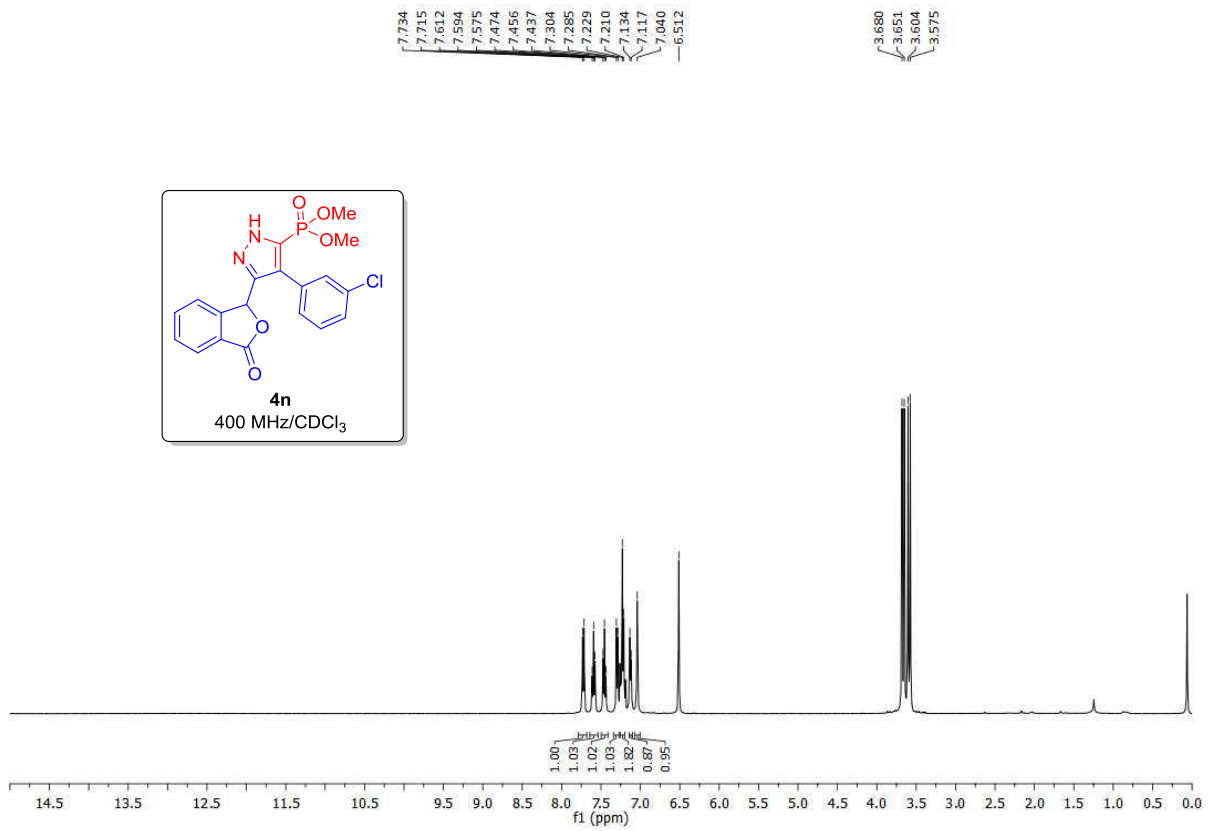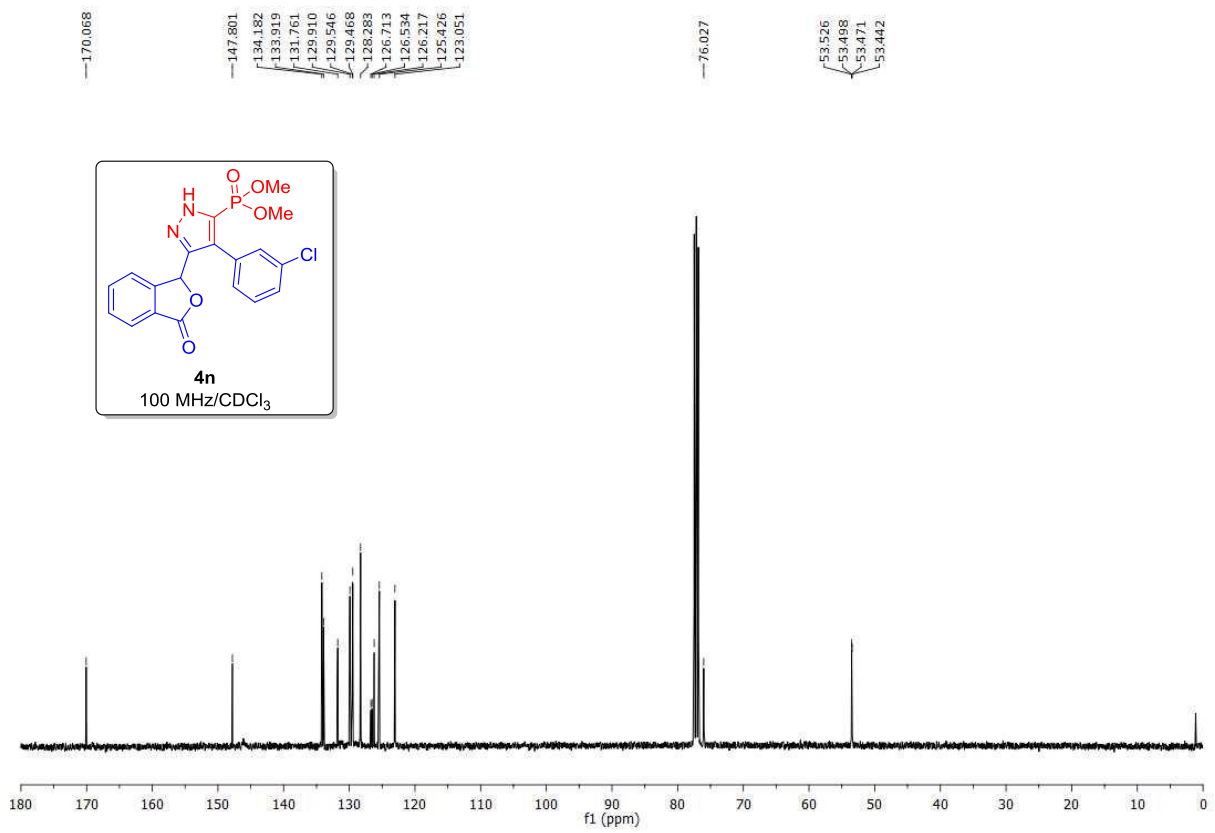

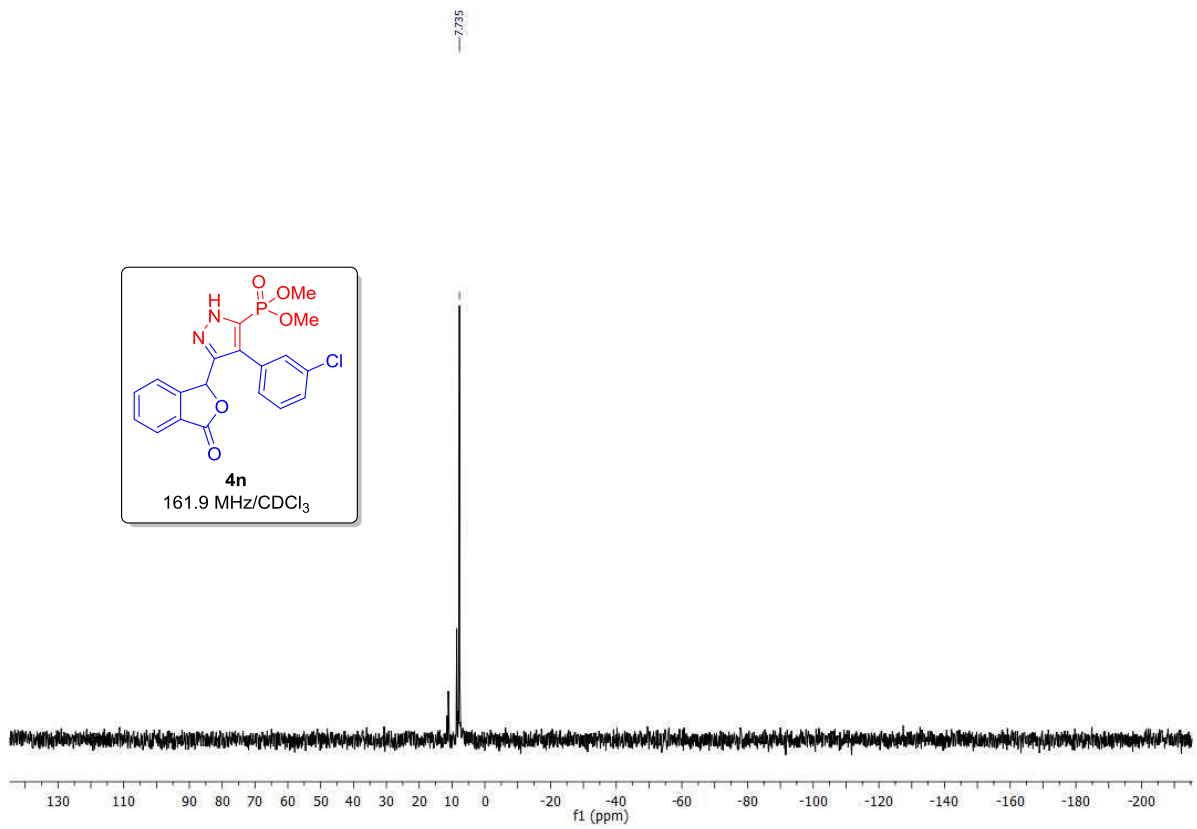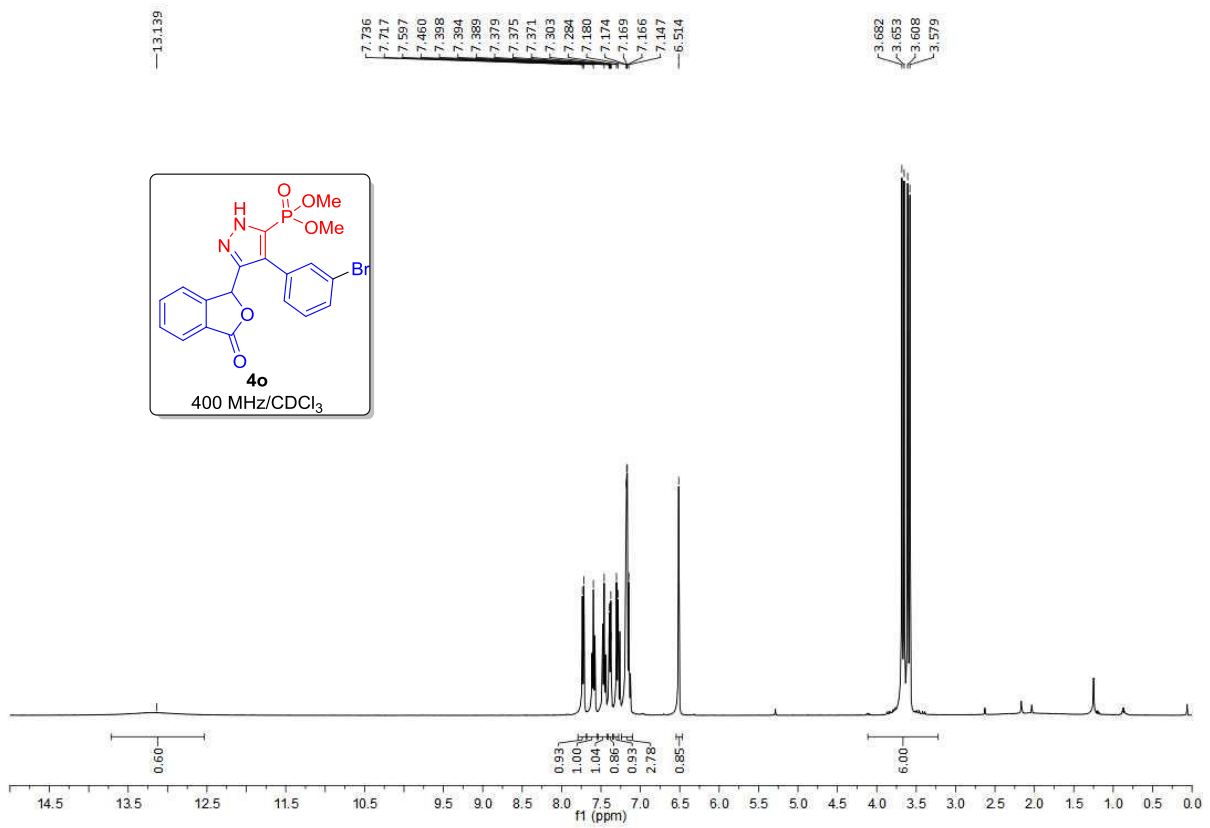

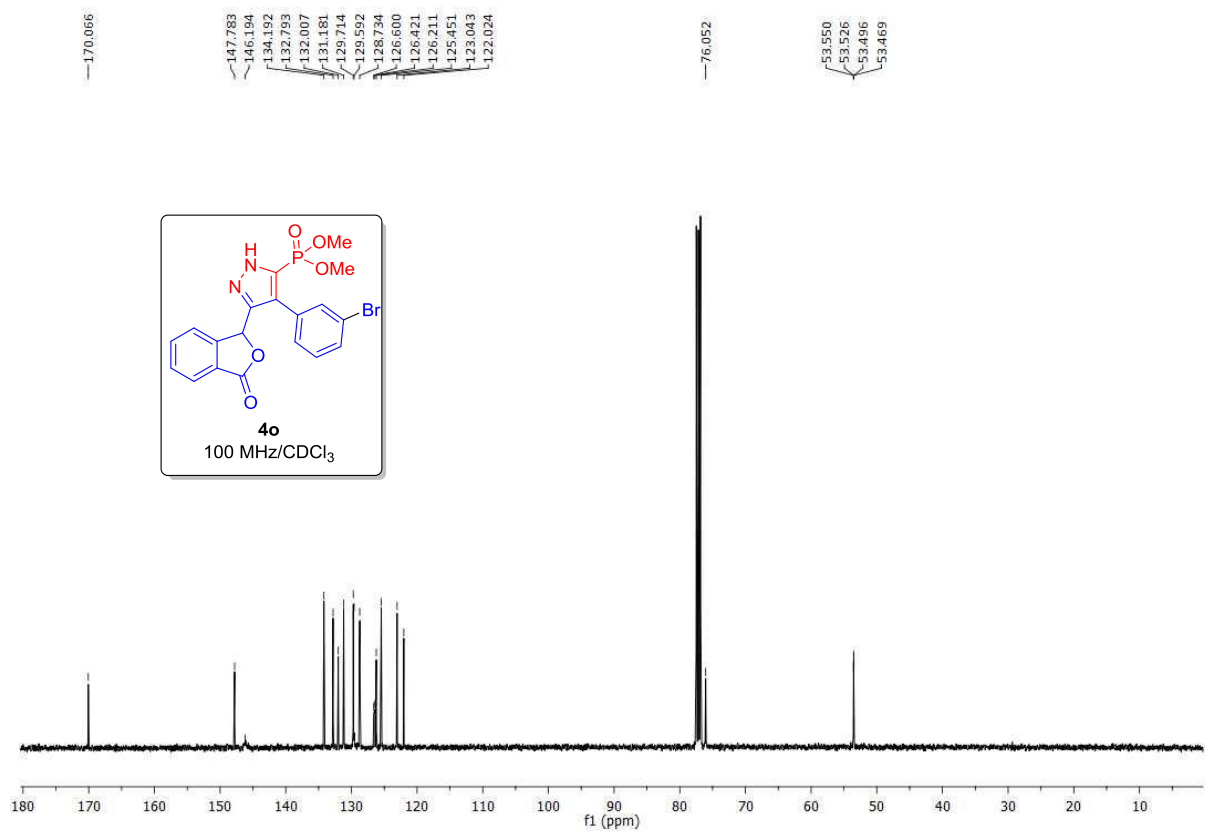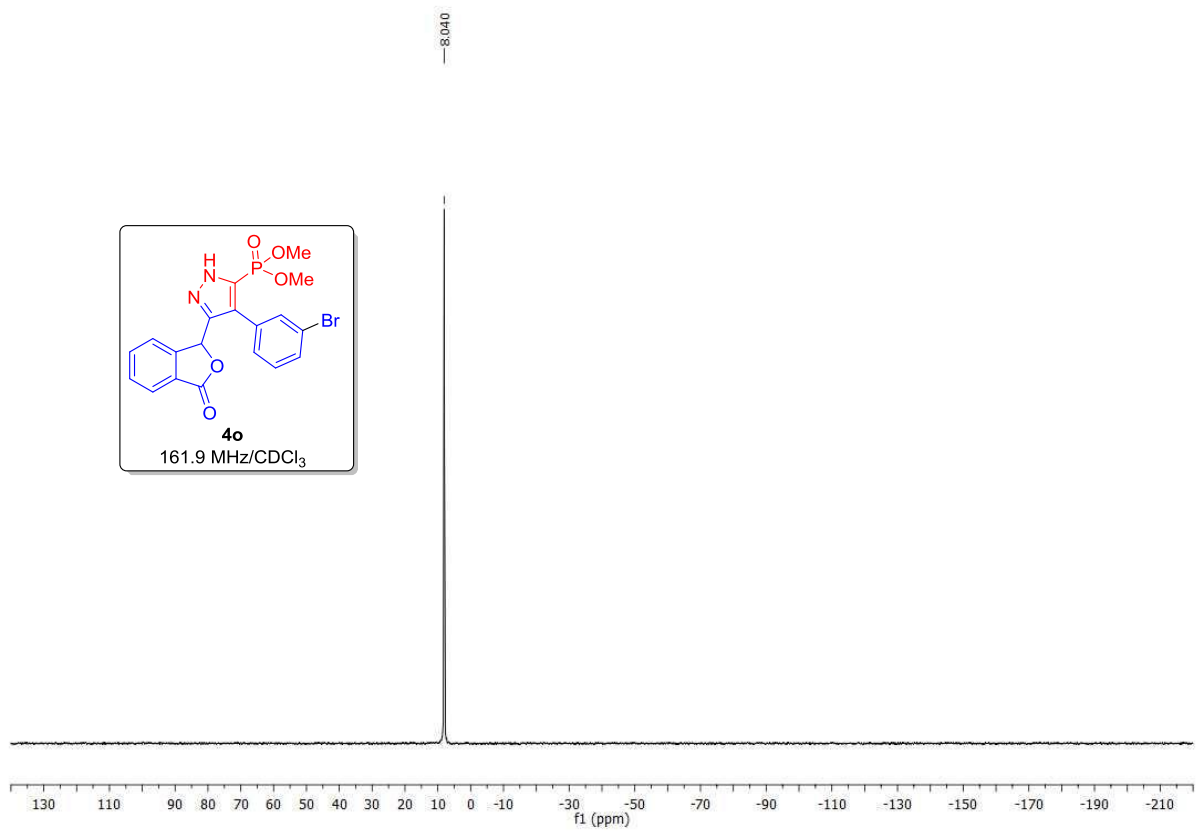

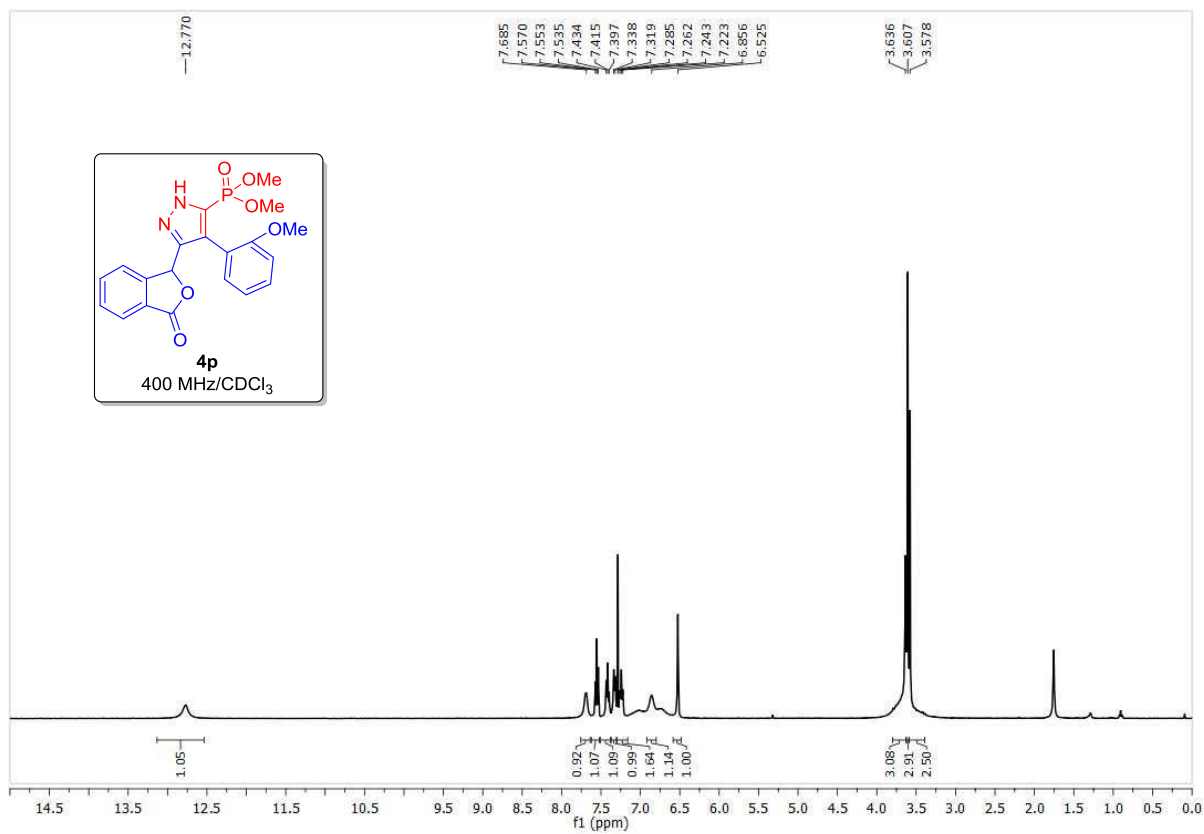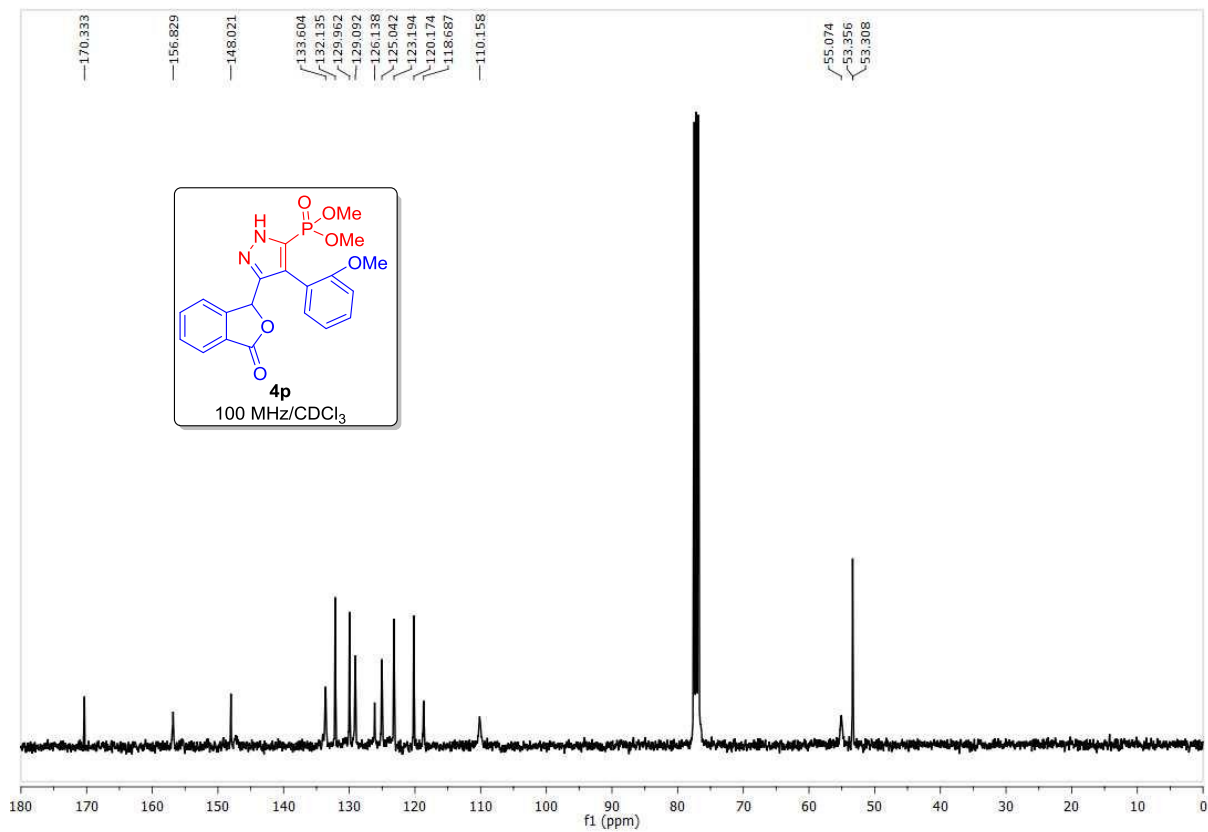

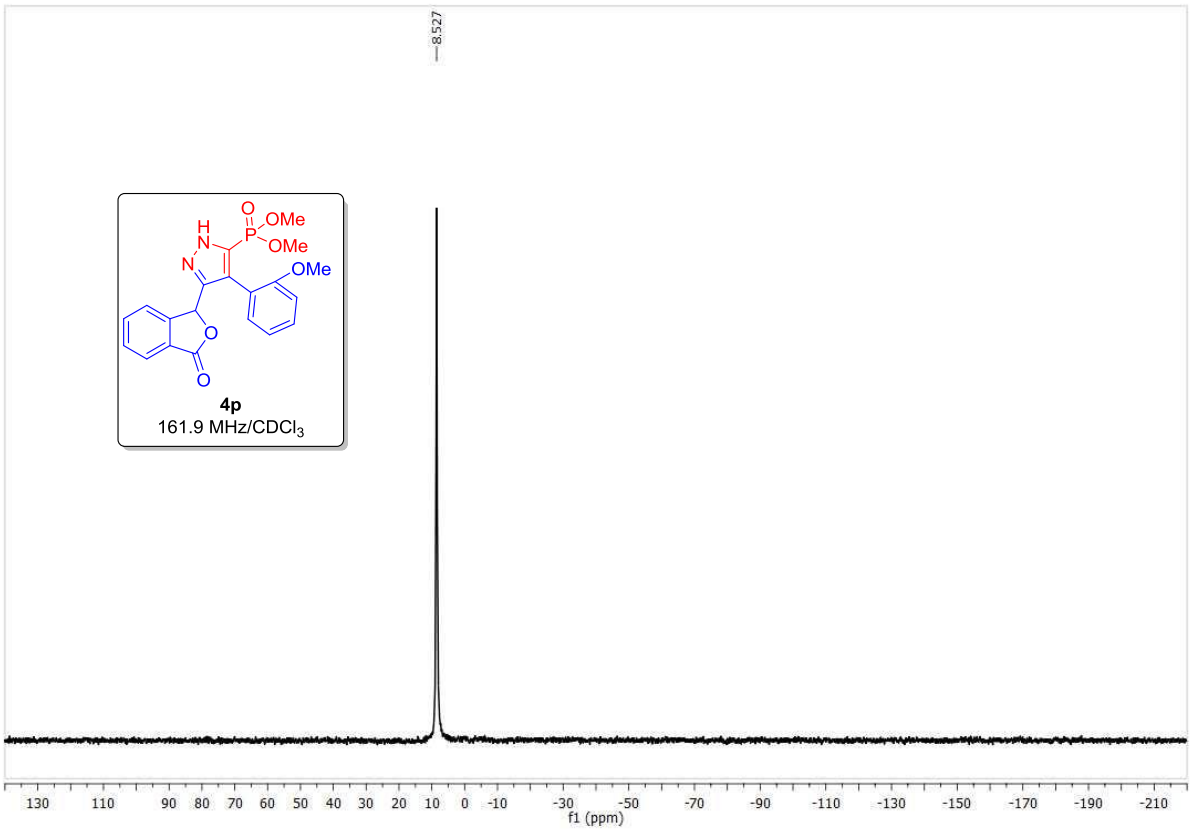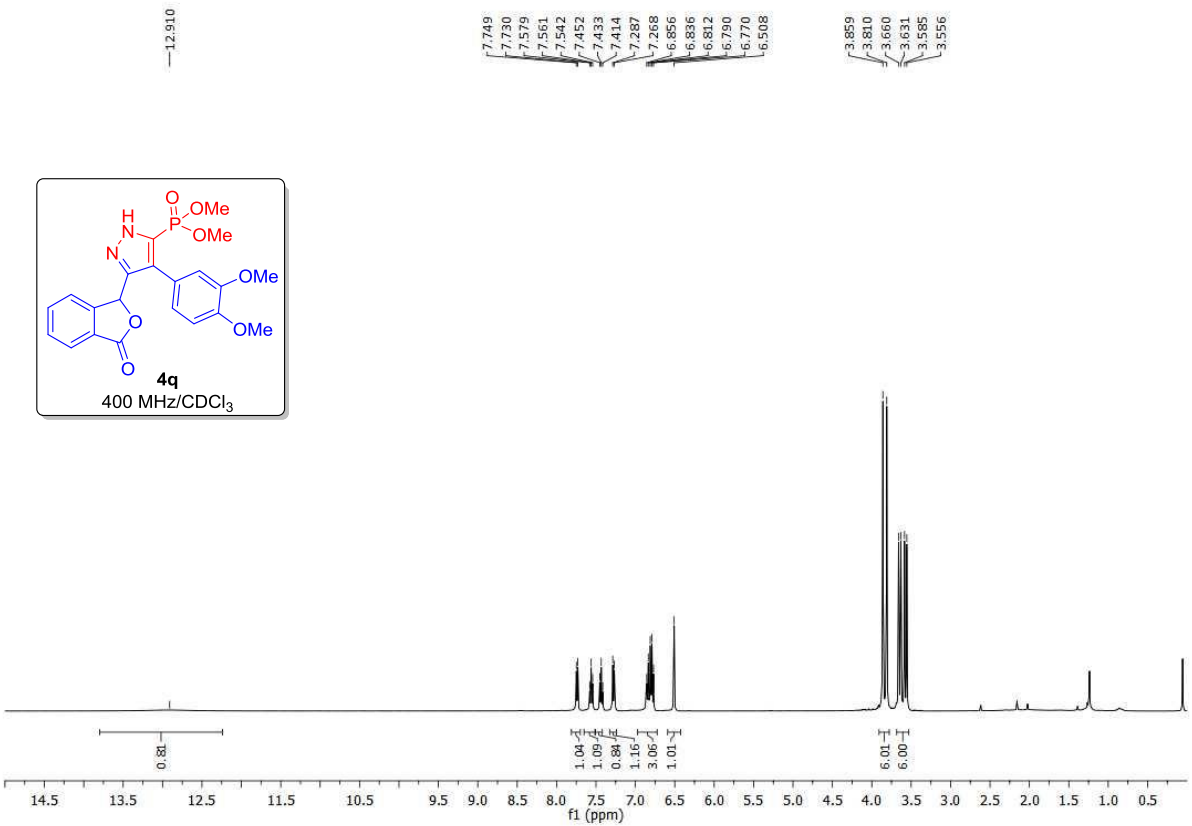

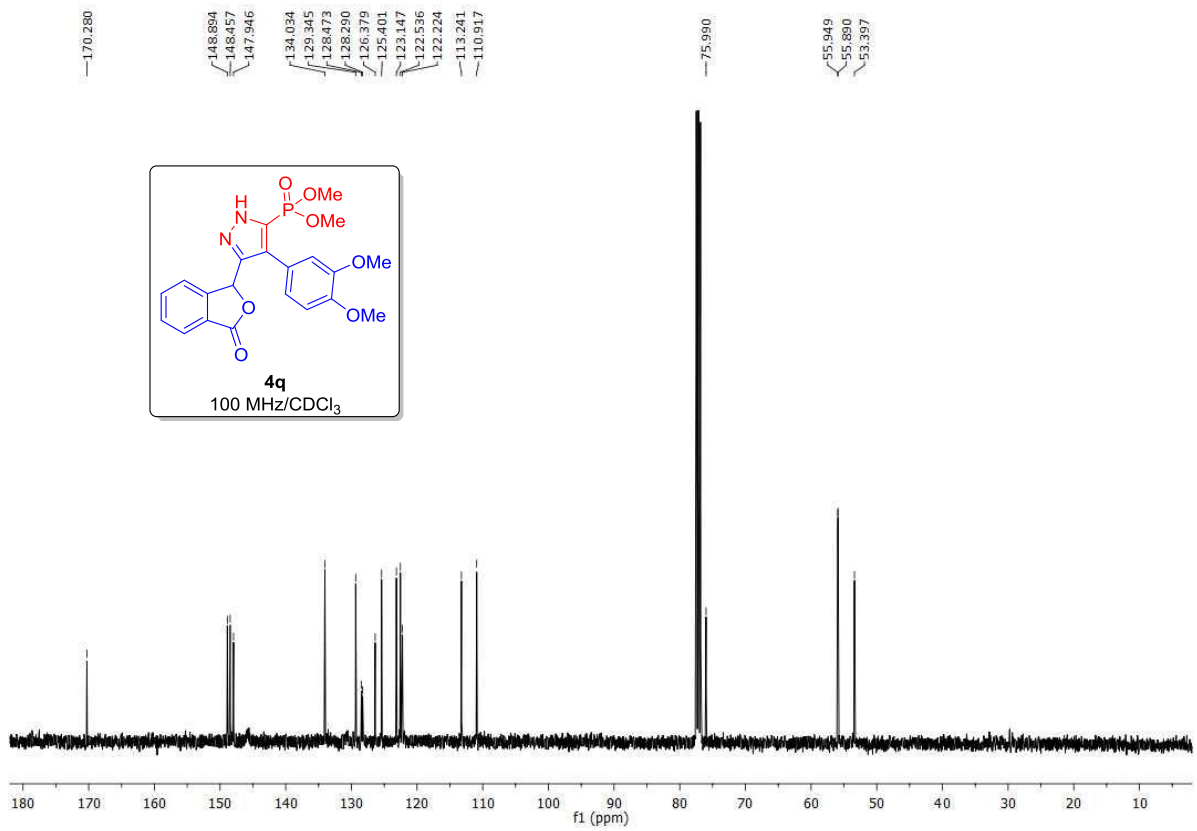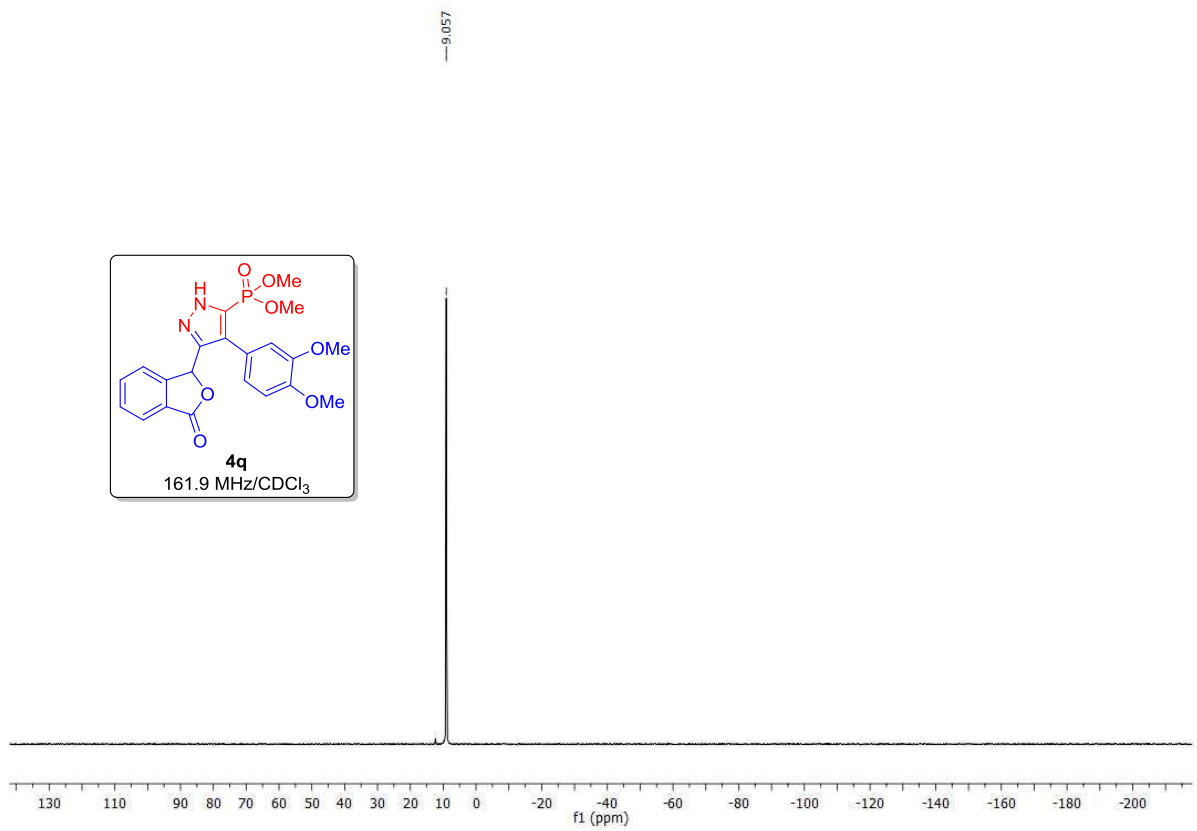



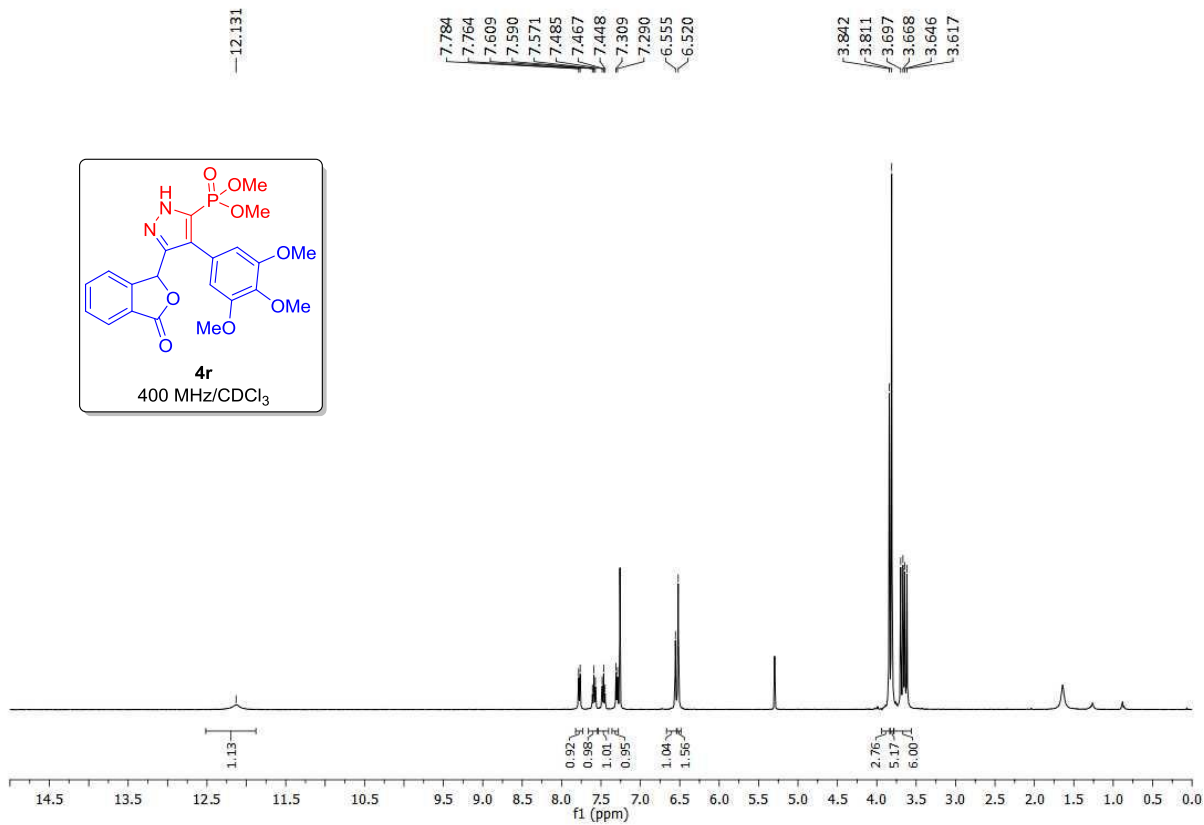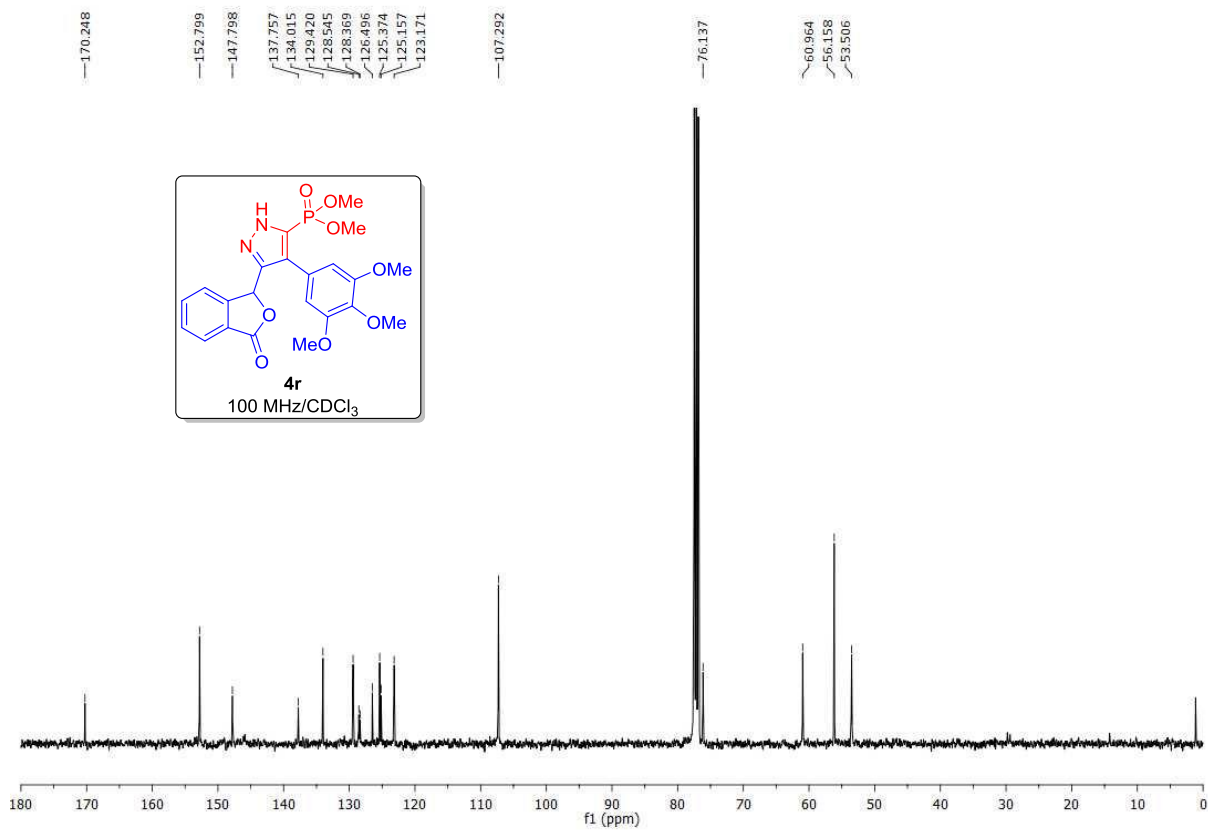

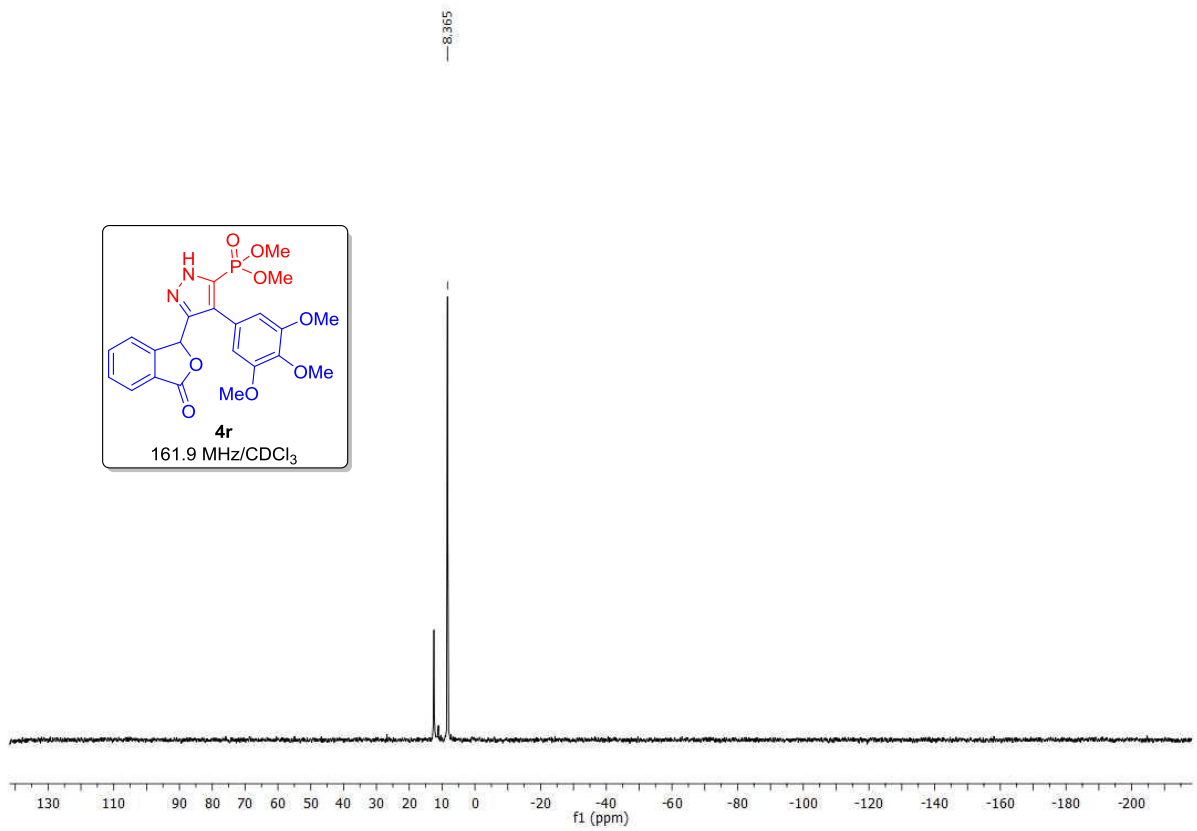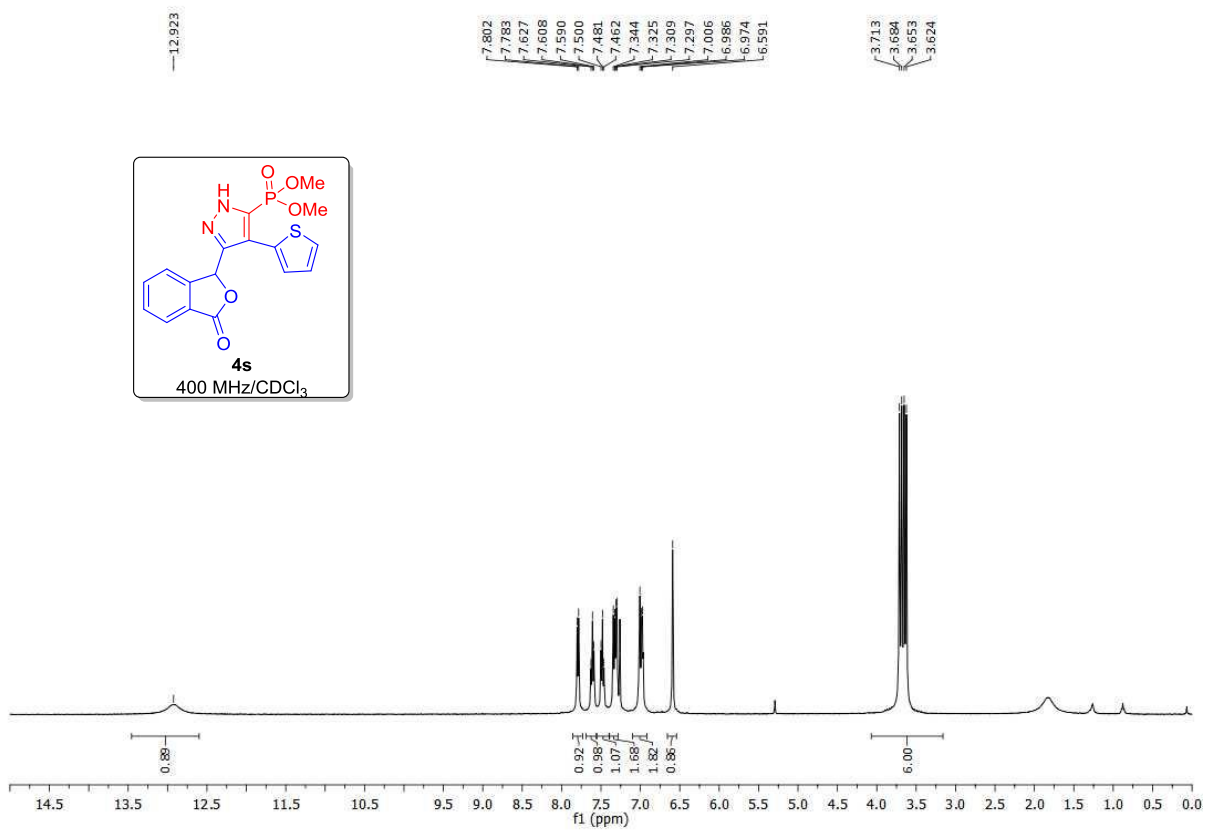

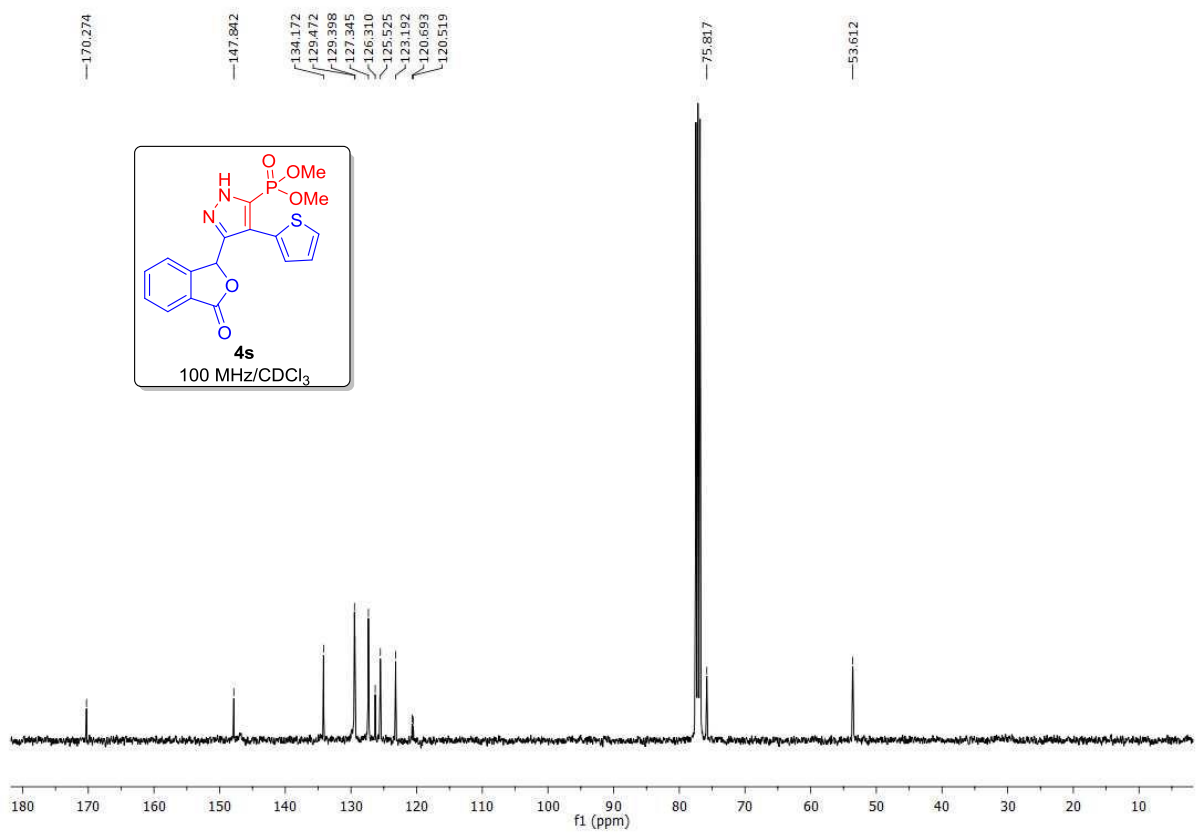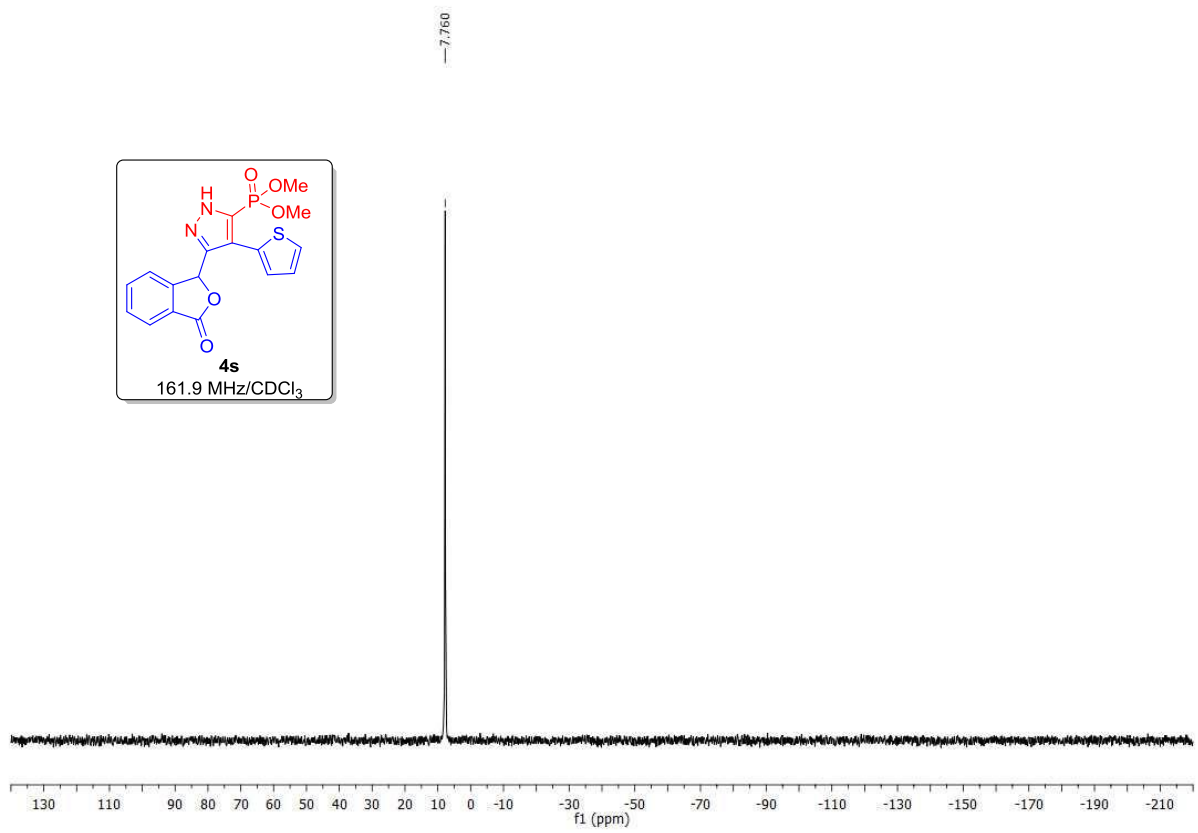

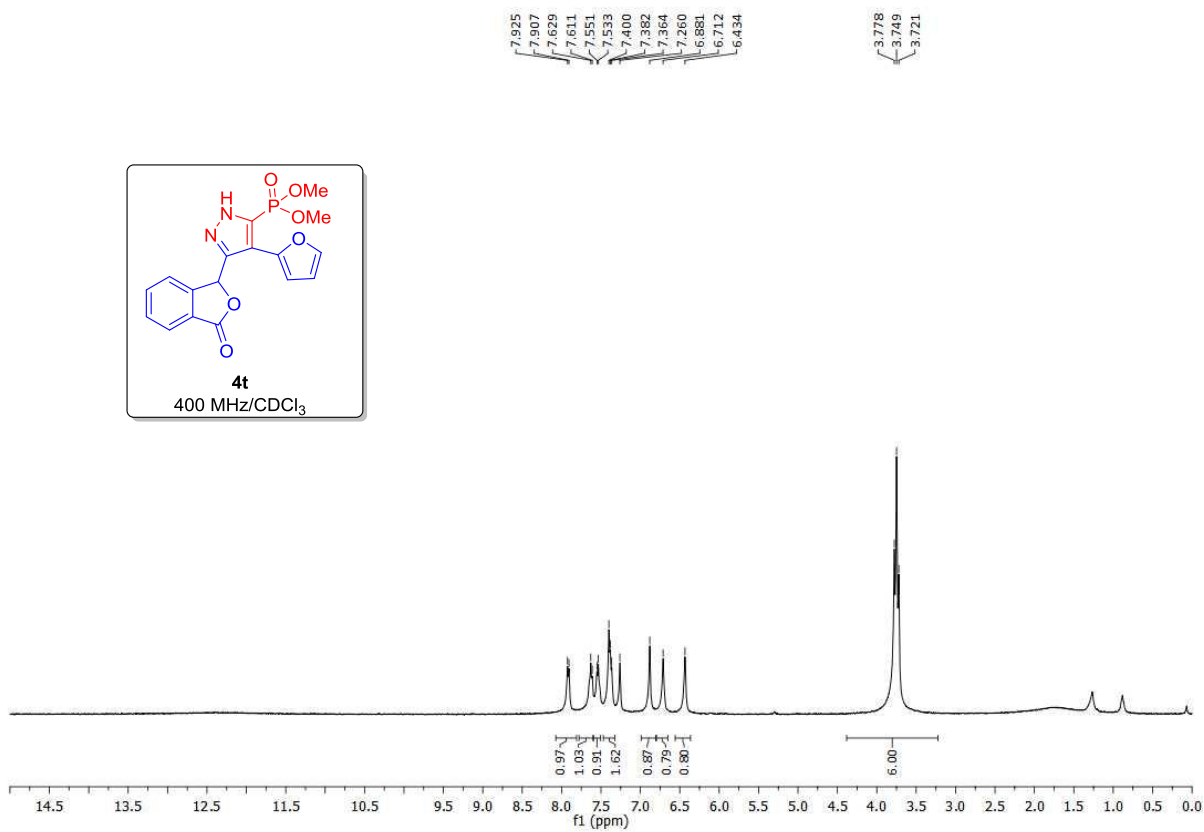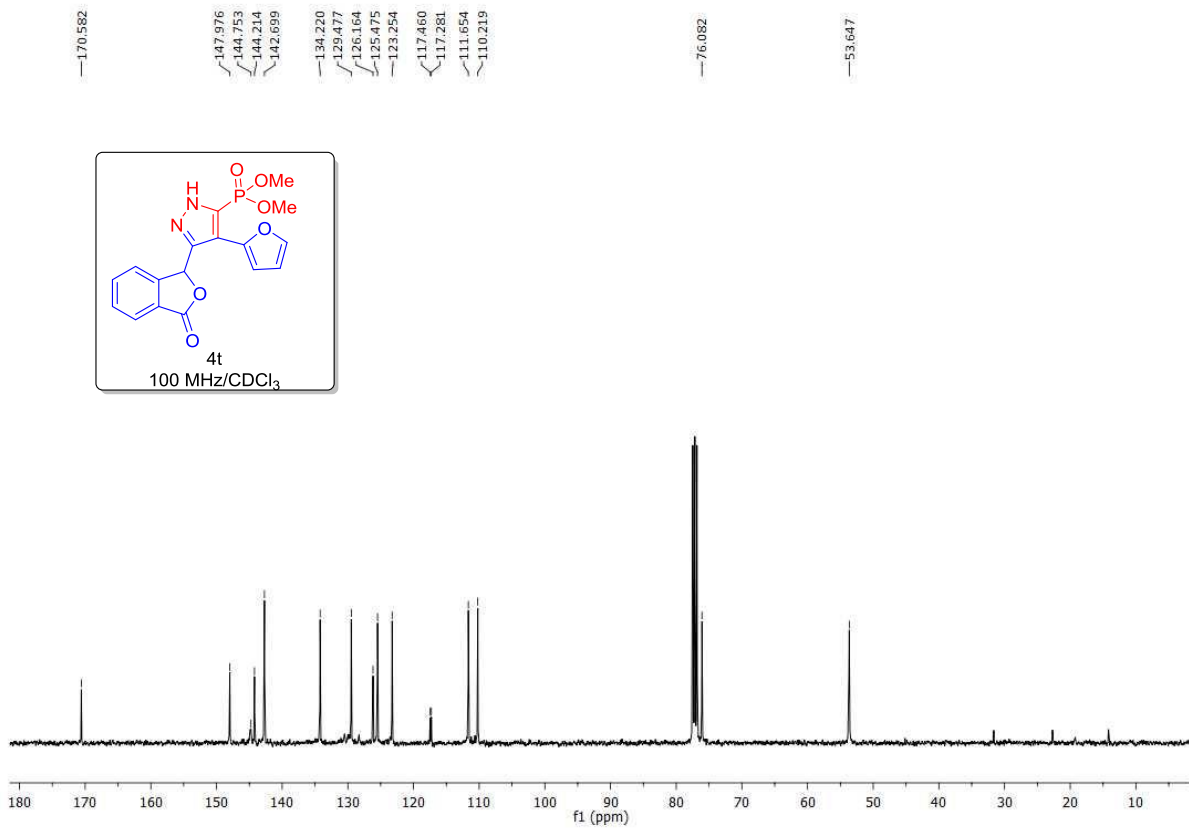

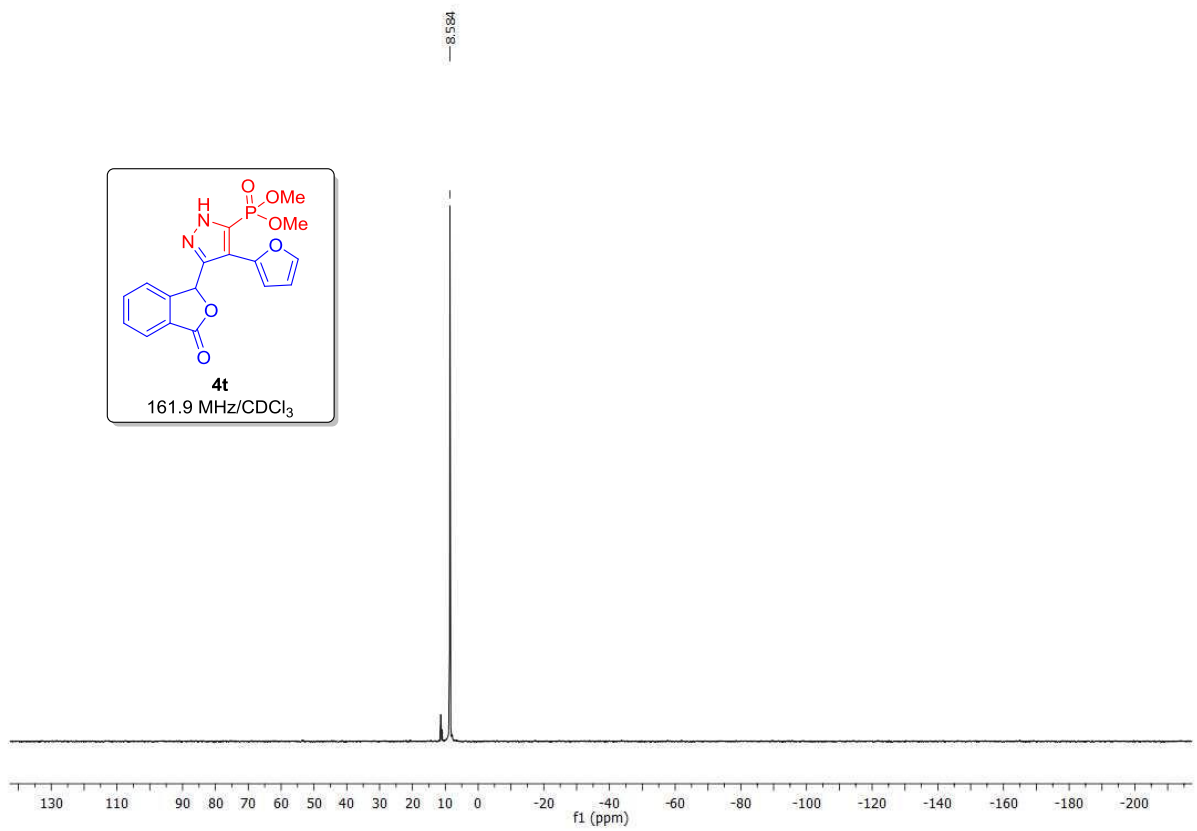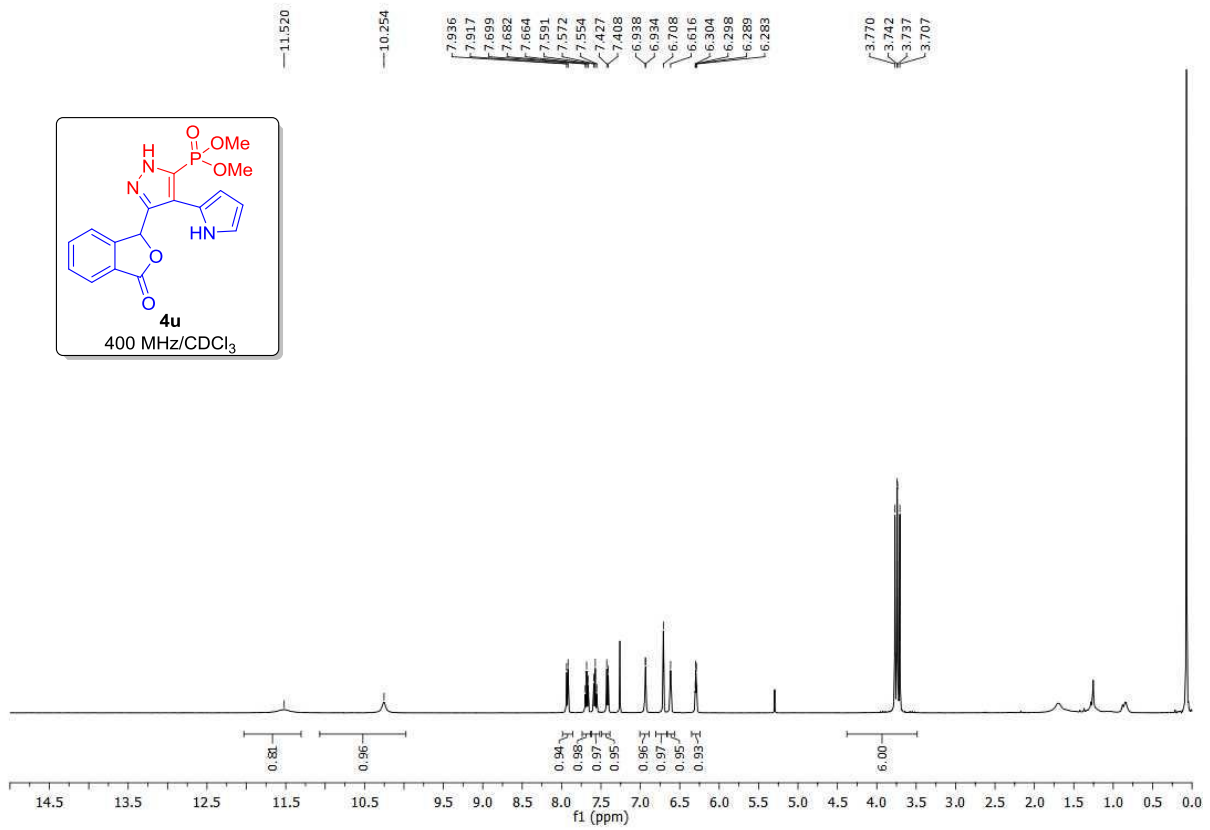

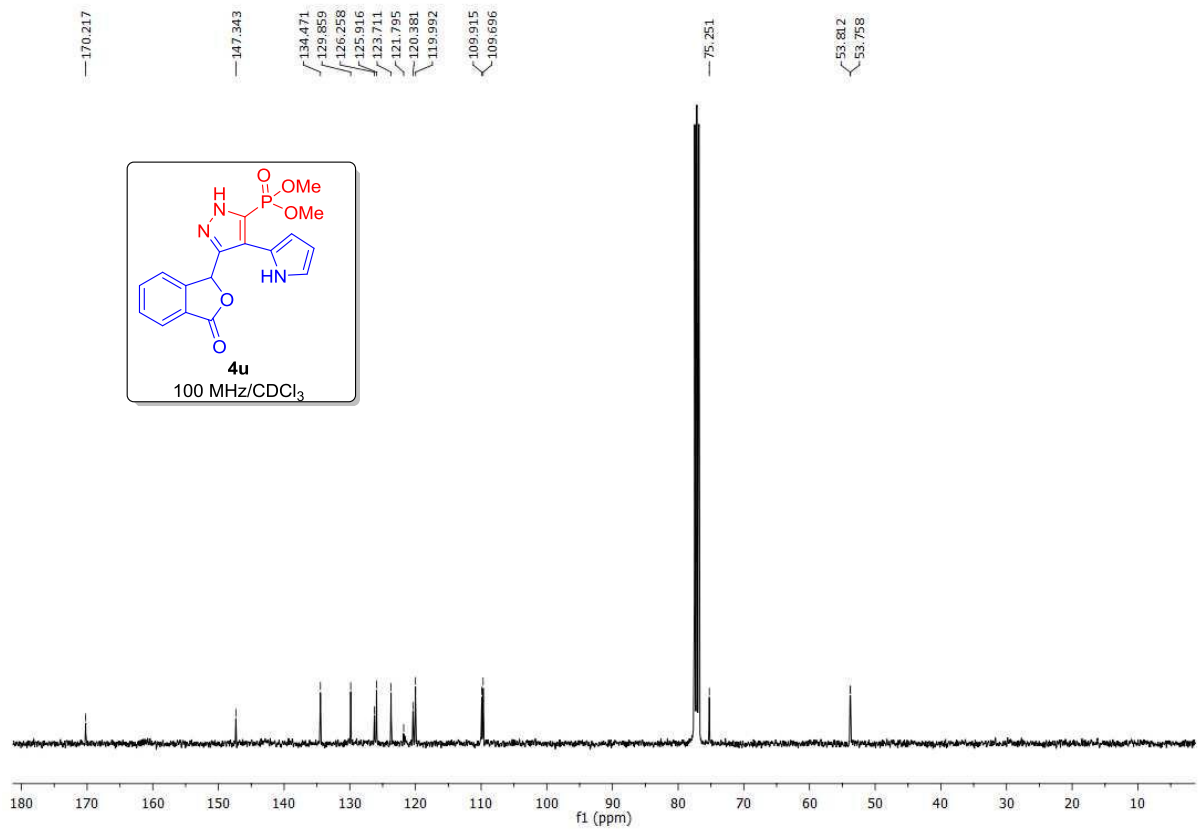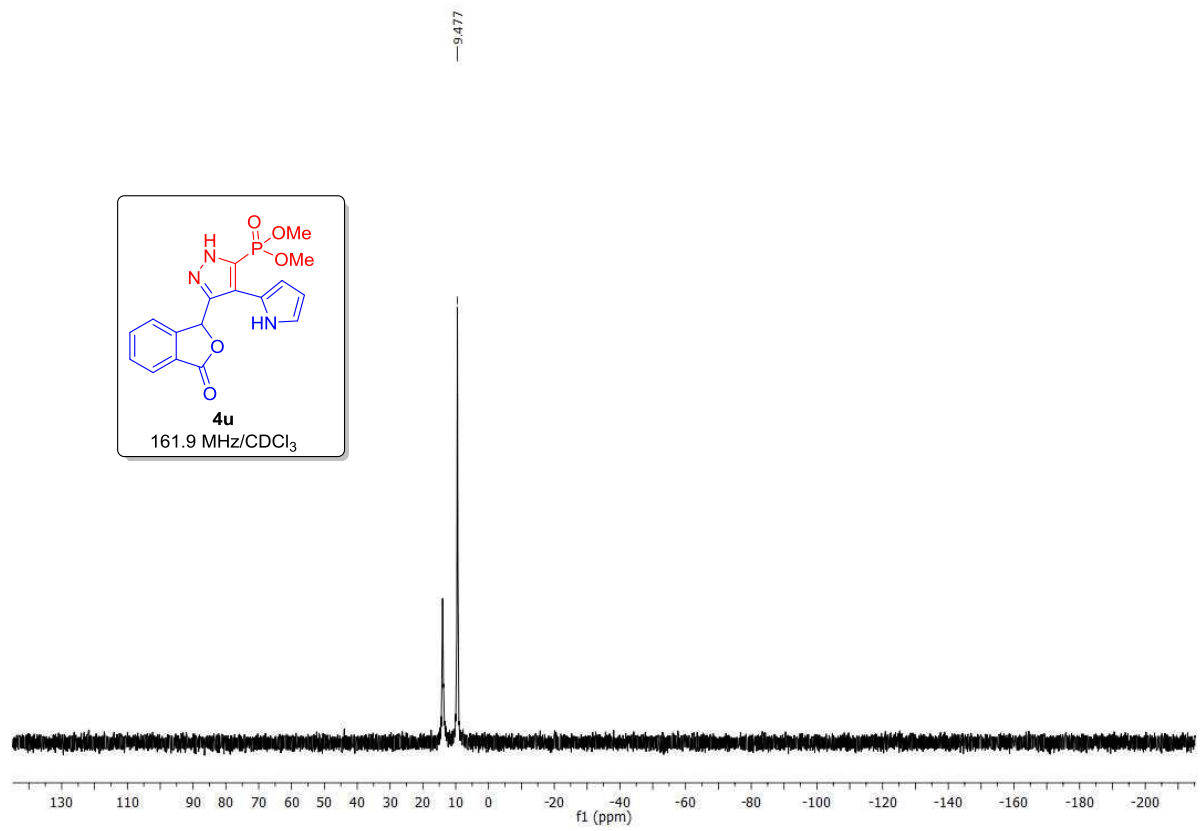

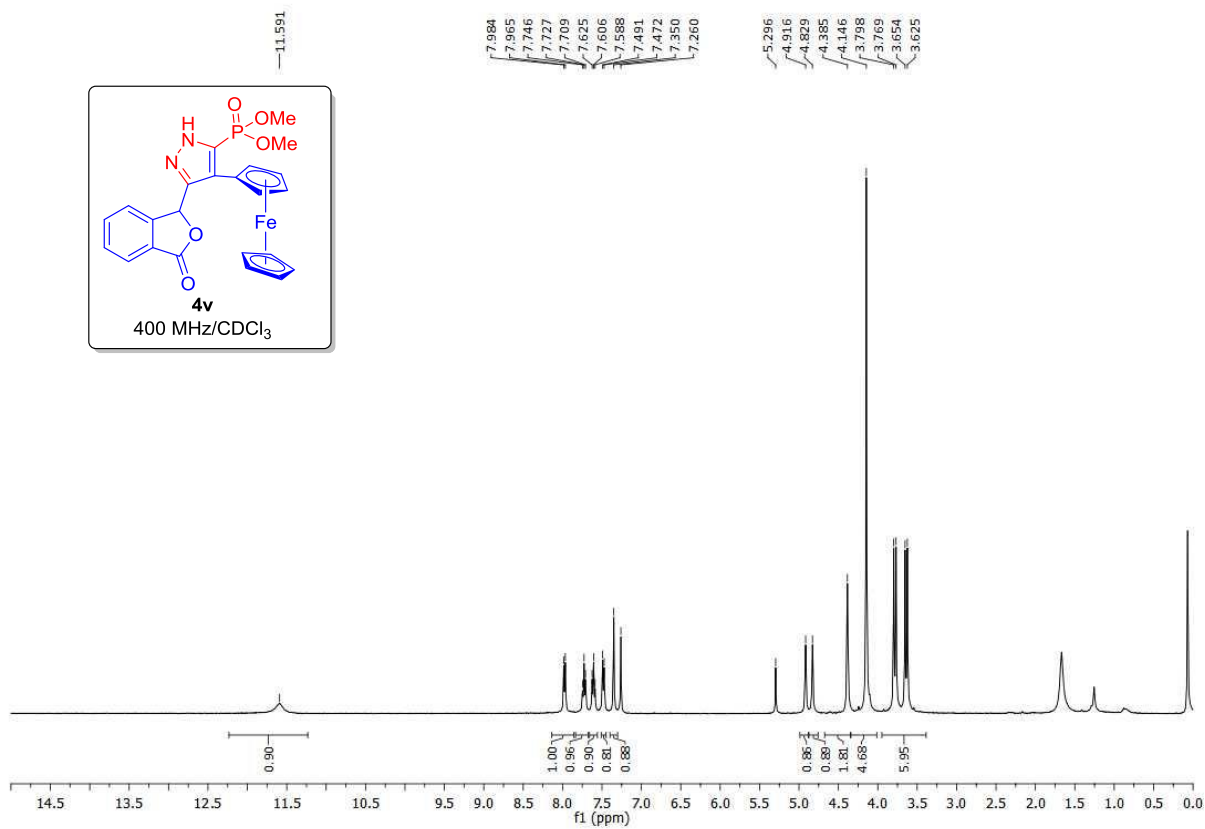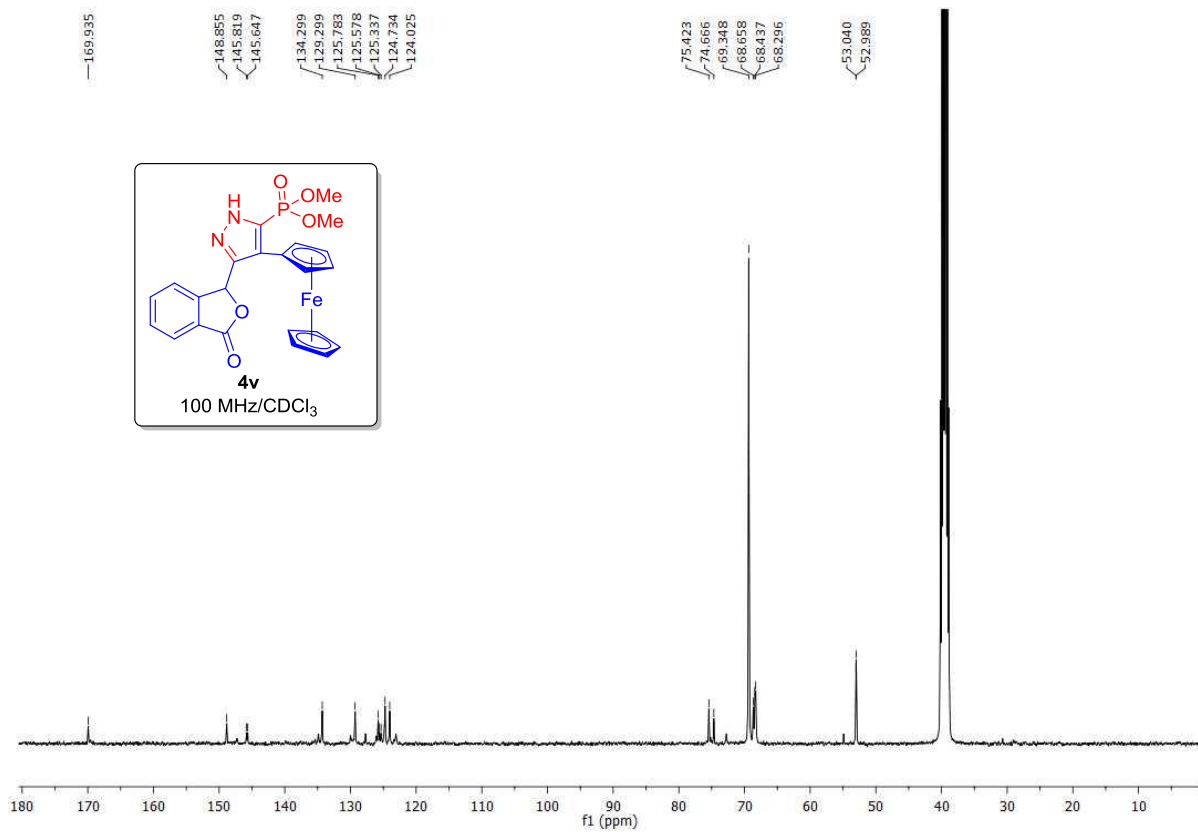

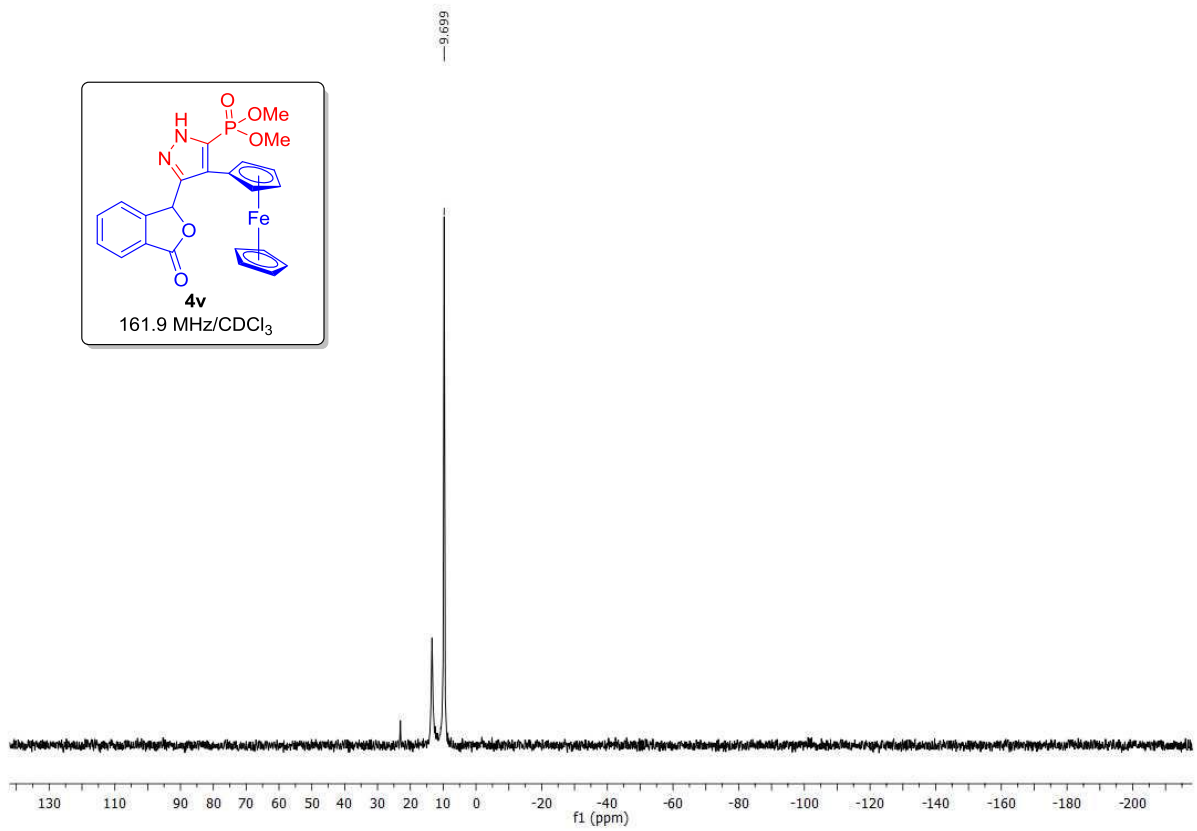

7.917, 7.898, 7.669, 7.651, 7.632, 7.559, 7.540, 7.521, 7.399, 7.380, 6.589, 6.199, 6.158, 6.104, 6.088, 6.071, 6.048, 3.759, 3.740, 3.733, 3.703, 2.109, 2.092, 2.075, 2.057, 1.420, 1.402, 1.384, 1.366, 0.898, 0.879, 0.861

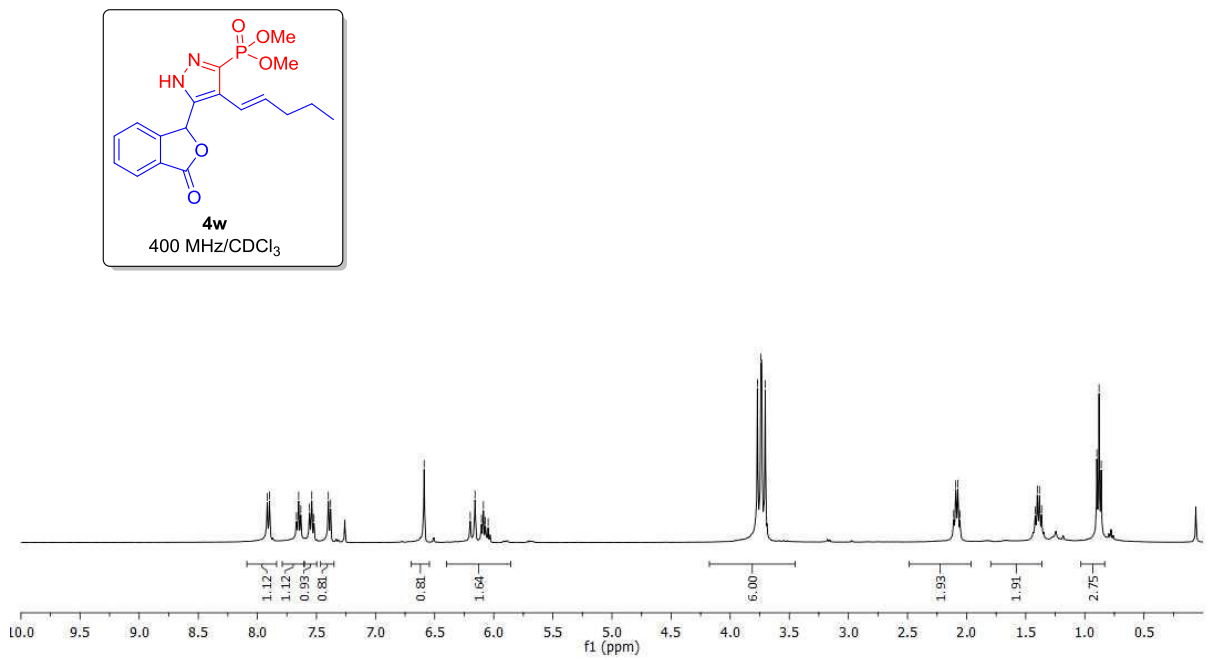



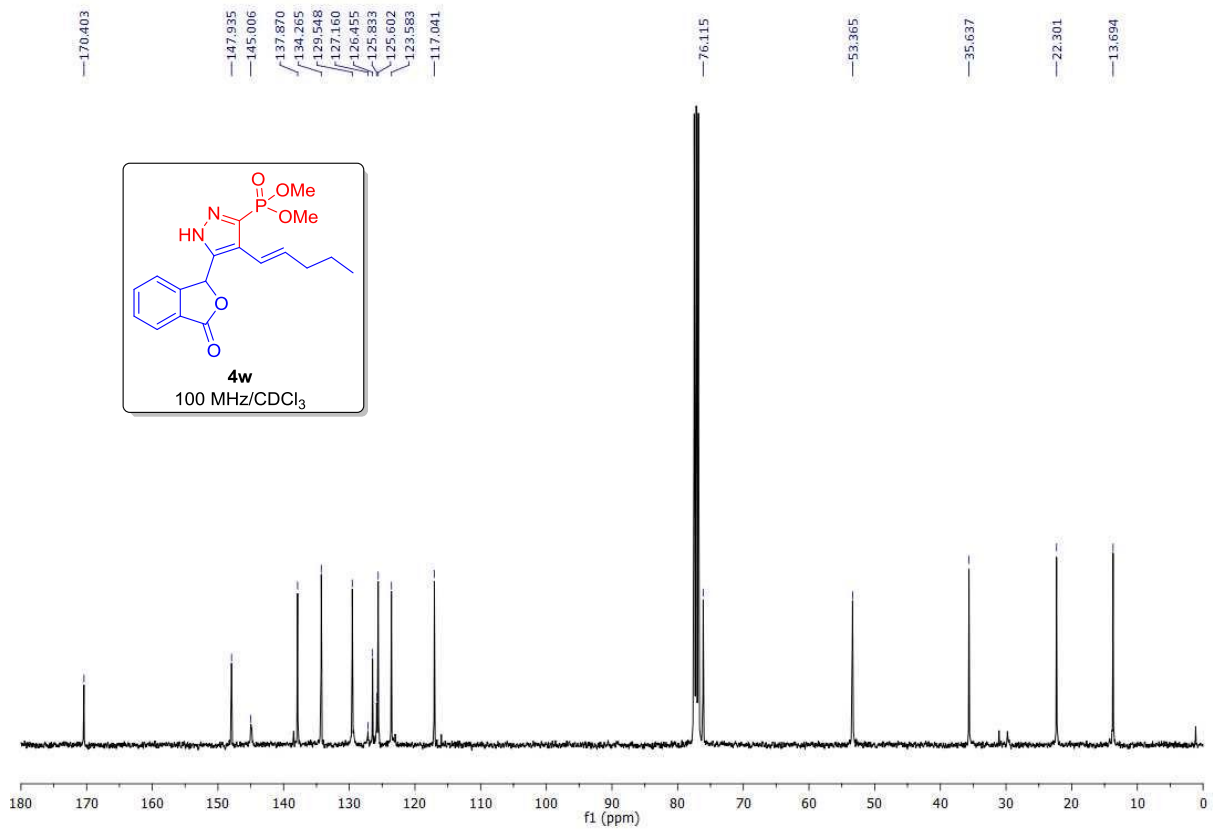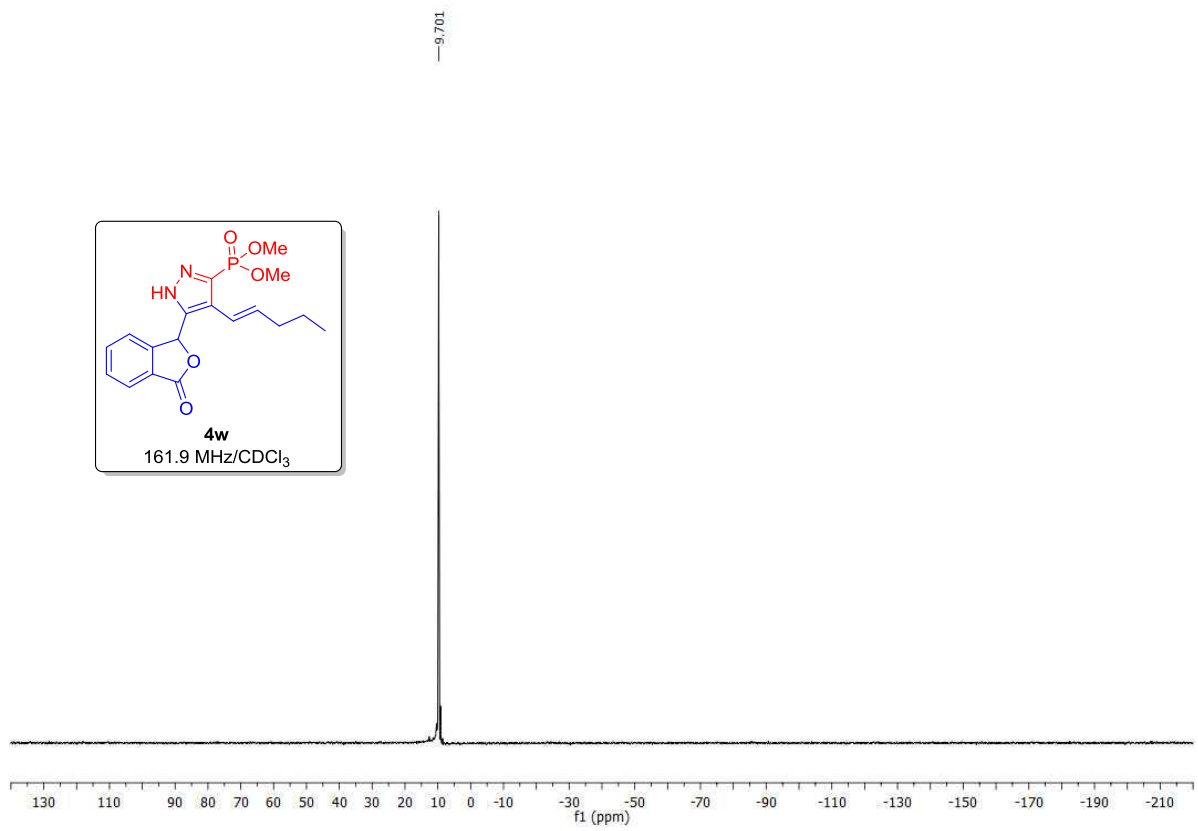

Supplement: c7ob01417a1.pdf [file c7ob01417a1.pdf]
